# Supplementary material for: Cyclic (amino)(barrelene)carbene Ru-complexes: synthesis and reactivity in olefin metathesis
Source: Royal Society of Chemistry journal article supplement (doi:10.1039/d4dt00102h), 2024-01-01
Supplement: d4dt00102h1.pdf [file d4dt00102h1.pdf]

## **Cyclic (amino)(barrelene)carbene Ru-complexes: synthesis and reactivity in olefin metathesis**

Jakub Talcik,<sup>a</sup> Melinda R. Serrato,<sup>b</sup> Antonio Del Vecchio,<sup>a,c</sup> Sophie Colombel-Rouen,<sup>a</sup> Jennifer Morvan,<sup>a</sup> Thierry Roisnel,<sup>a</sup> Rodolphe Jazzar<sup>\*b</sup>, Mohand Melaimi<sup>b</sup>, Guy Bertrand<sup>\*b</sup> and Marc Mauduit<sup>\*a</sup>

<sup>a</sup> Univ Rennes, Ecole Nationale Supérieure de Chimie de Rennes, CNRS, ISCR UMR 6226, F-35000 Rennes, France. Email: [marc.mauduit@ensc-rennes.fr](mailto:marc.mauduit@ensc-rennes.fr)

<sup>b</sup> UCSD-CNRS Joint Research Chemistry Laboratory (IRL 3555), Department of Chemistry and Biochemistry, University of California, San Diego, La Jolla, California 92093-0358, United States. Email: [rjazzar@ucsd.edu](mailto:rjazzar@ucsd.edu), [gbertrand@ucsd.edu](mailto:gbertrand@ucsd.edu)

<sup>c</sup> Present address: University of Pisa, via G. Moruzzi 13, Pisa – Tuscany, IT 56124

## Table of contents

|       |                                                                            |    |
|-------|----------------------------------------------------------------------------|----|
| 1     | Experimental .....                                                         | 4  |
| 1.1   | General information .....                                                  | 4  |
| 1.2   | Synthesis of CABC salts .....                                              | 6  |
| 1.3   | Synthesis of Pyr-GI.....                                                   | 6  |
| 1.4   | Synthesis of styrene derivative L1a .....                                  | 6  |
| 1.5   | Synthesis of styrene derivative L1b .....                                  | 7  |
| 2     | Complexes synthesis .....                                                  | 8  |
| 2.1.1 | General scheme of synthesis.....                                           | 8  |
| 2.1.2 | General procedure for CABC Hoveyda type complexes.....                     | 8  |
| 2.1.3 | Synthesis of <i>N</i> -Mesityl CABC CHPh Pyridine Ru complex (Ru-4e) ..... | 13 |
| 2.1.4 | Synthesis of <i>N</i> -Mesityl CABC Grela type Ru complex (Ru-4f) .....    | 14 |
| 2.1.5 | Synthesis of <i>N</i> -Mesityl CABC Blechert type Ru complex (Ru-4g).....  | 15 |
| 2.2   | Thermal Stability of Ru-4d .....                                           | 16 |
| 2.3   | Thermal Stability of Ru-4g .....                                           | 17 |
| 2.4   | Evaluation of the complexes in catalysis .....                             | 18 |
| 2.5   | Ring-Closing Metathesis: Optimization Conditions .....                     | 18 |
| 2.5.1 | Kinetic studies .....                                                      | 19 |
| 2.5.2 | General procedure for ring closing metathesis reaction .....               | 21 |
| 2.5.3 | General procedure for macrocyclization .....                               | 25 |
| 2.5.4 | General procedure for ring closing ene-yne metathesis .....                | 26 |
| 2.5.5 | General Procedure for Ring-Opening Cross Metathesis .....                  | 27 |
| 2.5.6 | General procedure for cross metathesis.....                                | 31 |
| 2.6   | Solid state structure obtained by X-ray diffraction.....                   | 32 |
| 2.6.1 | <i>N</i> -isopropyl CABC Hoveyda type Ru complex (Ru-4a) [JM-659] .....    | 32 |
| 2.6.2 | <i>N</i> -Adamantyl CABC Hoveyda type Ru complex (Ru-4b) [JAT-168] .....   | 33 |
| 2.6.3 | <i>N</i> -Phenyl CABC Hoveyda type Ru complex (Ru-4c) [JAT-150] .....      | 34 |
| 2.6.4 | <i>N</i> -Mesityl CABC Hoveyda type Ru complex (Ru-4d) [JAT-157].....      | 35 |
| 2.6.5 | <i>N</i> -Mesityl CABC Grela type Ru complex (Ru-4f).....                  | 36 |
| 2.7   | NMR spectra .....                                                          | 37 |
| 2.7.1 | <sup>1</sup> H NMR (400 MHz, CDCl <sub>3</sub> ) of Ru-4a .....            | 37 |
| 2.7.2 | <sup>13</sup> C NMR (101 MHz, CDCl <sub>3</sub> ) of Ru-4a .....           | 37 |
| 2.7.3 | <sup>1</sup> H NMR (400 MHz, CDCl <sub>3</sub> ) of Ru-4b .....            | 38 |

|        |                                                                                 |    |
|--------|---------------------------------------------------------------------------------|----|
| 2.7.4  | $^{13}\text{C}$ NMR (101 MHz, $\text{CDCl}_3$ ) of Ru-4b .....                  | 38 |
| 2.7.5  | $^1\text{H}$ NMR (400 MHz, $\text{CDCl}_3$ ) of Ru-4c .....                     | 39 |
| 2.7.6  | $^{13}\text{C}$ NMR (101 MHz, $\text{CDCl}_3$ ) of Ru-4c .....                  | 39 |
| 2.7.7  | $^1\text{H}$ NMR (400 MHz, $\text{CDCl}_3$ ) of Ru-4d .....                     | 40 |
| 2.7.8  | $^{13}\text{C}$ NMR (101 MHz, $\text{CDCl}_3$ ) of Ru-4d .....                  | 40 |
| 2.7.9  | $^1\text{H}$ NMR (400 MHz, $\text{C}_6\text{D}_6$ ) of Ru-4e .....              | 41 |
| 2.7.10 | $^{13}\text{C}$ NMR (101 MHz, $\text{C}_6\text{D}_6$ ) of Ru-4e .....           | 41 |
| 2.7.11 | $^1\text{H}$ NMR (400 MHz, $\text{CDCl}_3$ ) of Ru-4f .....                     | 42 |
| 2.7.12 | $^{13}\text{C}$ NMR (101 MHz, $\text{CDCl}_3$ ) of Ru-4f .....                  | 42 |
| 2.7.13 | $^1\text{H}$ NMR (400 MHz, $\text{CDCl}_3$ ) of Ru-4g .....                     | 43 |
| 2.7.14 | $^{13}\text{C}$ NMR (101 MHz, $\text{CDCl}_3$ ) of Ru-4g .....                  | 43 |
| 2.7.15 | Catalytic products .....                                                        | 44 |
| 2.7.16 | Highlighting weak hydrogen bond interactions by $^1\text{H}$ NMR in Ru-4b ..... | 55 |
| 3      | Computational details .....                                                     | 56 |
| 3.1    | SynAS-4a .....                                                                  | 57 |
| 3.2    | AntiAS-4a .....                                                                 | 57 |
| 3.3    | SynAS-4b .....                                                                  | 58 |
| 3.4    | AntiAS-4b .....                                                                 | 58 |
| 3.5    | SynAS-4c .....                                                                  | 59 |
| 3.6    | AntiAS-4c .....                                                                 | 60 |
| 3.7    | SynAS-4d .....                                                                  | 60 |
| 3.8    | AntiAS-4d .....                                                                 | 61 |
| 4      | Topological Steric Maps .....                                                   | 62 |
| 5      | Bibliography .....                                                              | 62 |

# 1 Experimental

## 1.1 General information

All commercial reagents were used as purchased and without further purification, unless otherwise mentioned. Diethyl diallylmalonate (DEDAM) was passed through alumina and distilled and degassed prior to use. Cyclic (amino) (barrelene) carbenes (CABC) were prepared accordingly to the previous report.<sup>1</sup> For the synthesis of CABC salts, all reactions were performed under an atmosphere of argon using standard Schlenk techniques or glovebox when mentioned. Toluene, tetrahydrofuran, dichloromethane and diethyl ether used for complex synthesis and catalysis, were purified using MBraun Solvent Purification Systems; all other used solvents were dried and degassed using standard procedures. Catalysis reactions were performed under Argon atmosphere using standard Schlenk techniques or in a glove box when mentioned. Reactions at elevated temperature were maintained by thermostatically controlled oil-baths. A temperature of 0 °C was obtained with an ice slush bath and -50 °C or -78 °C were obtained with a mixture of acetone and liquid nitrogen bath. Reactions were monitored by thin-layer chromatography (TLC) carried out on aluminum backed silica gel 60 (F254) plates from MERCK (grain-size distribution 60/20 µm); visualized using 254 nm UV light and KMnO<sub>4</sub> in water for staining. Purifications were performed by column chromatography with silica gel (spherical, particle size 40 µm, neutral) purchased from Sigma-Aldrich. The eluents employed are reported as volume (volume ratios). The required amounts of [Ru] were taken prior each reaction from freshly prepared stock solutions. All the reactions were quenched with ethylvinyl ether (EVE). Multinuclear NMR spectra were recorded on a Bruker (<sup>1</sup>H: 400 MHz, <sup>13</sup>C: 101 MHz, <sup>31</sup>P: 162 MHz) spectrometer with complete proton decoupling for nucleus other than <sup>1</sup>H. Chemical shifts are reported in parts per million (ppm), coupling constants (*J*) are reported in Hertz (Hz). Chemical shifts are reported in parts per million with the solvent resonance as the internal standard (CDCl<sub>3</sub>, <sup>1</sup>H: δ 7.26 ppm, <sup>13</sup>C: δ 77.16 ppm, C<sub>6</sub>D<sub>6</sub> <sup>1</sup>H: δ 7.16 ppm, <sup>13</sup>C: δ 128.06 ppm). Multiplicities in <sup>1</sup>H NMR are reported using following abbreviations: s = singlet, br s = broad singlet, d = doublet, dd = double doublet, ddd = double double doublet, dt = double triplet, t = triplet, q = quartet, quint = quintet, sept = septet, m = multiplet. GC-MS spectra have been performed on SH-Rxi-5ms column (30.0 m x 0.25 mm ID; 0.25 µm thickness) (Shimadzu) using two different methods. For Ru complexes and catalysis products, HRMS were recorded on a Waters QToF-I spectrometer using ESI at the Centre Régional de Mesures Physiques de l'Ouest (CRMPO), Université de Rennes 1. X-Ray crystallography: Intensity data were collected on a D8 VENTURE Bruker AXS diffractometer equipped with a (CMOS) PHOTON

100 detector using MoK $\alpha$  radiation (0.71073 Å) at T = 150 K. Data reduction was performed using the SHELXT program. The structures were resolved using the software SHELXS-97 by the direct methods and refined using SHELXL-2013-4. The CIF files of complexes Ru-4a-d have been deposited with CCDC numbers:

Ru-4a CCDC 2260084

Ru-4b CCDC 2253659

Ru-4c CCDC 2253660

Ru-4d CCDC 2253658

Ru-4f CCDC 2256504

## 1.2 Synthesis of CABC salts

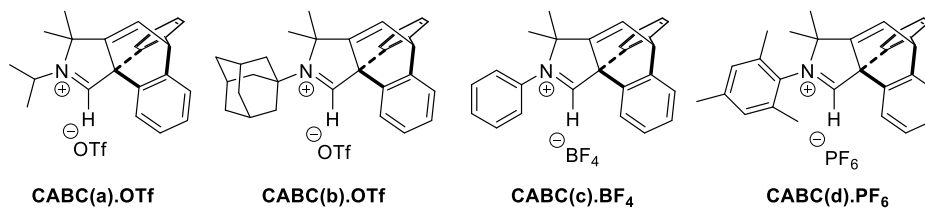

The salts **CABC(a-c).X** were prepared according to the previously published procedure,<sup>1</sup> involving subsequent [4+2] intramolecular cycloaddition, alkylation/arylation and anion exchange. For **CABC(d).X**, an alternative approach described in the same publication was used. The obtained salts were pre-treated at 100 °C for 16 hours under high *vacuum* and then introduced to Ar-filled glovebox.

## 1.3 Synthesis of Pyr-GI

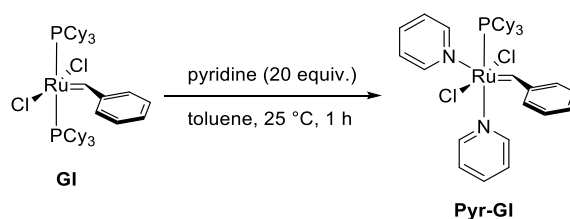

**Pyr-GI** phosphine complex was prepared according to the previously published procedure by ligand exchange starting from the **GI** (>90% yield).<sup>2</sup>

## 1.4 Synthesis of styrene derivative L1a

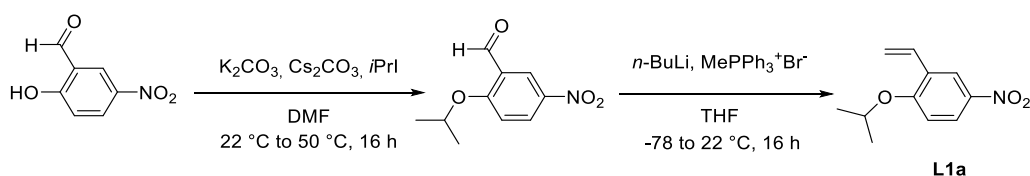

Styrene derivative **L1a** was synthesized following a previously published two step procedure starting from 2-hydroxy-5-nitrobenzaldehyde by subsequent O-alkylation and Wittig olefination.<sup>3</sup>

## 1.5 Synthesis of styrene derivative **L1b**

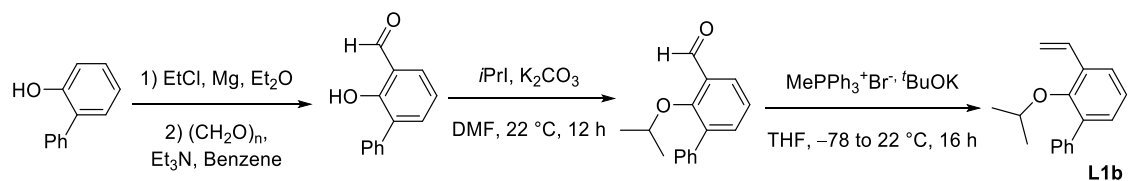

Styrene derivative **L1b** was synthesized following a previously published three step procedure starting from [1,1'-biphenyl]-2-ol by subsequent formylation, O-alkylation and Wittig olefination.<sup>4</sup>

## 2 Complexes synthesis

### 2.1.1 General scheme of synthesis

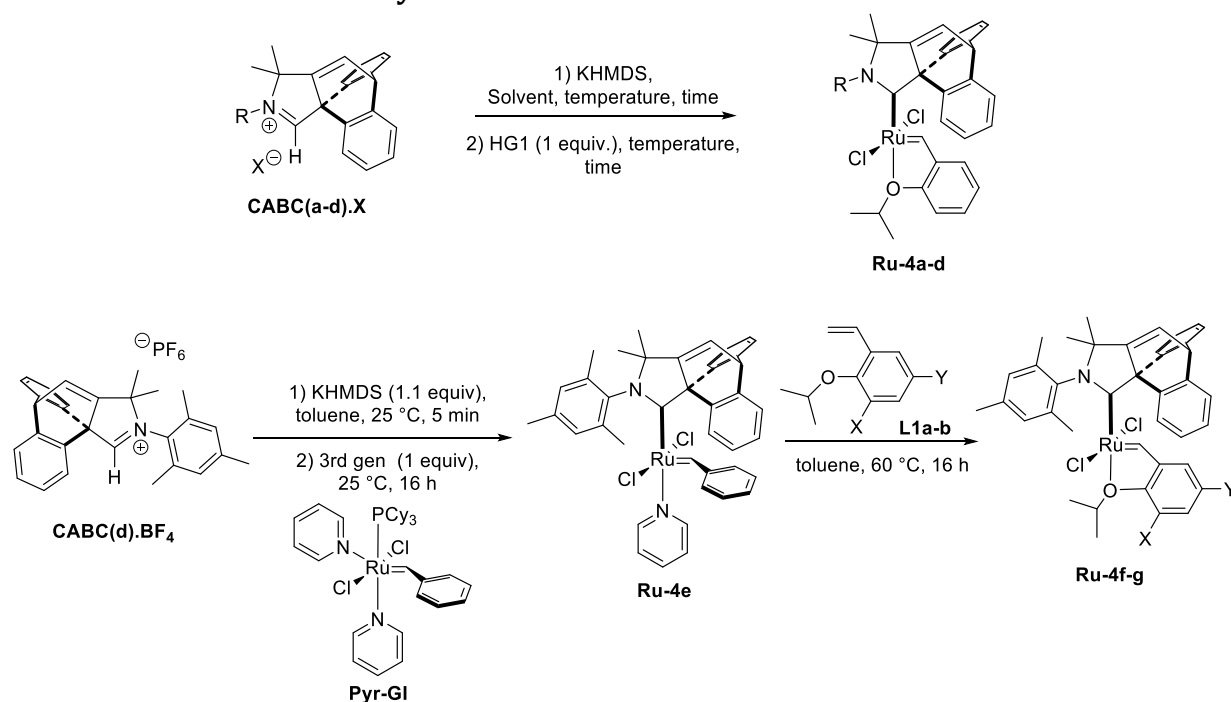

### 2.1.2 General procedure for CABC Hoveyda type complexes

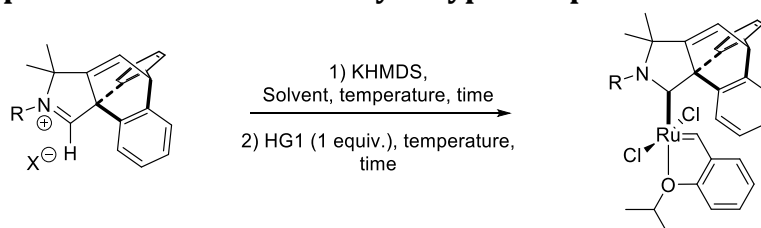

**Procedure A:** In an Ar-filled glove box, CABC salt (1.5 equiv.) was dissolved in solvent of choice. KHMDS (1.6 equiv.) was added. The mixture was allowed to stir for the indicated time at 25 °C. To this mixture, Hoveyda-Grubbs 1<sup>st</sup> generation complex (HG1) (1 equiv.) was added and the mixture was stirred the indicated time at 25 °C. The solvent was removed under *vacuum* and the product was purified by column chromatography (eluent: toluene). The solid was further diluted in dichloromethane and precipitated in hexane.

**Procedure B:** In an Ar-filled glove box, CABC salt (1.5 equiv.), KHMDS (1.6 equiv.) and HG1 (1 equiv.) were charged in an oven-dried Schlenk tube which was further cooled to -78 °C outside the glovebox. The appropriate amount of THF, previously cooled to -78 °C was cannulated to the Schlenk tube. The mixture was stirred for 16 hours and allowed to warm up to 25 °C. The solvent was removed under *vacuum* and the product was purified by column chromatography (eluent: toluene). The solid was further diluted in dichloromethane and precipitated in hexane.



### 2.1.2.1 *N*-isopropyl CABC Hoveyda type Ru complex (Ru-4a)

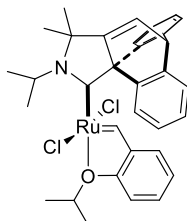

Chemical Formula: C<sub>33</sub>H<sub>35</sub>Cl<sub>2</sub>NORu  
Exact Mass: 633,11

**Ru-4a** was prepared according to the procedure **B**, with **CABC(a).OTf** (102.3 mg, 0.244 mmol, 1.5 equiv.), THF (1.5 mL), KHMDS (56.0 mg, 0.281 mmol, 1.6 equiv.), and HG-1 complex (102.5 mg, 0.171 mmol, 1.0 equiv.). The desired product was obtained after purification (eluent: pentane/acetone 9:1) as a brown solid (27.7 mg, 26 % yield).

**<sup>1</sup>H NMR** (400 MHz, CDCl<sub>3</sub>) δ 18.02 (s, 1H), 7.83 (d, *J* = 7.6 Hz, 2H), 7.60 (m, 1H), 7.36 (d, *J* = 7.3 Hz, 2H), 7.22 (dd, *J* = 7.6, 1.6 Hz, 1H), 7.15 (d, *J* = 8.4 Hz, 1H), 6.96 (td, *J* = 7.4, 1.1 Hz, 2H), 6.91 (t, *J* = 7.5 Hz, 1H), 6.78 (td, *J* = 7.6, 1.3 Hz, 2H), 6.65 (d, *J* = 6.0 Hz, 1H), 5.98 (sept, *J* = 6.7 Hz, 1H), 5.38 (sept, *J* = 6.2 Hz, 1H), 5.22 (d, *J* = 6.0 Hz, 1H), 2.05 – 1.94 (m, 12H), 1.49 (s, 6H).

**<sup>13</sup>C NMR** (101 MHz, CDCl<sub>3</sub>) δ 295.2 - 294.8, 258.3, 161.2, 154.8, 146.6, 145.4, 142.9, 142.8, 131.2, 126.8, 124.7, 124.6, 124.2, 123.6, 122.7, 122.3, 113.4, 75.3, 73.9, 73.4, 62.5, 51.9, 31.9, 25.0, 22.4.

**HRMS/ESI** for (C<sub>36</sub> H<sub>33</sub> N O <sup>35</sup>Cl<sub>2</sub> <sup>102</sup>Ru) (M<sup>+</sup>): calc.: 633.11337, found: 633.1135.

X-ray diffraction: CCDC 2260084

### 2.1.2.2 *N*-Adamantyl CABC Hoveyda type Ru complex (Ru-4b)

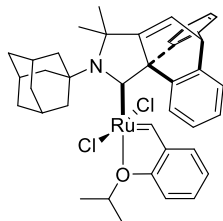

Chemical Formula: C<sub>40</sub>H<sub>43</sub>Cl<sub>2</sub>NORu  
Exact Mass: 725,18

**Ru-4b** was prepared according to the procedure **A** for the room temperature stable carbenes complexes synthesis with **CABC(b).OTf** (198 mg, 0.356 mmol, 1.05 equiv.), toluene (3 mL), KHMDS (108 mg, 0.541 mmol, 1.6 equiv.), and HG-1 complex (200 mg, 0.333 mmol, 1.0 equiv.). The salt was deprotonated during 30 minutes at 25 °C, followed by 2 hours of stirring with HG1 at 25°C. The desired product was obtained after purification (eluent: toluene) as a green solid (179.7 mg, 74 % yield).

<sup>1</sup>H NMR (400 MHz, CDCl<sub>3</sub>) δ 18.49 (s, 1H), 8.21 – 8.14 (m, 2H), 7.66 – 7.57 (m, 1H), 7.35 (dd, *J* = 7.3, 1.4 Hz, 2H), 7.13 (d, *J* = 8.5 Hz, 1H), 7.02 (dd, *J* = 7.6, 1.7 Hz, 1H), 6.95 (td, *J* = 7.4, 1.1 Hz, 2H), 6.85 (t, *J* = 7.4 Hz, 1H), 6.76 (td, *J* = 7.6, 1.4 Hz, 2H), 6.63 (d, *J* = 6.0 Hz, 1H), 5.28 (hept, *J* = 6.2 Hz, 1H), 5.19 (d, *J* = 6.0 Hz, 1H), 3.28 – 3.24 (m, 6H), 2.51 (s, 3H), 2.08 (m, 3H), 1.88 (m, 8H), 1.83 (m, 1H), 1.58 (s, 6H).

<sup>13</sup>C NMR (101 MHz, CDCl<sub>3</sub>) δ 313.0 – 312.8, 259.6, 161.3, 155.6, 147.9, 145.3, 143.7, 132.6, 127.2, 125.4, 124.8, 124.6, 124.4, 122.3, 122.2, 113.7, 75.8, 75.1, 74.6, 66.7, 52.0, 35.8, 33.6, 31.1, 22.8.

HRMS/ESI for (C<sub>40</sub> H<sub>43</sub> N O <sup>35</sup>Cl<sub>2</sub> <sup>102</sup>Ru) (M<sup>+</sup>): calc.: 725.1759, found : 725.1758.

X-ray diffraction: CCDC 2253659

### 2.1.2.3 *N*-Phenyl CABC Hoveyda type Ru complex (Ru-4c)

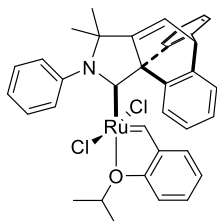

Chemical Formula: C<sub>36</sub>H<sub>33</sub>Cl<sub>2</sub>NORu  
Exact Mass: 667,10

**Ru-4c** was prepared according to procedure **B** with **CABC(c).BF<sub>4</sub>** (217.4 mg, 0.500 mmol, 1.5 equiv.), THF (3 mL), KHMDS (106.3 mg, 0.533 mmol, 1.6 equiv.), and HG1 complex (200.0 mg, 0.333 mmol, 1.0 equiv.). The reaction time was modified: after the addition of THF in the mixture, it was stirred for one hour during which time the temperature increased from -78°C to approximately -50°C, before removal from the acetone bath. The mixture was stirred for one more hour at 25°C. The desired product was obtained after purification (eluent: toluene) as a brown solid (127.6 mg, 62 % yield).

**<sup>1</sup>H NMR** (400 MHz, CDCl<sub>3</sub>) δ 18.19 (d, *J* = 0.8 Hz, 1H), 8.00 – 7.92 (m, 4H), 7.67 – 7.53 (m, 4H), 7.41 (dd, *J* = 7.3, 1.3 Hz, 2H), 7.24 (dd, *J* = 7.7, 1.6 Hz, 1H), 7.08 – 6.95 (m, 3H), 6.93 – 6.79 (m, 4H), 5.32 – 5.26 (m, 1H), 5.18 (sept, *J* = 6.1 Hz, 1H), 1.50 (d, *J* = 6.1 Hz, 6H), 1.31 (s, 6H).

**<sup>13</sup>C NMR** (101 MHz, CDCl<sub>3</sub>) δ 298.6 – 298.4, 262.3, 158.6, 154.9, 146.8, 145.3, 143.2, 137.2, 134.2, 131.4, 129.9, 128.9, 128.5, 128.1, 124.9, 124.8, 124.1, 123.4, 122.9, 122.8, 122.2, 113.3, 75.6, 74.9, 73.5, 52.0, 43.6, 29.4, 21.7.

**HRMS/ESI** for (C<sub>36</sub> H<sub>33</sub> N O <sup>35</sup>Cl<sub>2</sub> <sup>102</sup>Ru) (M<sup>+</sup>): calc.: 667.09772, found: 667.0979.

X-ray diffraction: CCDC 2253660

#### 2.1.2.4 *N*-Mesityl CABC Hoveyda type Ru complex (Ru-4d)

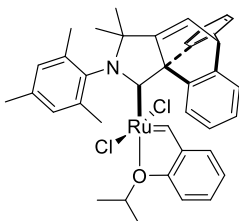

Chemical Formula: C<sub>39</sub>H<sub>39</sub>Cl<sub>2</sub>NORu  
Exact Mass: 709,15

**Ru-4d** was prepared according to the procedure **A**, using **CABC(d).PF<sub>6</sub>** (106.7 mg, 0.2 mmol, 1.3 equiv.), THF (2 mL), KHMDS (39.7 mg, 0.2 mmol, 1.3 equiv.), and HG1 (95.7 mg, 0.16 mmol, 1.0 equiv.). The mixture was stirred for 2 hours at 25 °C. The desired product was obtained after purification (eluent: toluene) as a green solid (92 mg, 78 % yield).

**<sup>1</sup>H NMR** (400 MHz, CDCl<sub>3</sub>) δ 18.17 (s, 1H), 8.03 (dd, *J* = 7.7, 1.1 Hz, 2H), 7.62 – 7.53 (m, 1H), 7.41 (dd, *J* = 7.3, 1.3 Hz, 2H), 7.25 (dd, *J* = 7.7, 1.6 Hz, 1H), 7.16 (s, 2H), 7.08 – 6.97 (m, 3H), 6.94 – 6.79 (m, 3H), 6.81 (d, *J* = 6.0 Hz, 1H), 5.28 (d, *J* = 6.0 Hz, 1H), 5.13 (sept, *J* = 6.1 Hz, 1H), 2.44 (s, 6H), 2.41 (s, 3H), 1.53 (d, *J* = 6.1 Hz, 6H), 1.34 (s, 6H).

**<sup>13</sup>C NMR** (101 MHz, CDCl<sub>3</sub>) δ 297.6 – 297.3, 266.9, 159.4, 154.9, 147.3, 145.4, 143.7, 139.4, 139.0, 135.9, 131.5, 130.6, 127.8, 124.8, 124.7, 124.2, 123.9, 122.8, 121.9, 113.4, 75.7, 75.5, 52.1, 31.7, 30.7, 25.1, 21.6, 21.1.

**HRMS/ESI** for (C<sub>39</sub> H<sub>39</sub> N O <sup>35</sup>Cl<sub>2</sub> <sup>102</sup>Ru) (M<sup>+</sup>): calc.: 709.1446, found: 709.1449.

X-ray diffraction: CCDC 2253658

### 2.1.3 Synthesis of *N*-Mesityl CABC CHPh Pyridine Ru complex (**Ru-4e**)

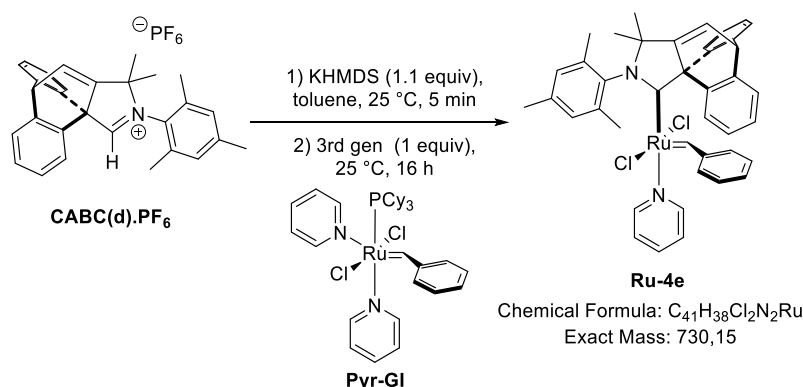

In an Ar-filled glove box, **CABC(d).PF<sub>6</sub>** (206 mg, 0.385 mmol, 1.1 equiv.) was dissolved in Toluene (3 mL) in an oven-dried Schlenk tube with KHMDS (84 mg, 0.421 mmol, 1.2 equiv.). The mixture was allowed to stir for 5 minutes at 25 °C. **Pyr-GI** (243 mg, 0.347 mmol, 1.0 equiv.), prepared according to previously reported procedure starting from Grubbs I and excess pyridine in toluene, was then added.<sup>2</sup> The reaction was stirred for 16 hours at 25°C in the glovebox. The mixture was filtered, concentrated to a minimum volume of toluene and then purified by precipitation in pentane (ca. 10 volumes of pentane/volume of toluene) followed by washing with pentane to afford **Ru-4e** as a dark green solid (213 mg, 84% yield).

<sup>1</sup>H NMR (400 MHz, C<sub>6</sub>D<sub>6</sub>) δ 20.92 (s, 1H), 9.09 (d, *J* = 7.6 Hz, 2H), 8.55 – 8.44 (m, 2H), 7.77 (d, *J* = 7.8 Hz, 2H), 7.23 (d, *J* = 7.1 Hz, 2H), 7.04 – 6.92 (m, 5H), 6.88 (t, *J* = 7.3 Hz, 2H), 6.67 (t, *J* = 7.6 Hz, 2H), 6.58 (t, *J* = 7.2 Hz, 1H), 6.33 (d, *J* = 6.0 Hz, 1H), 6.26 (t, *J* = 6.6 Hz, 2H), 4.95 (d, *J* = 6.0 Hz, 1H), 2.68 (s, 6H), 2.14 (s, 3H), 1.04 (s, 6H).

<sup>13</sup>C NMR (101 MHz, C<sub>6</sub>D<sub>6</sub>) δ 315.7, 270.8, 159.6, 153.5, 152.8, 147.9, 145.6, 139.4, 138.8, 136.3, 136.0, 131.0, 129.8, 128.9, 125.5, 125.2, 124.9, 123.1, 122.9, 78.5, 77.3, 52.6, 30.2, 25.6, 21.0.

### 2.1.4 Synthesis of *N*-Mesityl CABC Grela type Ru complex (**Ru-4f**)

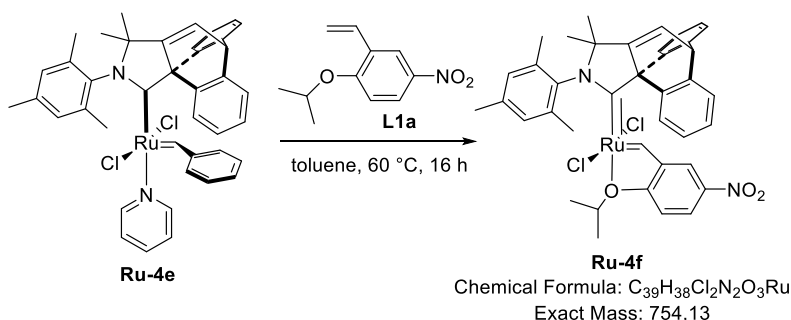

In an Ar-filled glove box, **Ru-4e** complex (50 mg, 0.068 mmol, 1.0 equiv.) was dissolved in dry and degassed Toluene (2 mL) in an oven-dried Schlenk tube, then Styrenyl **L1a** (17 mg, 0.082 mmol, 1.2 equiv.) was added and allowed to stir during 16 hours at 60°C outside of the glovebox. The mixture was purified by column chromatography (eluent: toluene), then washed with Hexane afford **Ru-4f** as a green solid (21 mg, 40% yield).

**<sup>1</sup>H NMR** (400 MHz,  $\text{CDCl}_3$ )  $\delta$  18.24 (s, 1H), 8.50 (dd,  $J = 9.2, 2.7$  Hz, 1H), 8.11 (d,  $J = 2.7$  Hz, 1H), 7.93 (d,  $J = 7.4$  Hz, 2H), 7.44 (d,  $J = 7.2$  Hz, 2H), 7.17 (s, 2H), 7.11 (d,  $J = 9.2$  Hz, 1H), 7.03 (td,  $J = 7.5, 1.1$  Hz, 2H), 6.82 (td,  $J = 7.6, 1.3$  Hz, 2H), 6.77 (d,  $J = 6.0$  Hz, 1H), 5.31 (d,  $J = 6.0$  Hz, 1H), 5.22 (sept,  $J = 6.2$  Hz, 1H), 2.43 (s, 6H), 2.41 (s, 3H), 1.55 (d,  $J = 6.1$  Hz, 6H), 1.34 (s, 6H).

**<sup>13</sup>C NMR** (101 MHz,  $\text{CDCl}_3$ )  $\delta$  292.2, 264.1, 158.9, 158.8, 147.0, 145.3, 143.0, 142.7, 139.3, 139.2, 135.5, 130.7, 128.2, 125.9, 125.2, 124.8, 123.7, 123.1, 118.5, 113.4, 78.1, 77.8, 75.6, 52.1, 30.7, 25.1, 21.6, 21.1.

X-ray diffraction: CCDC 2256504

**HRMS/ESI** for ( $\text{C}_{39}\text{H}_{38}\text{N}_2\text{O}_3\text{ }^{35}\text{Cl}_2\text{ }^{102}\text{Ru}$ ) ( $\text{M}^+$ ): calc.: 754.12975, found: 754.1301.

### 2.1.5 Synthesis of *N*-Mesityl CABC Blechert type Ru complex (**Ru-4g**)

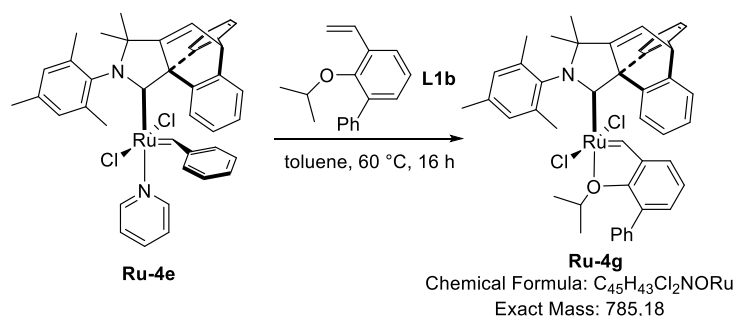

In an Ar-filled glove box, **Ru-4e** complex (213 mg, 0.29 mmol, 1.0 equiv.) was dissolved in Toluene (4 mL) in an oven-dried Schlenk tube, then Styrenyl **L1b** (84 mg, 0.35 mmol, 1.2 equiv.) was added and allowed to stir for 16 hours at 60 °C outside of the glovebox. The mixture was purified by column chromatography (eluent: toluene), then washed with Hexane to afford **Ru-4g** as a green solid (135 mg, 59% yield).

**<sup>1</sup>H NMR** (400 MHz, CDCl<sub>3</sub>) δ 18.33 (s, 1H), 8.11 (d, *J* = 7.7 Hz, 2H), 7.51 – 7.44 (m, 2H), 7.43 – 7.35 (m, 5H), 7.19 (dd, *J* = 7.6, 1.7 Hz, 1H), 7.14 (s, 2H), 7.01 (td, *J* = 7.3, 1.1 Hz, 2H), 6.96 – 6.83 (m, 3H), 6.76 (d, *J* = 6.0 Hz, 1H), 5.28 (d, *J* = 6.0 Hz, 1H), 4.72 (sept, *J* = 6.3 Hz, 1H), 2.46 (s, 6H), 2.36 (s, 3H), 1.54 (s, 1H), 1.35 (s, 6H), 1.14 (d, *J* = 6.2 Hz, 6H).

**<sup>13</sup>C NMR** (101 MHz, CDCl<sub>3</sub>) δ 299.3, 266.9, 159.4, 151.7, 147.3, 146.3, 145.4, 140.0, 139.4, 139.1, 135.8, 135.7, 131.2, 130.6, 129.6, 128.4, 127.9, 127.7, 124.8, 124.7, 124.3, 123.7, 122.8, 122.5, 77.9, 75.8, 52.1, 30.8, 25.1, 21.1, 21.0.

**HRMS/ESI** for (C<sub>45</sub> H<sub>43</sub> N O <sup>35</sup>Cl<sub>2</sub> <sup>102</sup>Ru) (M<sup>+</sup>): calc.: 785.17597, found: 785.1760 (0 ppm).

## 2.2 Thermal Stability of Ru-4d

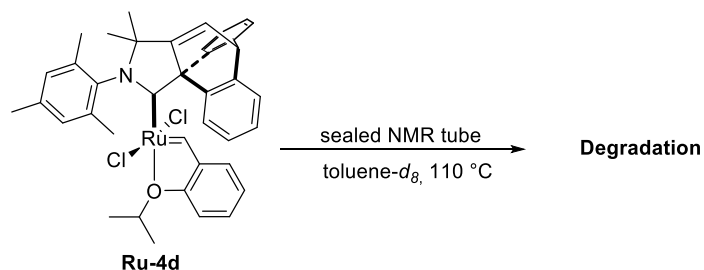

In a Wilmaud® tube equipped with J Young valve, The **Ru-4d** complex (15.2 mg, 0.021 mmol, 1.0 equiv.) was dissolved in dry and degassed toluene-*d*<sub>8</sub> (0.5 mL) and 1,3,5-trimethoxybenzene (ca. 2 mg, 0.0118 mmol, 3.3 equiv.) as an internal standard were introduced in the reaction mixture, which was heated at 110°C. The resulting solution was held at 110 °C and monitored by <sup>1</sup>H-NMR over time.

| Time (h) | Ru-4d (%) |
|----------|-----------|
| 2        | 100       |
| 5        | 99        |
| 22       | 98        |
| 27       | 98        |
| 48       | 97        |
| 70       | 97        |
| 192      | 97        |
| 216      | 97        |
| 240      | 97        |
| 336      | 83        |
| 360      | 83        |
| 384      | 81        |
| 408      | 81        |
| 432      | 81        |
| 504      | 81        |
| 528      | 80        |
| 552      | 79        |
| 600      | 79        |
| 696      | 78        |
| 720      | 78        |
| 744      | 78        |

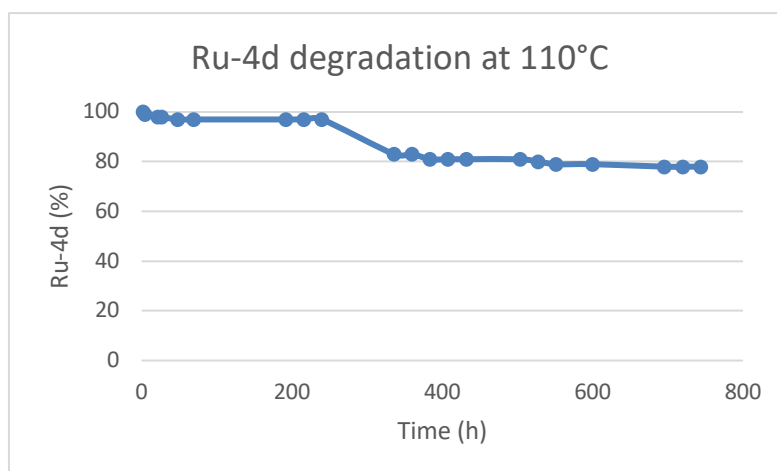



## 2.3 Thermal Stability of Ru-4g

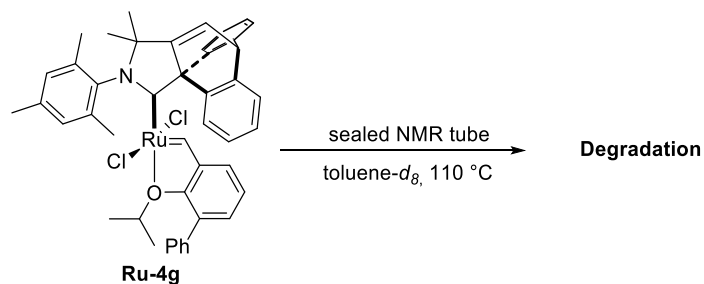

In a standard NMR tube, The **Ru-4g** complex (15 mg, 0.019 mmol, 1.0 equiv.) was dissolved in toluene-*d*<sub>8</sub> (0.5 mL) and 1,3,5-trimethoxybenzene (15.3 mg, 0.091 mmol, 5 equiv.) as an internal standard were introduced in the reaction mixture, which was heated at 110°C. The resulting solution was held at 110 °C and monitored by <sup>1</sup>H-NMR over time.

| Time (h) | Ru-4d (%) |
|----------|-----------|
| 0        | 100       |
| 0.5      | 90        |
| 1        | 88        |
| 1.5      | 87        |
| 3        | 86        |
| 4        | 85        |
| 16       | 81        |
| 48       | 72        |
| 120      | 62        |
| 144      | 55        |
| 168      | 54        |
| 192      | 52        |
| 216      | 49        |
| 312      | 38        |
| 336      | 35        |
| 360      | 34        |

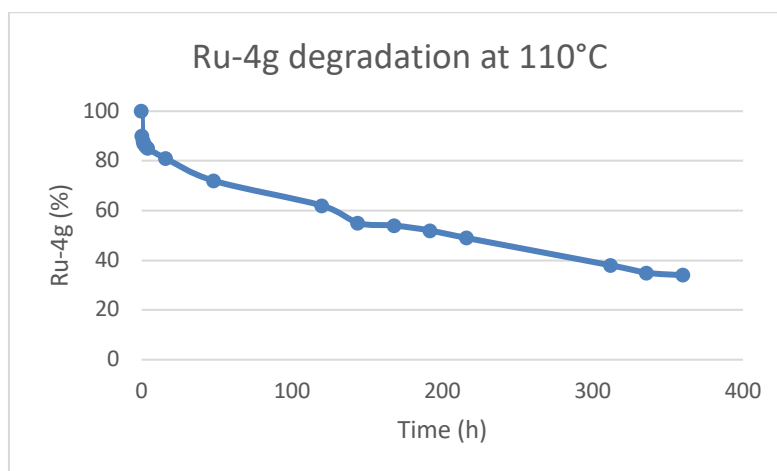

## 2.4 Evaluation of the complexes in catalysis

## 2.5 Ring-Closing Metathesis: Optimization Conditions

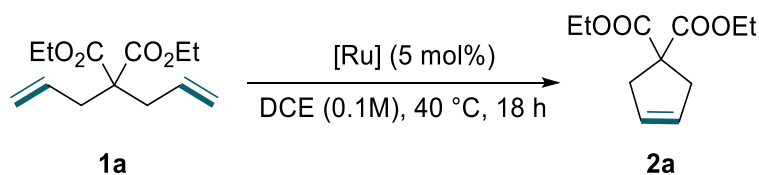

Into an Ar-filled glovebox, an oven-dried vial was charged with diethyl diallylmalonate **1a** (0.165 mmol, 40  $\mu$ L, 1.0 equiv.) and 1,3,5-trimethoxybenzene as internal standard (0.055 or 0.068 mmol, 9.2 or 11.4 mg, 0.33 or 4.0 equiv.), diluted in dry and degassed DCE (1.7 mL in total with [Ru] solution). The [Ru] complex (5 mol%) was dissolved in DCE (1.0 mL) and the appropriate volume introduced in the reaction mixture, which was further stirred at 40 °C for 18 hours. The completion reaction completion was monitored by <sup>1</sup>H-NMR.

| Entry | Catalyst | NMR conversion | NMR Yield |
|-------|----------|----------------|-----------|
|       |          | [%]            | [%]       |
| 1     | Ru-4a    | 5              | 1         |
| 2     | Ru-4b    | 3              | 2         |
| 3     | Ru-4c    | 7              | 5         |
| 4     | Ru-4d    | 9              | 7         |
| 5     | Ru-4e    | 45             | 41        |
| 6     | Ru-4f    | 14             | 13        |
| 7     | Ru-4g    | 75             | 73        |

## 2.5.1 Kinetic studies

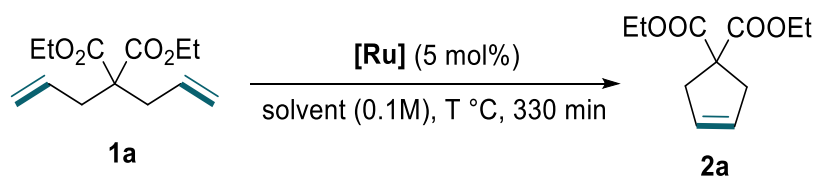

Diethyl diallylmalonate **1a** (0.17 mmol, 42  $\mu$ L, 1.0 equiv.) and a solution of **Ru-4g** (0.0085 mmol, 6.6 mg, 5 mol%) in Dichloroethane or toluene were charged, under continuous Ar flow, into an oven-dried Wilmaud<sup>®</sup> NMR tube. The reaction was kept for 330 minutes at 75 or 110 °C and analyzed each 30 minutes at the <sup>1</sup>H-NMR using 1,3,5-trimethoxybenzene as internal standard (0.17 mmol, 28.8 mg, 1 equiv.).

| Time (min) | Yield (%) |
|------------|-----------|
| T0         | 0         |
| 30         | 77        |
| 60         | 87        |
| 90         | 89        |
| 120        | 91        |
| 150        | 92        |
| 180        | 95        |
| 210        | 95        |
| 230        | 95        |
| 300        | 95        |
| 330        | 95        |

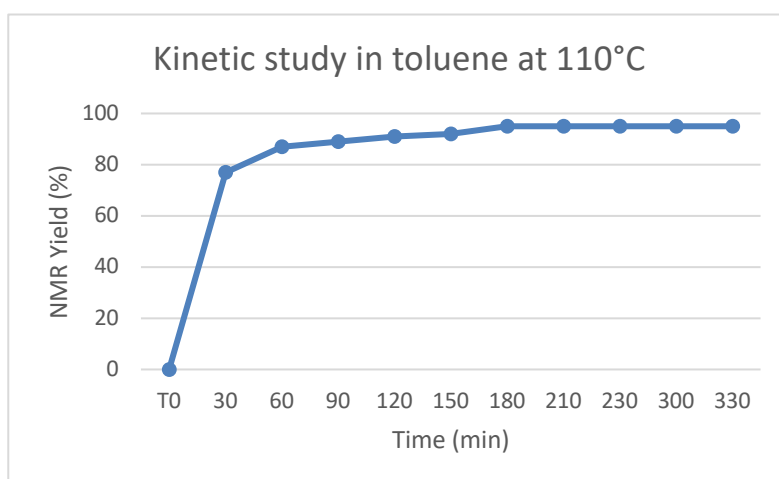

| Time (min) | Yield (%) |
|------------|-----------|
| T0         | 0         |
| 30         | 20        |
| 60         | 31        |
| 90         | 41        |
| 120        | 47        |
| 150        | 51        |
| 180        | 54        |
| 210        | 57        |
| 230        | 64        |
| 300        | 64        |
| 330        | 70        |

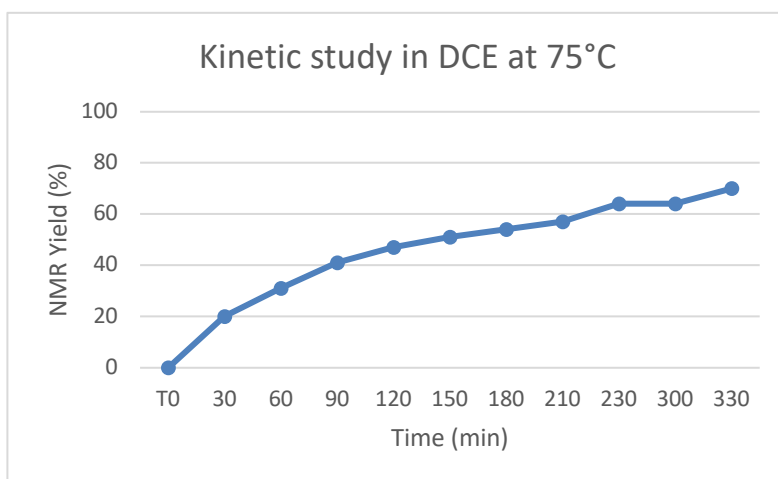

Diethyl diallylmalonate **1a** (0.17 mmol, 42  $\mu$ L, 1.0 equiv.) and a solution of **Ru-4d** (0.0085 mmol, 6 mg, 5 mol%) in toluene were charged, under continuous Ar flow, into an oven-dried Wilmaud<sup>®</sup> NMR tube. The reaction was kept for 360 minutes at 110 °C and analyzed throughout the time at the <sup>1</sup>H-NMR using 1,3,5-trimethoxybenzene as internal standard (0.17 mmol, 28.8 mg, 1 equiv.).

| Time (min) | Yield (%) |
|------------|-----------|
| T0         | 0         |
| 30         | 14        |
| 60         | 23        |
| 120        | 34        |
| 180        | 44        |
| 240        | 50        |
| 300        | 54        |
| 360        | 60        |

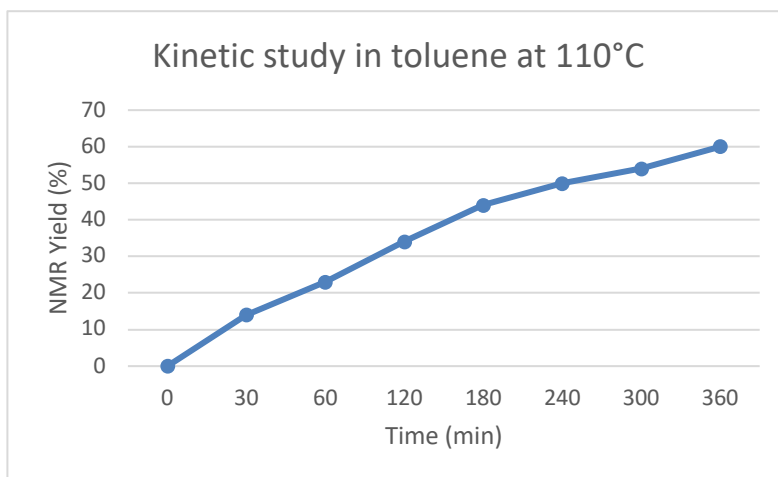

Diethyl diallylmalonate **1a** (0.12 mmol, 30  $\mu$ L, 1.0 equiv.) and a solution of **Ru-4f** (0.0062 mmol, 4.6 mg, 5 mol%) in toluene-*d*<sub>8</sub> were charged, under continuous Ar flow, into an oven-dried Wilmaud<sup>®</sup> NMR tube. The reaction was kept for 3 hours at 110 °C and analyzed throughout the time at the <sup>1</sup>H-NMR using 1,3,5-trimethoxybenzene as internal standard (0.12 mmol, 6.8 mg, 0.33 equiv.).

| Time (min) | Yield (%) |
|------------|-----------|
| T0         | 0         |
| 45         | 75        |
| 60         | 78        |
| 90         | 83        |
| 120        | 90        |
| 150        | 90        |
| 180        | 90        |

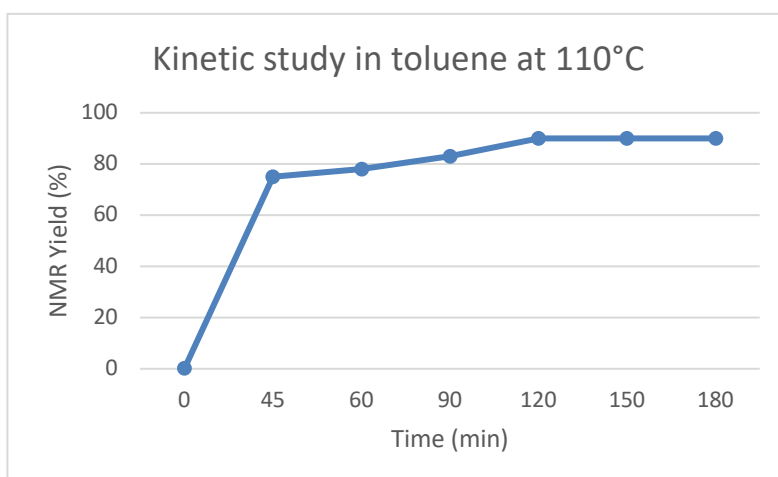

## 2.5.2 General procedure for ring closing metathesis reaction

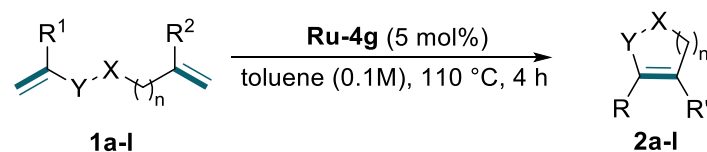

The substrate (0.1, 0.17 or 0.2 mmol, 1.0 equiv.) and a solution of catalyst **Ru-4g** (0.01 or 0.005 mmol, 7.8 or 3.9 mg, 5 mol%) in toluene (1, 1.7 or 2 mL) were sequentially loaded into an oven-dried vial. The reaction was stirred at 110 °C for 4 hours outside the glovebox then quenched with EVE. The final conversions and yields were measured by <sup>1</sup>H-NMR upon addition of 1,3,5-trimethoxybenzene as internal standard (IS; 0.066 or 0.1 mmol, 0.3 or 1.0 equiv.).

### Diethyl cyclopent-3-ene-1,1-dicarboxylate (**2a**)

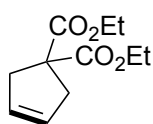

Chemical Formula: C<sub>11</sub>H<sub>16</sub>O<sub>4</sub>  
Molecular Weight: 212,24

The reaction was performed following the general procedure, stirring a solution of diethyl diallylmalonate **1a** (0.17 mmol, 41 mg, 1.0 equiv.) providing **diethyl cyclopent-3-ene-1,1-dicarboxylate (2a)** with 99% conversion and 97% NMR yield (IS = 0.17 mmol, 28.8 mg, 1.0 equiv.). The data were consistent with the reported ones.<sup>5</sup>

<sup>1</sup>H NMR (400 MHz, toluene-*d*<sub>8</sub>) δ 5.69 – 5.61 (m, 2H), 4.19 (q, *J* = 7.1 Hz, 4H), 3.36 (s, 4H), 1.18 (t, *J* = 7.1 Hz, 6H).

### diethyl 3-methylcyclopent-3-ene-1,1-dicarboxylate (**2b**)

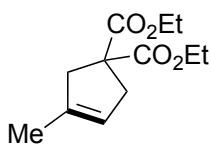

Chemical Formula: C<sub>12</sub>H<sub>18</sub>O<sub>4</sub>  
Molecular Weight: 226,27

The reaction was performed following the general procedure, stirring a solution of diethyl 2-allyl-2-(2-methylallyl)malonate **1b** (0.2 mmol, 49.8 mg, 1.0 equiv.) providing **diethyl 3-methylcyclopent-3-ene-1,1-dicarboxylate (2b)** with 83% conversion and 79% NMR yield. The data were consistent with the reported ones.<sup>5</sup>

<sup>1</sup>H NMR (400 MHz, CDCl<sub>3</sub>) δ 5.22 – 5.15 (m, 1H), 4.19 (q, *J* = 7.1 Hz, 4H), 2.99 – 2.94 (m, 2H), 2.93 – 2.87 (m, 2H), 1.72 – 1.69 (m, 3H), 1.24 (t, *J* = 7.1Hz, 6H).

### diethyl cyclohept-3-ene-1,1-dicarboxylate (**2d**)

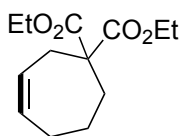

Chemical Formula: C<sub>13</sub>H<sub>20</sub>O<sub>4</sub>  
Molecular Weight: 240,30

were consistent with the reported ones.<sup>5</sup>

<sup>1</sup>H NMR (400 MHz, CDCl<sub>3</sub>) δ 5.90 – 5.80 (m, 1H), 5.74 – 5.62 (m, 1H), 4.16 (q, *J* = 7.1 Hz, 4H), 2.67 (d, *J* = 6.4 Hz, 2H), 2.27 – 2.21 (m, 2H), 2.18 – 2.16 (m, 2H), 1.65 (m, 2H), 1.24 (t, *J* = 7.1 Hz, 6H).

### 1-tosyl-2,5-dihydro-1H-pyrrole (**2e**)

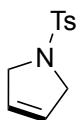

Chemical Formula: C<sub>11</sub>H<sub>13</sub>NO<sub>2</sub>S  
Molecular Weight: 223,29

were consistent with the reported ones.<sup>5</sup>

<sup>1</sup>H NMR (400 MHz, CDCl<sub>3</sub>) δ 7.73 (d, *J* = 8.5, Hz, 2H), 7.37 – 7.29 (m, 2H), 5.62 (s, 2H), 4.11 (s, 4H), 2.40 (br s, *J* = 2.9 Hz, 3H).

### 3-methyl-1-tosyl-2,5-dihydro-1H-pyrrole (**2f**)

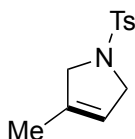

Chemical Formula: C<sub>12</sub>H<sub>15</sub>NO<sub>2</sub>S  
Molecular Weight: 237,32

data were consistent with the reported ones.<sup>5</sup>

<sup>1</sup>H NMR (400 MHz, CDCl<sub>3</sub>) δ 7.75 – 7.72 (m, 2H), 7.39 – 7.37 (m, 2H), 5.23 – 5.21 (m, 1H), 4.08 – 4.06 (m, 2H), 4.00 – 3.98 (m, 2H), 2.41 (s, 3H), 1.64 (s, 3H).

### 1-tosyl-2,3,4,7-tetrahydro-1H-azepine (2h)

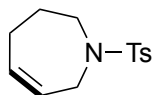

Chemical Formula: C<sub>13</sub>H<sub>17</sub>NO<sub>2</sub>S  
Molecular Weight: 251,34

The reaction was performed following the general procedure, stirring a solution of N-allyl N-allyl-N-(pent-4-en-1-yl)tosylamide **1h** (0.2 mmol, 55.9 mg, 1.0 equiv.) providing **1-tosyl-2,3,4,7-tetrahydro-1H-azepine (2h)** with 82% isolated yield. The data were consistent with the reported ones.<sup>5</sup>

**<sup>1</sup>H NMR** (400 MHz, CDCl<sub>3</sub>) δ 7.71 – 7.66 (m, 2H), 7.31 – 7.26 (m, 2H), 5.77 (dtt, *J* = 10.9, 5.4, 1.4 Hz, 1H), 5.65 (dtt, *J* = 11.3, 5.0, 1.5 Hz, 1H), 3.86 – 3.79 (m, 2H), 3.41 – 3.37 (m, 2H), 2.36 (s, 3H), 2.23 – 2.13 (m, 2H), 1.83 – 1.77 (m, 2H).

### 2,5-dihydrobenzo[b]oxepine (2i)

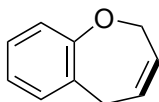

Chemical Formula: C<sub>10</sub>H<sub>10</sub>O  
Molecular Weight: 146,19

The reaction was performed following the general procedure, stirring a solution of 1-allyl-2-(allyloxy)benzene **1i** (0.1 mmol, 17.4 mg, 1.0 equiv.), providing **2,5-dihydrobenzo[b]oxepine (2i)** with 83% NMR yield. The data were consistent with the reported ones.<sup>5</sup>

**<sup>1</sup>H NMR** (400 MHz, CDCl<sub>3</sub>) δ 7.23 – 7.15 (m, 1H), 7.14 – 6.97 (m, 3H), 5.86 (dtt, *J* = 11.5, 5.4, 2.2 Hz, 1H), 5.48 (dtt, *J* = 11.5, 3.0, 1.7 Hz, 1H), 4.64 – 4.55 (m, 2H), 3.50 – 3.48 (m, 2H).

### 2-phenyl-3,6-dihydro-2H-pyran (2j)

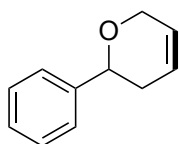

Chemical Formula: C<sub>11</sub>H<sub>12</sub>O  
Molecular Weight: 160,22

The reaction was performed following the general procedure, stirring a solution of (1-(allyloxy)but-3-en-1-yl)benzene **1j** (0.1 mmol, 18.8 mg, 1.0 equiv.), providing **2-phenyl-3,6-dihydro-2H-pyran (2j)** with 81% NMR yield. The data were consistent with the reported ones.<sup>5</sup>

**<sup>1</sup>H NMR** (400 MHz, CDCl<sub>3</sub>) δ 7.44 – 7.32 (m, 4H), 7.31 – 7.25 (m, 1H), 5.98 – 5.88 (m, 1H), 5.86 – 5.78 (m, 1H), 4.56 (dd, *J* = 10.1, 3.6 Hz, 1H), 4.38 – 3.36 (m, 2H), 2.45 – 2.32 (m, 1H), 2.31 – 2.17 (m, 1H).

### 2,2-dimethyl-6-phenyl-3,6-dihydro-2H-1,2-oxasiline (2k)

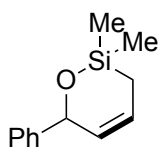

Chemical Formula: C<sub>12</sub>H<sub>16</sub>OSi  
Molecular Weight: 204,34

The reaction was performed following the general procedure, obtained from allyldimethyl((1-phenylallyl)oxy)silane **1k** (0.2 mmol, 46.5 mg, 1.0 equiv.) providing **2,2-dimethyl-6-phenyl-3,6-dihydro-2H-1,2-oxasiline (2k)** with 22% NMR yield. NMR yield was attributed basing on the characteristic signal at

5.5 ppm (q, 1H). The data were consistent with the reported ones.<sup>6</sup>

### 2,2-diphenyl-4,7-dihydro-1,3,2-dioxasilepine (2l)

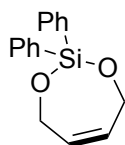

Chemical Formula: C<sub>16</sub>H<sub>16</sub>O<sub>2</sub>Si  
Molecular Weight: 268,39

The reaction was performed following the general procedure, stirring a solution of bis(allyloxy)diphenylsilane **1l** (0.2 mmol, 59.2 mg, 1.0 equiv.), providing **2,2-diphenyl-4,7-dihydro-1,3,2-dioxasilepine (2l)** with 35% NMR yield. The data were consistent with the reported literature.<sup>7</sup>

<sup>1</sup>H NMR (400 MHz, CDCl<sub>3</sub>) δ 5.76 – 5.75 (m, 2H), 4.59 – 4.57 (m, 4H). Aromatic peaks fall into the toluene solvent peaks.



### 2.5.3 General procedure for macrocyclization

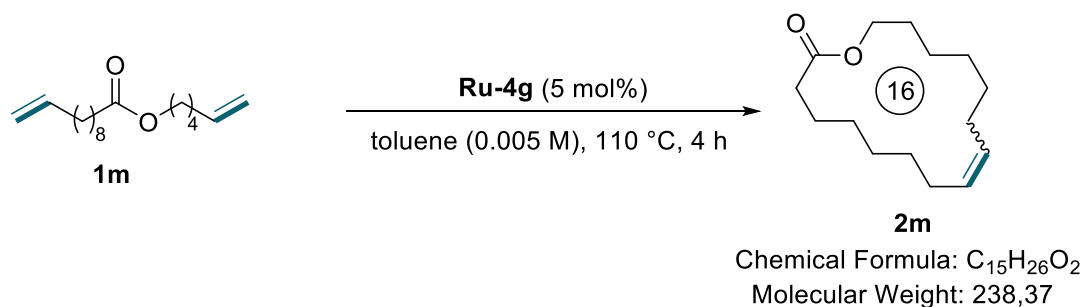

Substrate hex-5-en-1-yl undec-10-enoate **1m** (84.7 mg, 0.318 mmol, 1.0 equiv.) and **Ru-4g** (5 mol%) were charged under continuous Ar flow into an oven-dried 100 mL Schlenk tube equipped with water refrigerator and solubilized in toluene (60 mL). The reaction was stirred at 110 °C for 4 hours then quenched with ethyl vinyl ether (EVE). The solvent was evaporated and the crude product was purified by chromatography on silica gel using pentane/diethyl ether = 95/5 as eluent to yield **oxacyclohexadec-9-en-2-one (2m)** with 65% isolated yield (49.3 mg). The data were consistent with the reported literature.<sup>8</sup> Selectivity and *E/Z* ratio were measured by GC analysis : *E/Z* 70/30, selectivity >99%.

<sup>1</sup>H NMR (400 MHz, CDCl<sub>3</sub>) δ (*E/Z* isomers: 7/3) 5.54 – 5.30 (m, 2H), 4.27 – 4.12 (m, 2H), 2.42 – 2.34 (m, 2H), 2.11 (m, 4H), 1.78 – 1.64 (m, 4H), 1.53 – 1.27 (m, 12H).

#### <Chromatogram>

uV

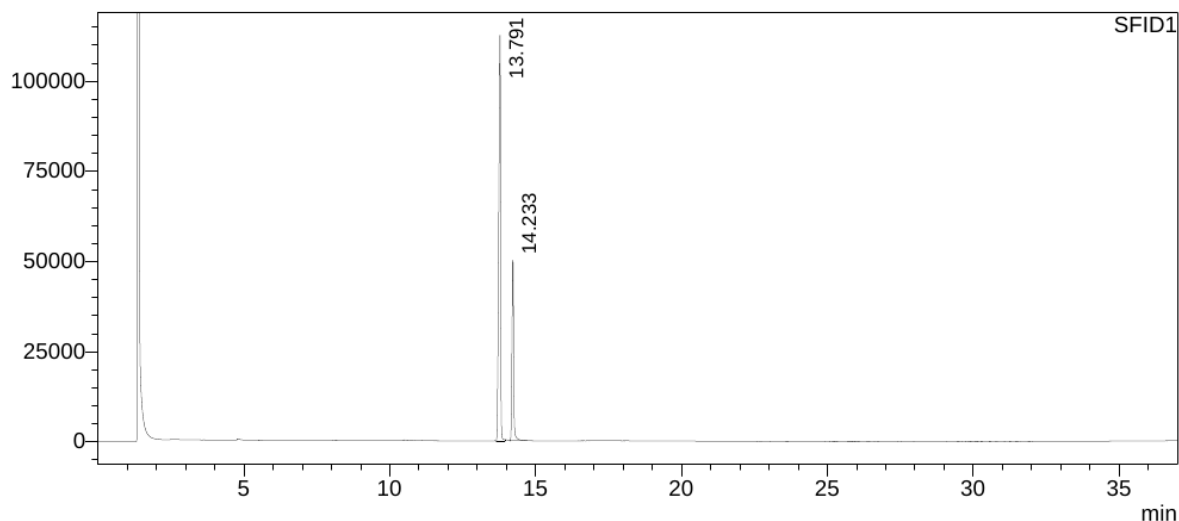

#### <Peak Table>

SFID1

| Peak# | Ret. Time | Area   | Height | Conc.  | Unit | Mark | Name |
|-------|-----------|--------|--------|--------|------|------|------|
| 1     | 13.791    | 493286 | 112060 | 71.179 |      | V    |      |
| 2     | 14.233    | 199732 | 49950  | 28.821 |      |      |      |
| Total |           | 693018 | 162010 |        |      |      |      |

## 2.5.4 General procedure for ring closing ene-yne metathesis

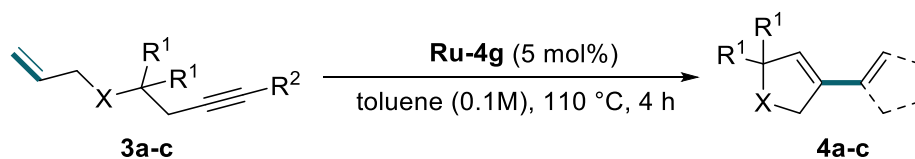

The substrate (0.1 or 0.2 mmol, 1.0 equiv.) and a solution of catalyst **Ru-4g** (0.01 or 0.005 mmol, 7.8 or 3.9 mg, 5 mol%) in toluene (1 or 2 mL) were sequentially loaded into an oven-dried vial. The reaction was stirred at 110 °C for 4 hours outside the glovebox then quenched with EVE. The final conversions and yields were measured by <sup>1</sup>H-NMR upon addition of 1,3,5-trimethoxybenzene as internal standard (IS; 0.066 or 0.1 mmol, 0.3 or 1.0 equiv.).

### 4,4',5,5'-tetrahydro-3,3'-bifuran (**4a**)

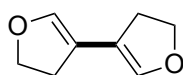

Chemical Formula: C<sub>8</sub>H<sub>10</sub>O<sub>2</sub>  
Molecular Weight: 138,17

The reaction was performed following the general procedure, stirring a solution of 1,4-bis(allyloxy)but-2-yne **3a** (0.1 mmol, 16.6 mg, 1.0 equiv.), providing **4,4',5,5'-tetrahydro-3,3'-bifuran (4a)** with 95% NMR yield. The data were consistent with the reported ones.<sup>5</sup>

<sup>1</sup>H NMR (400 MHz, CDCl<sub>3</sub>) δ 5.71 – 5.60 (m, 2H), 4.83 – 4.69 (m, 8H).

### 2,2-diphenyl-4-vinyl-2,5-dihydrofuran (**4b**)

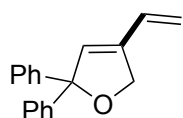

Chemical Formula: C<sub>18</sub>H<sub>16</sub>O  
Molecular Weight: 248,32

The reaction was performed following the general procedure, stirring a solution of (1-(allyloxy)prop-2-yne-1,1-diyl)dibenzene **3b** (0.2 mmol, 49.6 mg, 1.0 equiv.), providing **2,2-diphenyl-4-vinyl-2,5-dihydrofuran (4b)** with 73% NMR yield. The data were consistent with the reported ones.<sup>5</sup>

<sup>1</sup>H NMR (400 MHz, CDCl<sub>3</sub>) δ 7.42 – 7.27 (m, 8H), 6.32 – 6.23 (m, 1H), 6.23 – 6.21 (m, 1H), 5.35 (d, *J* = 17.4 Hz, 1H), 5.13 (d, *J* = 11.1 Hz, 1H), 4.81 – 4.79 (m, 2H).

### 1-tosyl-3-vinyl-2,5-dihydro-1H-pyrrole (**4c**)

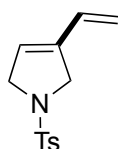

Chemical Formula: C<sub>13</sub>H<sub>15</sub>NO<sub>2</sub>S  
Molecular Weight: 249,33

The reaction was performed following the general procedure, stirring a solution of N-allyl-N-(prop-2-yn-1-yl)tosylamide **3c** (0.2 mmol, 49.8 mg, 1.0 equiv), providing **1-tosyl-3-vinyl-2,5-dihydro-1H-pyrrole (4c)** with 23% NMR yield. The data were consistent with the reported ones.<sup>5</sup>

<sup>1</sup>H NMR (400 MHz, CDCl<sub>3</sub>) δ 7.72 (d, *J* = 8.6 Hz, 2H), 7.36 – 7.27 (m, 2H), 6.39 – 6.31 (m, 1H), 5.58 – 5.54 (m, 1H), 5.15 (d, *J* = 11.4 Hz 1H), 5.01 (d, *J* = 17.6 Hz, 1H), 4.23 – 4.19 (m, 2H), 4.18 – 4.16 (m, 4H), 2.41 – 2.39 (m, 1H).

### 2.5.5 General Procedure for Ring-Opening Cross Metathesis

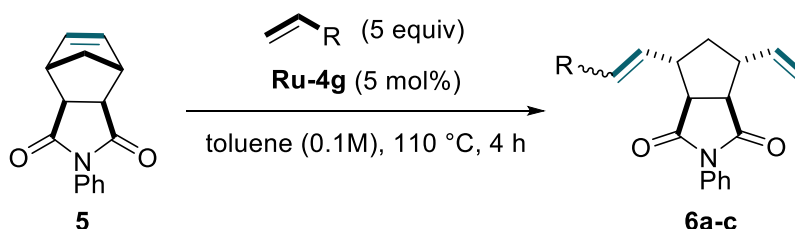

In an Ar-filled glovebox, the exo norbornene imide **5** (24 mg, 0.1 mmol, 1.0 equiv.) and the respective olefin (0.5 mmol, 5.0 equiv.) were charged into an oven-dried Schlenk tube and solubilized in toluene (0.1M). A solution of **Ru-4g** (0.005 mmol, 3.9 mg, 5 mol%) in toluene was added and the resulting solution stirred at 110 °C for 4 hours outside the glovebox. The mixture was quenched with EVE and the solvent evaporated under *vacuum*. Conversion and yield values were provided upon <sup>1</sup>H-NMR analysis of the crude in presence of 1,3,5-trimethoxybenzene as internal standard (0.1 mmol, 16.8 mg, 1.0 equiv.). The *E/Z* ratio was monitored by GC-MS.

Column Information: SH-Rxi-5ms (30.0 m x 0.25 mm ID; 0.25 μm thickness) (Shimadzu)

Carrier gas: Helium

Method: Linear velocity: constant = 40.0 cm/s

Temperature protocol:

| Rate [°C/min] | Temperature [°C] | Hold time [min] |
|---------------|------------------|-----------------|
| -             | 80               | 0               |
| 15            | 300              | 20              |

## 2-phenyl-4-styryl-6-vinyltetrahydrocyclopenta[c]pyrrole-1,3(2H,3aH)-dione (6a)

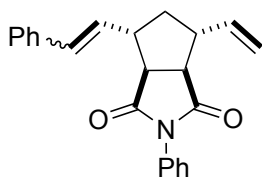

Chemical Formula:  $C_{23}H_{21}NO_2$   
Molecular Weight: 343,43

(6a) was obtained upon reaction with styrene (0.5 mmol, 60  $\mu$ L, 5.0 equiv.) as olefin partner with 73% NMR yield, E/Z 95/5. Conversion and yield were attributed basing on the characteristic signal at 2.36 - 2.18 ppm (m, 1H). The data were consistent with the reported literature.<sup>9</sup>

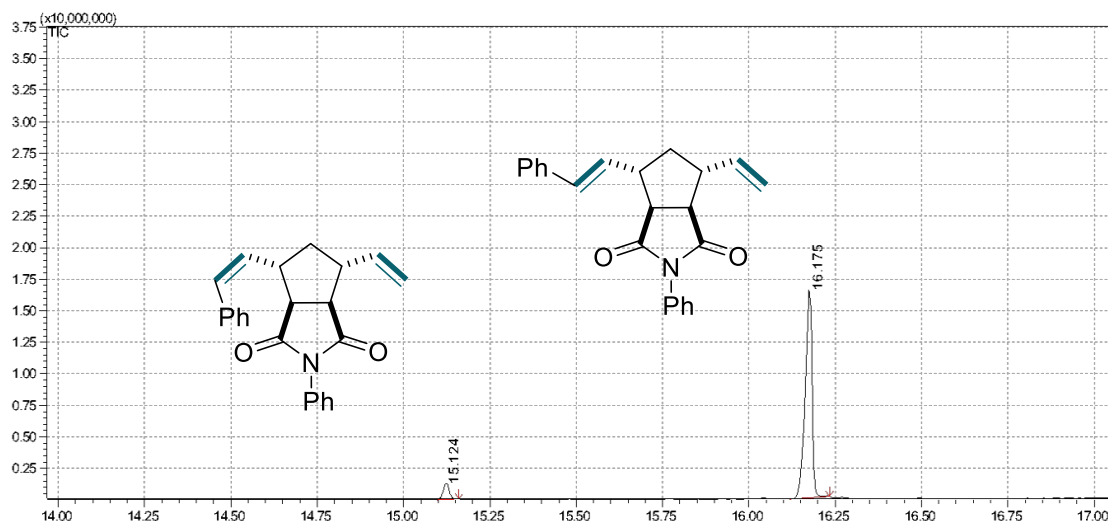

| Peak | Retention time [min] | Area     | Area [%] |
|------|----------------------|----------|----------|
| 1    | 15.124               | 1497562  | 6.14     |
| 2    | 16.175               | 22892639 | 93.86    |

## 3-(1,3-dioxo-2-phenyl-6-vinyloctahydrocyclopenta[c]pyrrol-4-yl)allyl acetate (6b)

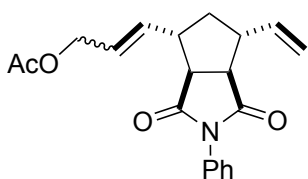

Chemical Formula:  $C_{20}H_{21}NO_4$   
Molecular Weight: 339,39

(6b) was obtained upon reaction with allyl acetate **10** (0.5 mmol, 55  $\mu$ L, 5.0 equiv.) as CM partner with 88% NMR yield, E/Z 9/1. Conversion and yield were attributed based on the characteristic signal at 2.9 ppm (m, 2H). The data were consistent with the reported literature.<sup>10</sup>

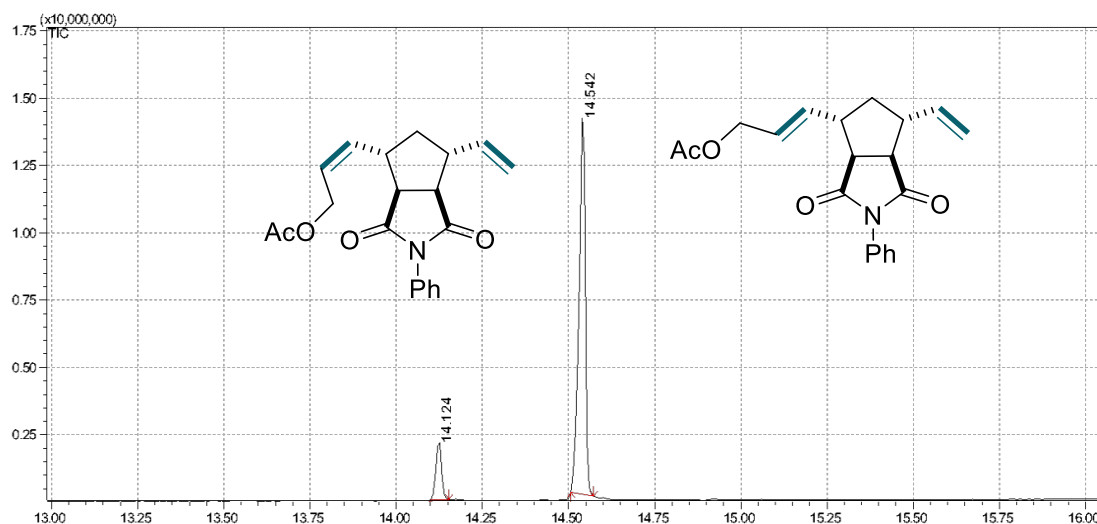

| Peak | Retention time [min] | Area     | Area [%] |
|------|----------------------|----------|----------|
| 1    | 14.124               | 2500314  | 12.09    |
| 2    | 14.542               | 18175095 | 87.91    |

#### 4-(dec-1-en-1-yl)-2-phenyl-6-vinyltetrahydrocyclopenta[c]pyrrole-1,3(2H,3aH)-dione (6c)

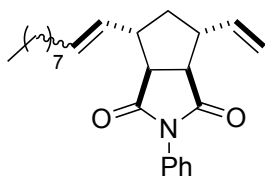

Chemical Formula:  $C_{25}H_{33}NO_2$   
Molecular Weight: 379,54

(6c) was obtained upon reaction with 1-decene (0.5 mmol, 85  $\mu$ L, 5.0 equiv.) as CM partner with 71% NMR yield, E/Z 85/15. Conversion and yield were attributed based on the characteristic signal at 2.95-2.8 ppm (m, 2H). The data were consistent with the reported literature.<sup>11</sup>

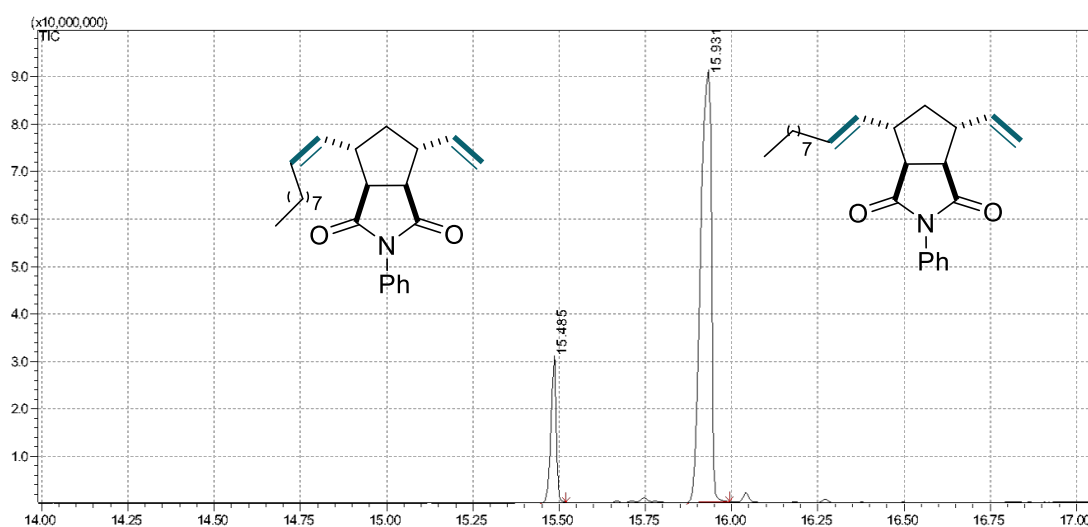

| Peak | Retention time [min] | Area      | Area [%] |
|------|----------------------|-----------|----------|
| 1    | 15.485               | 31926932  | 13.94    |
| 2    | 15.931               | 197073301 | 86.06    |

### 2.5.5.1 Ring opening cross metathesis of cyclooctene

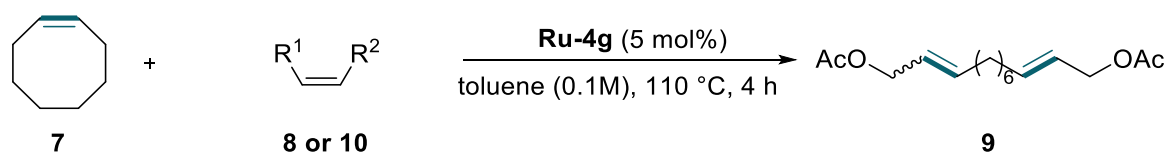

In the glovebox, in an oven-dried Schlenk, cyclooctene **7** (1.0 equiv.) and the olefin partner (4.0 equiv.) were diluted in toluene (1 mL). **Ru-4g** complex (0.005 mmol, 3.9 mg, 5 mol%) was dissolved in toluene (1 mL) and introduced in the reaction mixture, which was allowed to stir at 110°C during 4 hours. The completion was monitored by and <sup>1</sup>H-NMR. 1,3,5-trimethoxybenzene as internal standard (0.1 mmol, 16.8 mg, 1.0 equiv.)

#### dodeca-2,10-diene-1,12-diyl diacetate (**9**)

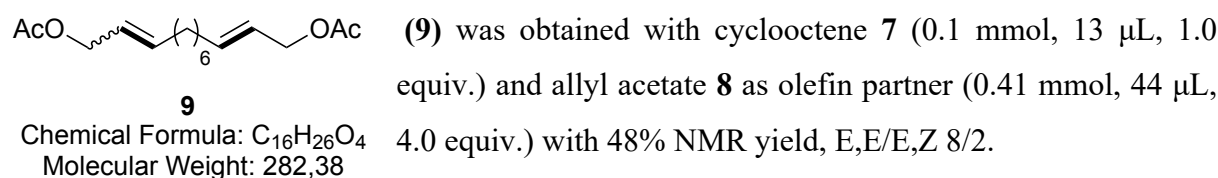

The same reaction with cyclooctene **7** (0.2 mmol, 25  $\mu$ L, 1.0 equiv.) and cis-diacetoxybut-2-ene **10** (0.8 mmol, 130  $\mu$ L, 4.0 equiv.) as olefin partner afforded 38% NMR yield, 25% isolated yield E,E/E,Z 8/2. The data were consistent with the reported literature.<sup>12</sup>

<sup>1</sup>H NMR (400 MHz, CDCl<sub>3</sub>)  $\delta$  5.78 – 5.74 (m, 2H), 5.59 – 5.52 (m, 2H), 4.50 (dt, *J* = 6.4, 1.0 Hz, 4H), 2.08 – 2.06 (m, 10H), 1.44 – 1.27 (m, 8H).

## 2.5.6 General procedure for cross metathesis

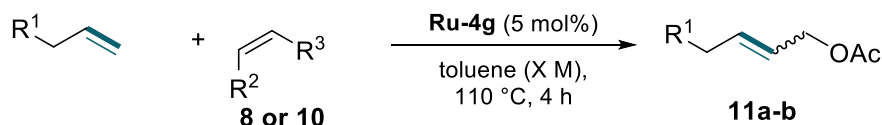

In an Ar-filled glovebox, an oven-dried vial was filled with acetate derivative (1.0 equiv. or 4 equiv.), degassed CM partner (1.0 equiv. or 2.5 equiv.) and toluene (0.5 mL or 2 mL). The solution of **Ru-4g** complex (0.005 mmol, 3.9 mg, 5 mol%) in toluene was then added and the mixture was stirred for 4 hours at 110 °C. The conversion was monitored by <sup>1</sup>H NMR. 1,3,5-trimethoxybenzene as internal standard (0.1 mmol, 16.8 mg, 1.0 equiv.)

### tridec-2-en-1-yl acetate (**11a**)

 (**11a**) was obtained from 1-dodecene (0.25 mmol, 56 μL, 2.5 equiv.) as olefin partner and cis-diacetoxybut-2-ene **10** (0.1 mmol, 16 μL, 1.0 equiv.) in toluene (0.2M) with 81% NMR yield 88% conversion, E/Z 8/2. The same experiment with allyl acetate **8** (0.1 mmol, 11 μL, 1.0 equiv.) as olefin partner afforded 51% NMR yield 75% conversion, E/Z 85/15. The data were consistent with the reported literature.<sup>13</sup>

<sup>1</sup>H NMR (400 MHz, CDCl<sub>3</sub>) given as E/Z mixture δ 5.82 – 5.71 (m, 2H, Z isomer), 5.68 – 5.47 (m, 2H, E isomer), 4.61 (dd, *J* = 6.9, 1.3 Hz, 2H, Z isomer), 4.50 (dd, *J* = 6.6, 1.1 Hz, 2H, E isomer), 2.05 (m, 5H), 1.42 – 1.19 (m, 16H), 0.91 – 0.83 (m, 3H).

### 4-phenylbut-2-en-1-yl acetate (**11b**)

 (**11b**) was obtained from allyl benzene (0.2 mmol, 25 μL, 1.0 equiv.) as CM partner and cis-diacetoxybut-2-ene **10** (0.8 mmol, 130 μL, 4.0 equiv.) in toluene (0.1M) with 58% isolated yield (22 mg), E/Z 9/1. The data were consistent with the reported literature.<sup>14</sup>

<sup>1</sup>H NMR (400 MHz, CDCl<sub>3</sub>) (E/Z mixture) δ 7.33 – 7.27 (m, 2H), 7.24 – 7.16 (m, 3H), 5.98 – 5.79 (m, 1H), 5.63 (dt, *J* = 15.5, 6.4, 1.5 Hz, 1H), 4.77 – 4.52 (m, 2H), 3.50 – 3.37 (m, 2H), 2.07 (s, 3H).

## 2.6 Solid state structure obtained by X-ray diffraction

### 2.6.1 *N*-isopropyl CABC Hoveyda type Ru complex (Ru-4a) [JM-659]

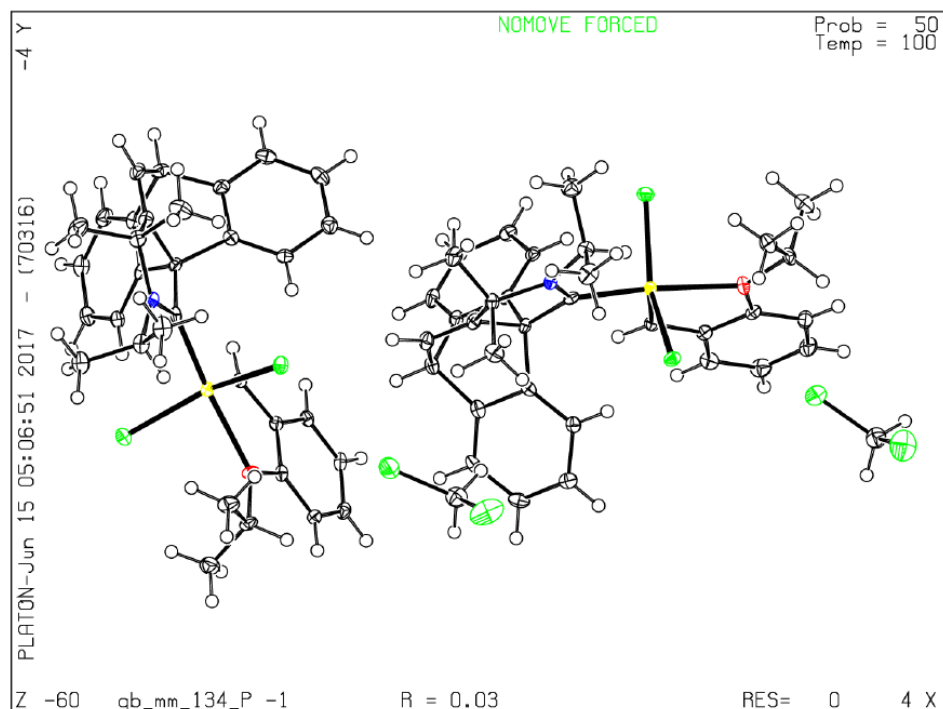

Bond precision: C-C = 0.0030 Å

Wavelength=0.71073

Cell: a=11.759(2) b=16.076(3) c=18.341(3)  
alpha=110.149(6) beta=96.057(6) gamma=90.840(6)  
Temperature: 100 K

|                        | Calculated                      | Reported                        |
|------------------------|---------------------------------|---------------------------------|
| Volume                 | 3232.0(10)                      | 3231.9(10)                      |
| Space group            | P -1                            | P -1                            |
| Hall group             | -P 1                            | -P 1                            |
| Moiety formula         | C33 H35 C12 N O Ru, C H2<br>C12 | C33 H35 C12 N O Ru, C H2<br>C12 |
| Sum formula            | C34 H37 C14 N O Ru              | C34 H37 C14 N O Ru              |
| Mr                     | 718.52                          | 718.51                          |
| Dx, g cm <sup>-3</sup> | 1.477                           | 1.477                           |
| Z                      | 4                               | 4                               |
| Mu (mm <sup>-1</sup> ) | 0.844                           | 0.844                           |
| F000                   | 1472.0                          | 1472.0                          |
| F000'                  | 1469.71                         |                                 |
| h,k,lmax               | 15,20,23                        | 15,20,23                        |
| Nref                   | 14322                           | 14226                           |
| Tmin,Tmax              | 0.859,0.881                     | 0.468,0.491                     |
| Tmin'                  | 0.852                           |                                 |

Correction method= # Reported T Limits: Tmin=0.468 Tmax=0.491  
AbsCorr = MULTI-SCAN

Data completeness= 0.993

Theta(max)= 27.136

R(reflections)= 0.0290( 11994)

wR2(reflections)= 0.0683( 14226)

S = 1.033

Npar= 751



## 2.6.2 N-Adamantyl CABC Hoveyda type Ru complex (Ru-4b) [JAT-168]

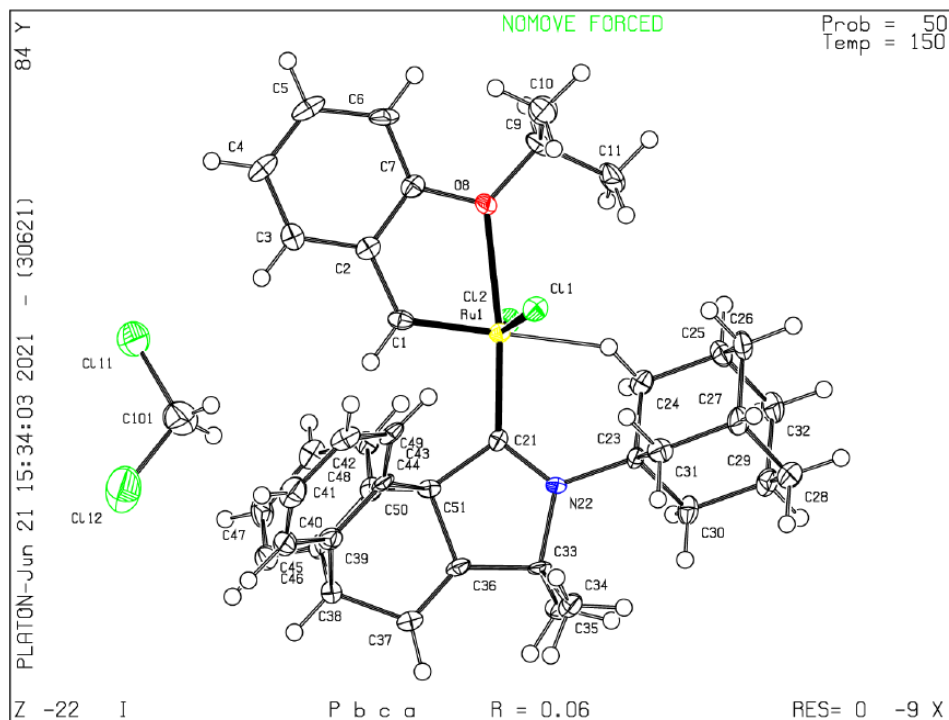

Bond precision: C-C = 0.0073 Å

Wavelength=0.71073

Cell: a=18.6545 (12) b=16.0577 (13) c=23.8797 (16)  
 alpha=90 beta=90 gamma=90

Temperature: 150 K

|                        | Calculated               | Reported                 |
|------------------------|--------------------------|--------------------------|
| Volume                 | 7153.1 (9)               | 7153.1 (9)               |
| Space group            | P b c a                  | P b c a                  |
| Hall group             | -P 2ac 2ab               | -P 2ac 2ab               |
| Moiety formula         | C40 H43 Cl2 N O Ru, C H2 | C40 H43 Cl2 N O Ru, C H2 |
|                        | C12                      | C12                      |
| Sum formula            | C41 H45 Cl4 N O Ru       | C41 H45 Cl4 N O Ru       |
| Mr                     | 810.65                   | 810.65                   |
| Dx, g cm <sup>-3</sup> | 1.505                    | 1.505                    |
| Z                      | 8                        | 8                        |
| Mu (mm <sup>-1</sup> ) | 0.772                    | 0.772                    |
| F000                   | 3344.0                   | 3344.0                   |
| F000'                  | 3339.56                  |                          |
| h,k,lmax               | 24, 20, 31               | 24, 20, 30               |
| Nref                   | 8202                     | 8114                     |
| Tmin, Tmax             | 0.806, 0.947             | 0.841, 0.947             |
| Tmin'                  | 0.806                    |                          |

Correction method= # Reported T Limits: Tmin=0.841 Tmax=0.947

AbsCorr = MULTI-SCAN

Data completeness= 0.989

Theta(max)= 27.482

R(reflections)= 0.0576 ( 4168)

wR2(reflections)= 0.1307 ( 8114)

S = 0.991

Npar= 437

## 2.6.3 N-Phenyl CABC Hoveyda type Ru complex (Ru-4c) [JAT-150]

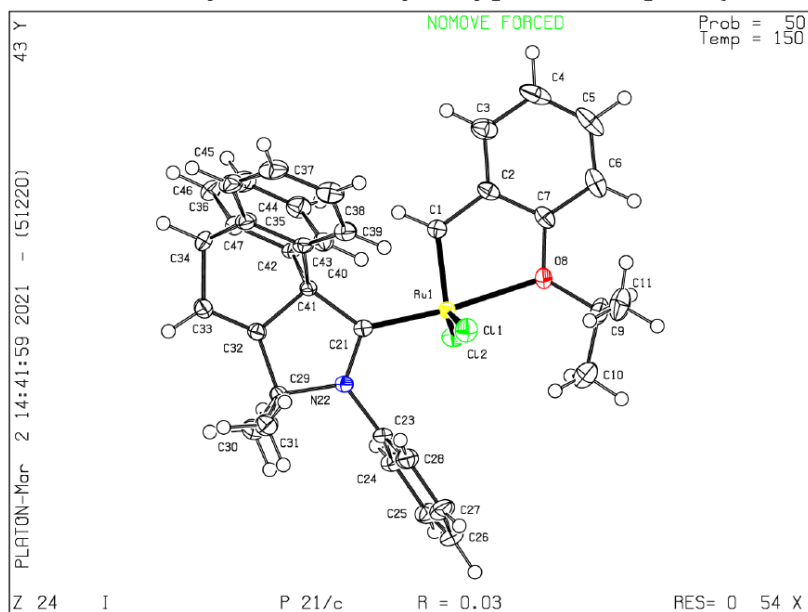

Bond precision: C-C = 0.0033 Å Wavelength=0.71073

Cell: a=12.2592 (11) b=14.8980 (13) c=19.906 (2)  
 alpha=90 beta=99.104 (4) gamma=90  
 Temperature: 150 K

|                        | Calculated                     | Reported           |
|------------------------|--------------------------------|--------------------|
| Volume                 | 3589.8 (6)                     | 3589.7 (6)         |
| Space group            | P 21/c                         | P 21/c             |
| Hall group             | -P 2ybc                        | -P 2ybc            |
| Moiety formula         | C36 H33 Cl2 N O Ru [+ solvent] | C36 H33 Cl2 N O Ru |
| Sum formula            | C36 H33 Cl2 N O Ru [+ solvent] | C36 H33 Cl2 N O Ru |
| Mr                     | 667.60                         | 667.60             |
| Dx, g cm <sup>-3</sup> | 1.235                          | 1.235              |
| Z                      | 4                              | 4                  |
| Mu (mm <sup>-1</sup> ) | 0.611                          | 0.611              |
| F000                   | 1368.0                         | 1368.0             |
| F000'                  | 1364.54                        |                    |
| h, k, lmax             | 15, 19, 25                     | 15, 19, 25         |
| Nref                   | 8275                           | 8230               |
| Tmin, Tmax             | 0.732, 0.890                   | 0.757, 0.890       |
| Tmin'                  | 0.716                          |                    |

Correction method= # Reported T Limits: Tmin=0.757 Tmax=0.890  
 AbsCorr = MULTI-SCAN

Data completeness= 0.995 Theta (max)= 27.540

R(reflections)= 0.0334 ( 6891) wR2(reflections)= 0.0874 ( 8230)

S = 1.051 Npar= 374

## 2.6.4 N-Mesityl CABC Hoveyda type Ru complex (Ru-4d) [JAT-157]

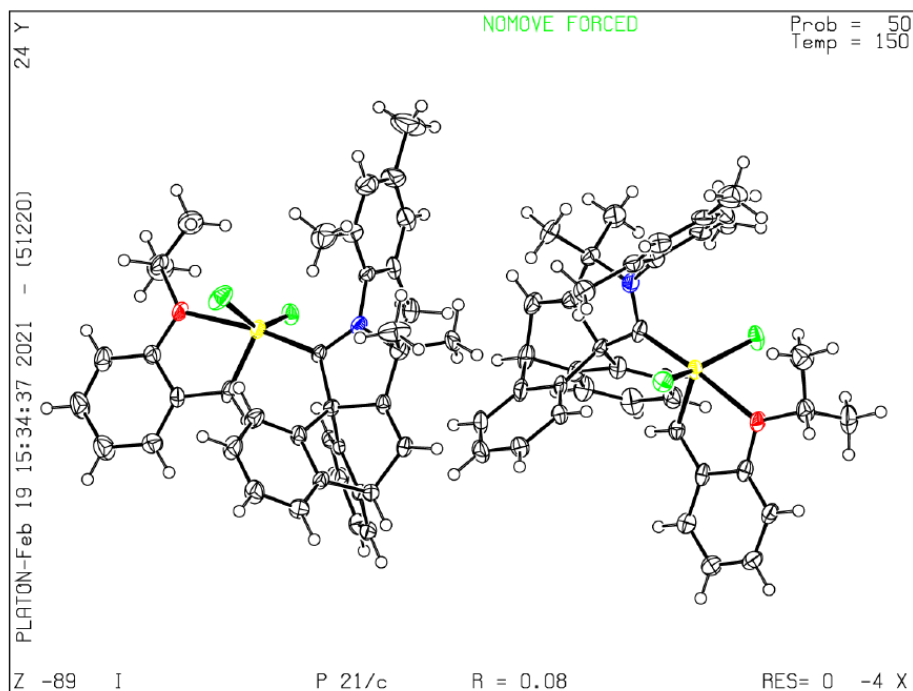

Bond precision: C-C = 0.0098 Å Wavelength=0.71073

Cell: a=19.3116(15) b=24.5754(19) c=16.7833(11)  
 alpha=90 beta=106.051(2) gamma=90

Temperature: 150 K

|                        | Calculated                     | Reported           |
|------------------------|--------------------------------|--------------------|
| Volume                 | 7654.7(10)                     | 7654.7(10)         |
| Space group            | P 21/c                         | P 21/c             |
| Hall group             | -P 2ybc                        | -P 2ybc            |
| Moiety formula         | C39 H39 C12 N O Ru [+ solvent] | C39 H39 C12 N O Ru |
| Sum formula            | C39 H39 C12 N O Ru [+ solvent] | C39 H39 C12 N O Ru |
| Mr                     | 709.68                         | 709.68             |
| Dx, g cm <sup>-3</sup> | 1.232                          | 1.232              |
| Z                      | 8                              | 8                  |
| Mu (mm <sup>-1</sup> ) | 0.577                          | 0.577              |
| F000                   | 2928.0                         | 2928.0             |
| F000'                  | 2921.14                        |                    |
| h, k, lmax             | 25, 32, 21                     | 25, 31, 21         |
| Nref                   | 17696                          | 16790              |
| Tmin, Tmax             | 0.735, 0.989                   | 0.723, 0.989       |
| Tmin'                  | 0.708                          |                    |

Correction method= # Reported T Limits: Tmin=0.723 Tmax=0.989  
 AbsCorr = MULTI-SCAN

Data completeness= 0.949 Theta(max)= 27.566

R(reflections)= 0.0819( 12650) wR2(reflections)= 0.2096( 16790)

S = 1.000 Npar= 807



## 2.7 NMR spectra

### 2.7.1 $^1\text{H}$ NMR (400 MHz, $\text{CDCl}_3$ ) of Ru-4a

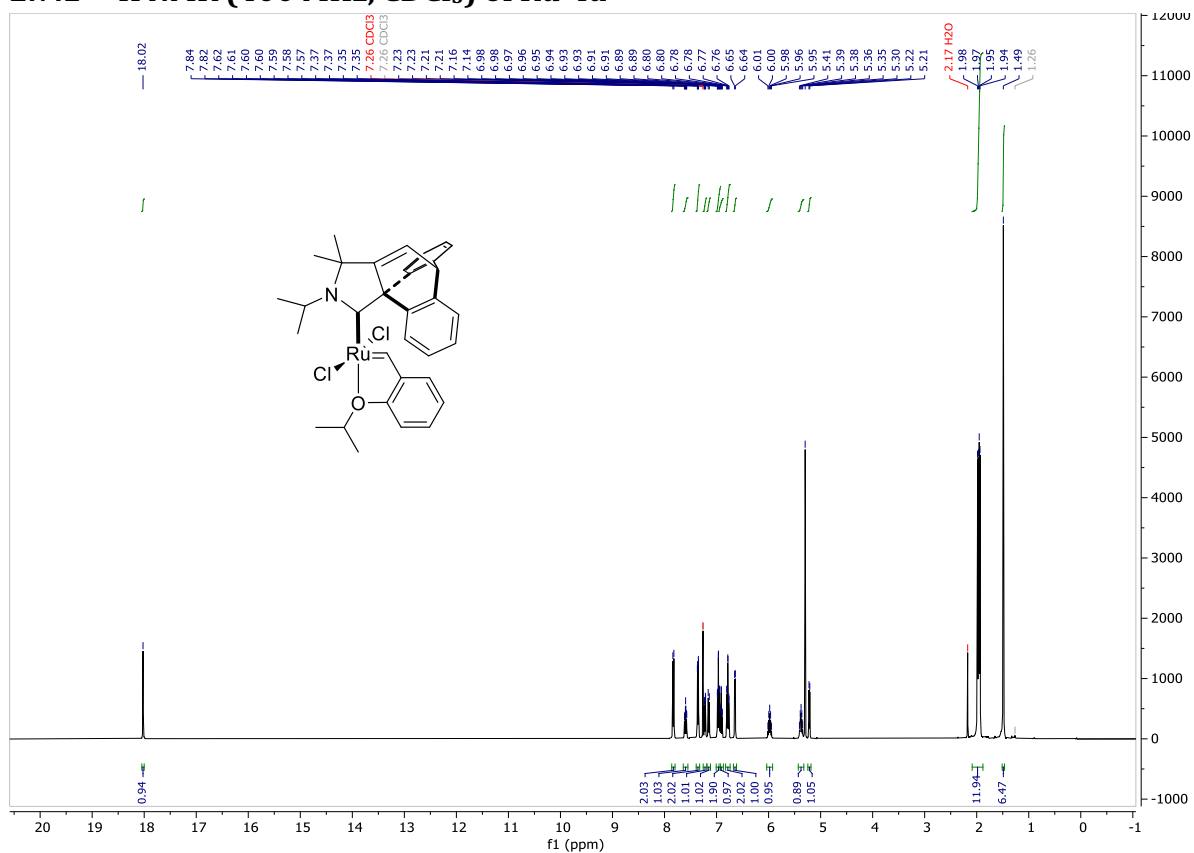

### 2.7.2 $^{13}\text{C}$ NMR (101 MHz, $\text{CDCl}_3$ ) of Ru-4a

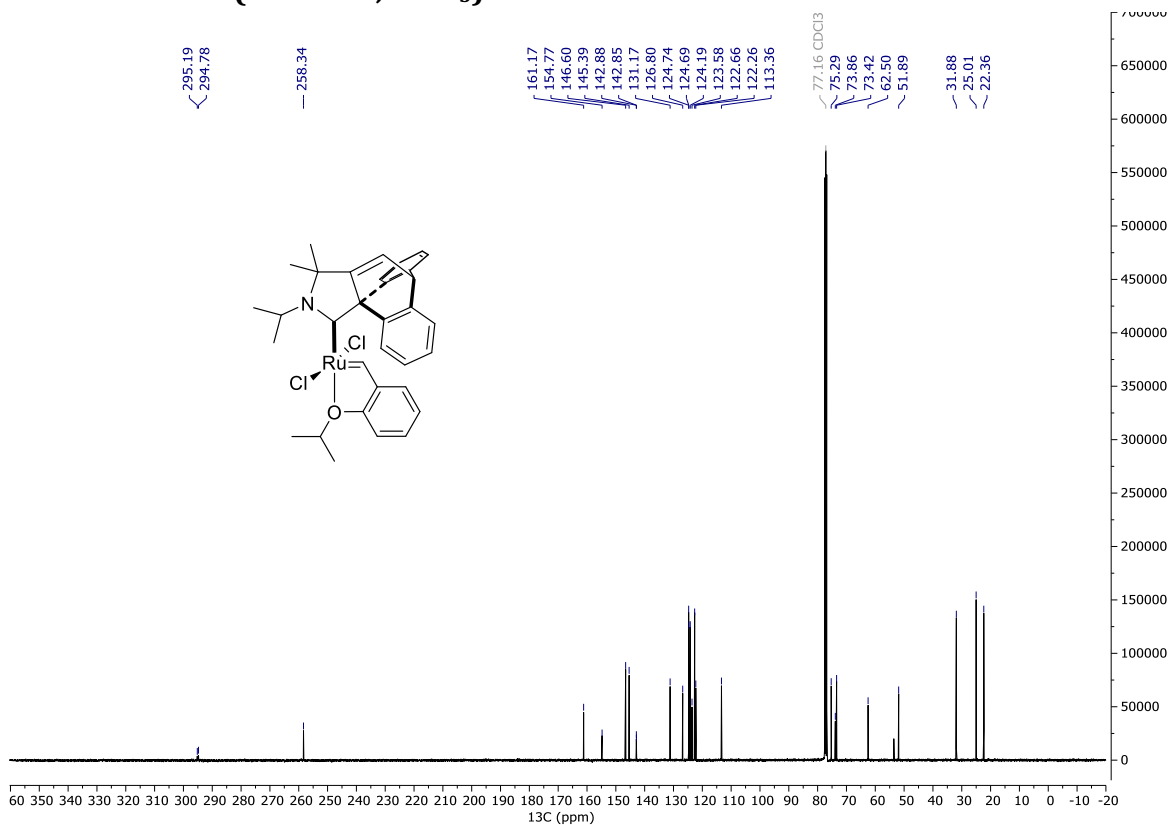

### 2.7.3 $^1\text{H}$ NMR (400 MHz, $\text{CDCl}_3$ ) of Ru-4b

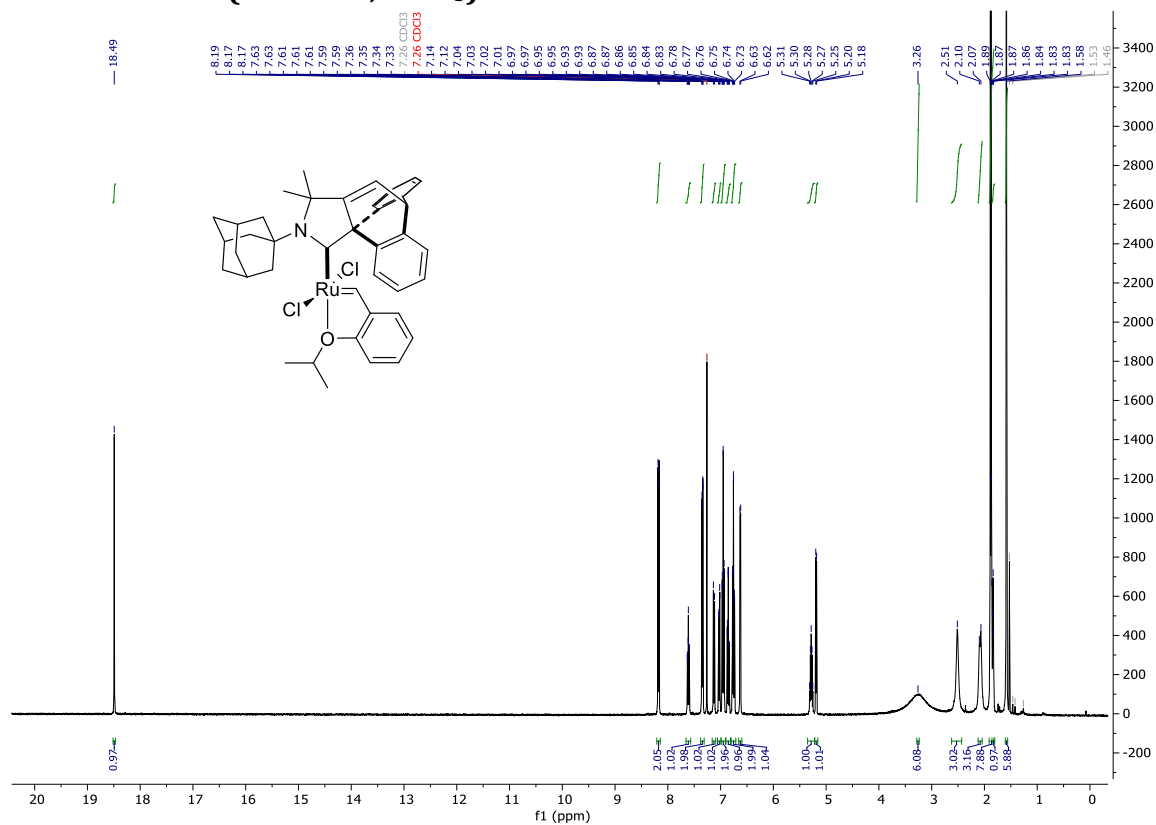

### 2.7.4 $^{13}\text{C}$ NMR (101 MHz, $\text{CDCl}_3$ ) of Ru-4b

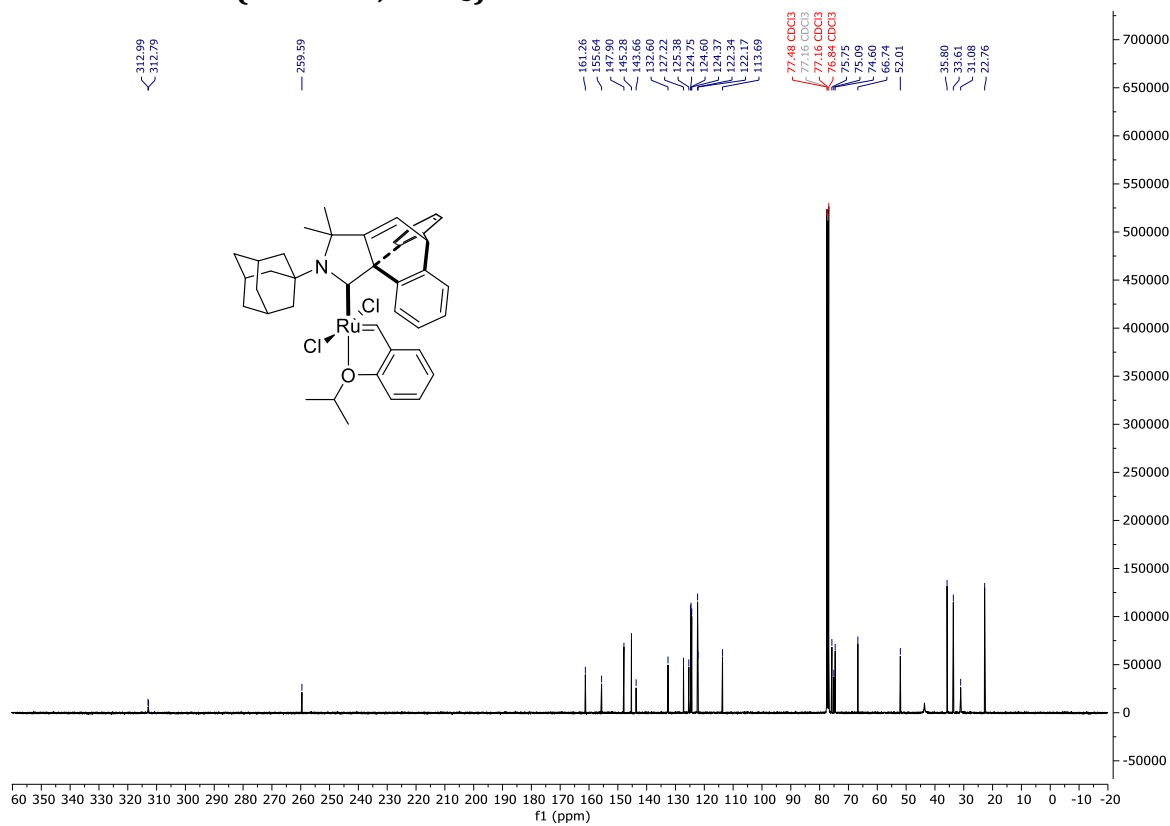

## 2.7.5 <sup>1</sup>H NMR (400 MHz, CDCl<sub>3</sub>) of Ru-4c

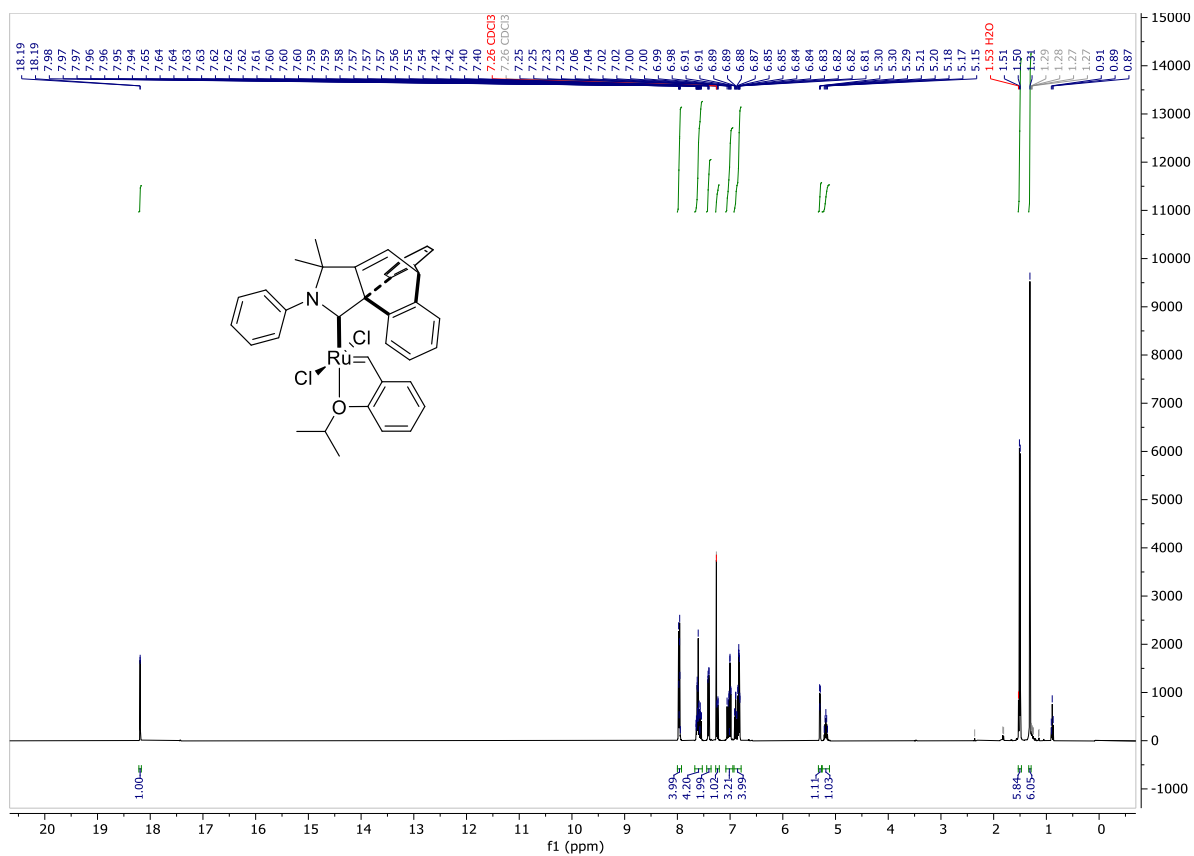

## 2.7.6 <sup>13</sup>C NMR (101 MHz, CDCl<sub>3</sub>) of Ru-4c

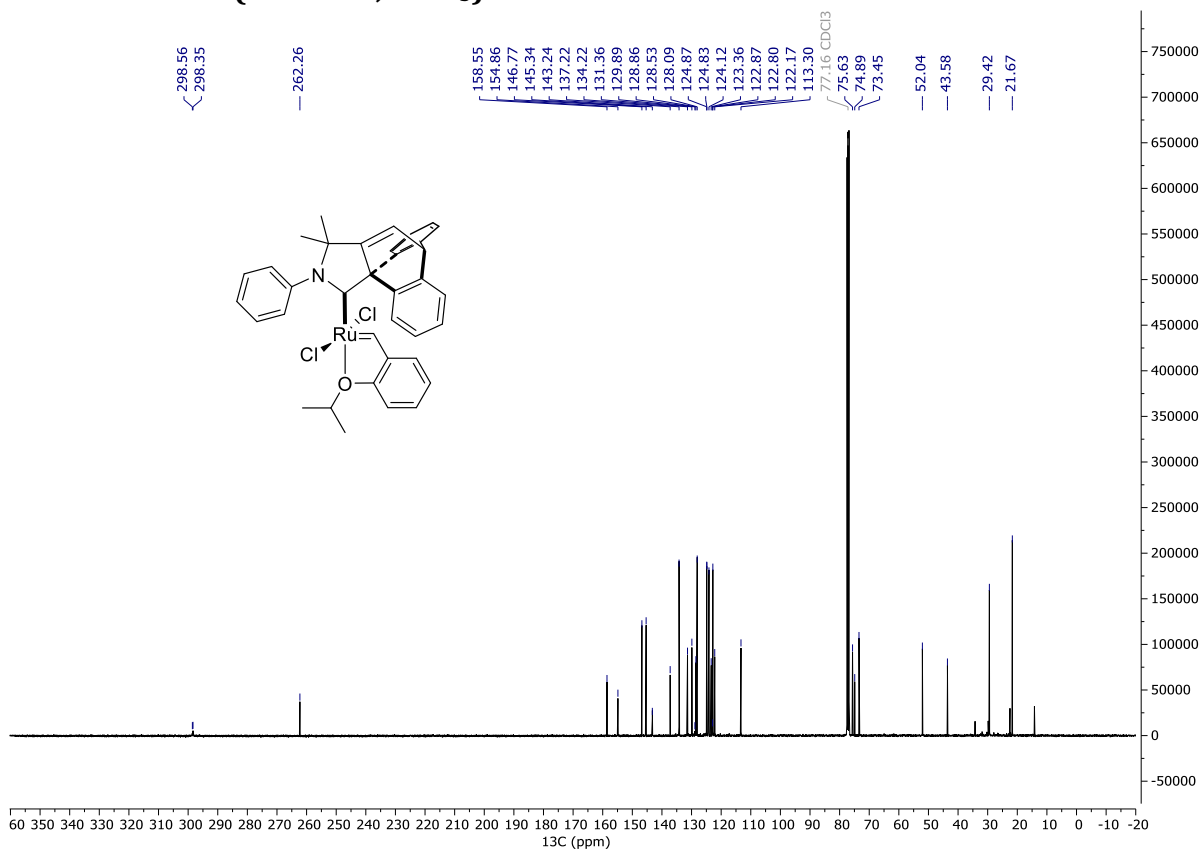





### 2.7.9 $^1\text{H}$ NMR (400 MHz, $\text{C}_6\text{D}_6$ ) of Ru-4e

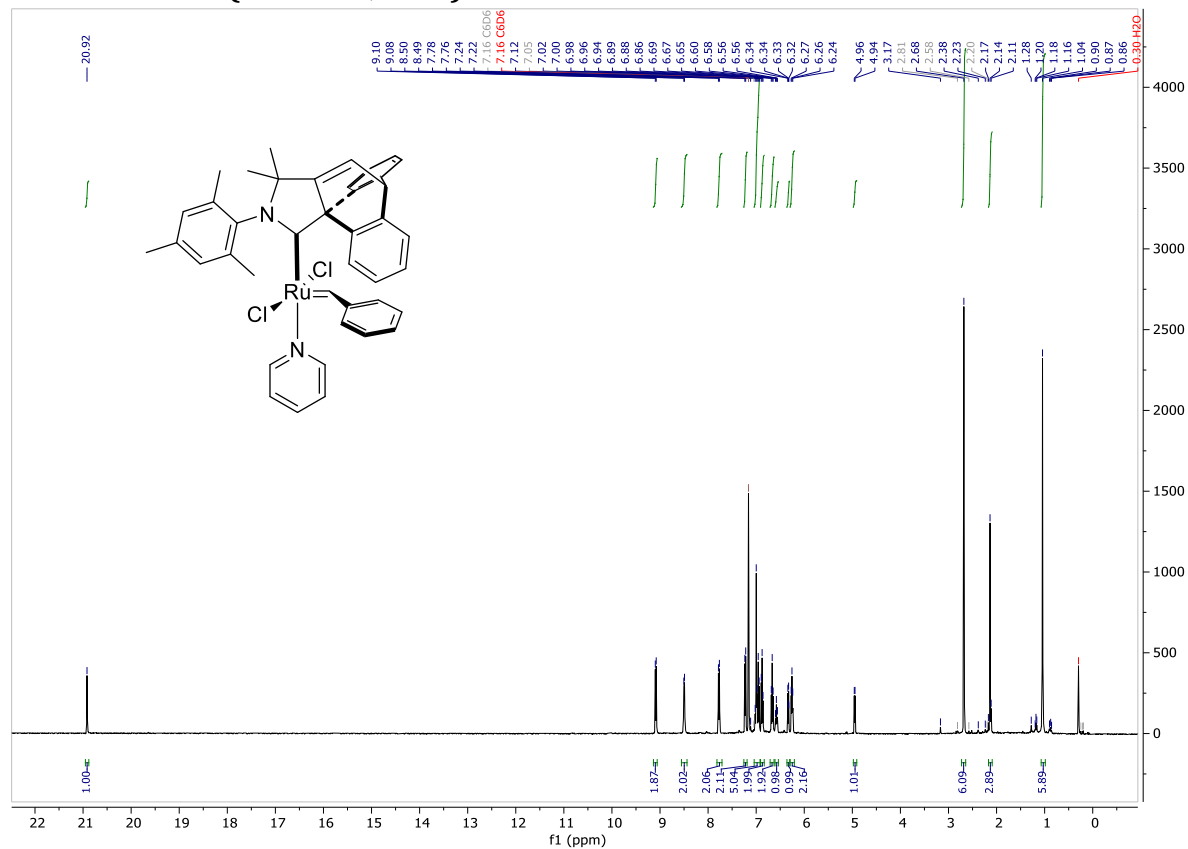

### 2.7.10 $^{13}\text{C}$ NMR (101 MHz, $\text{C}_6\text{D}_6$ ) of Ru-4e

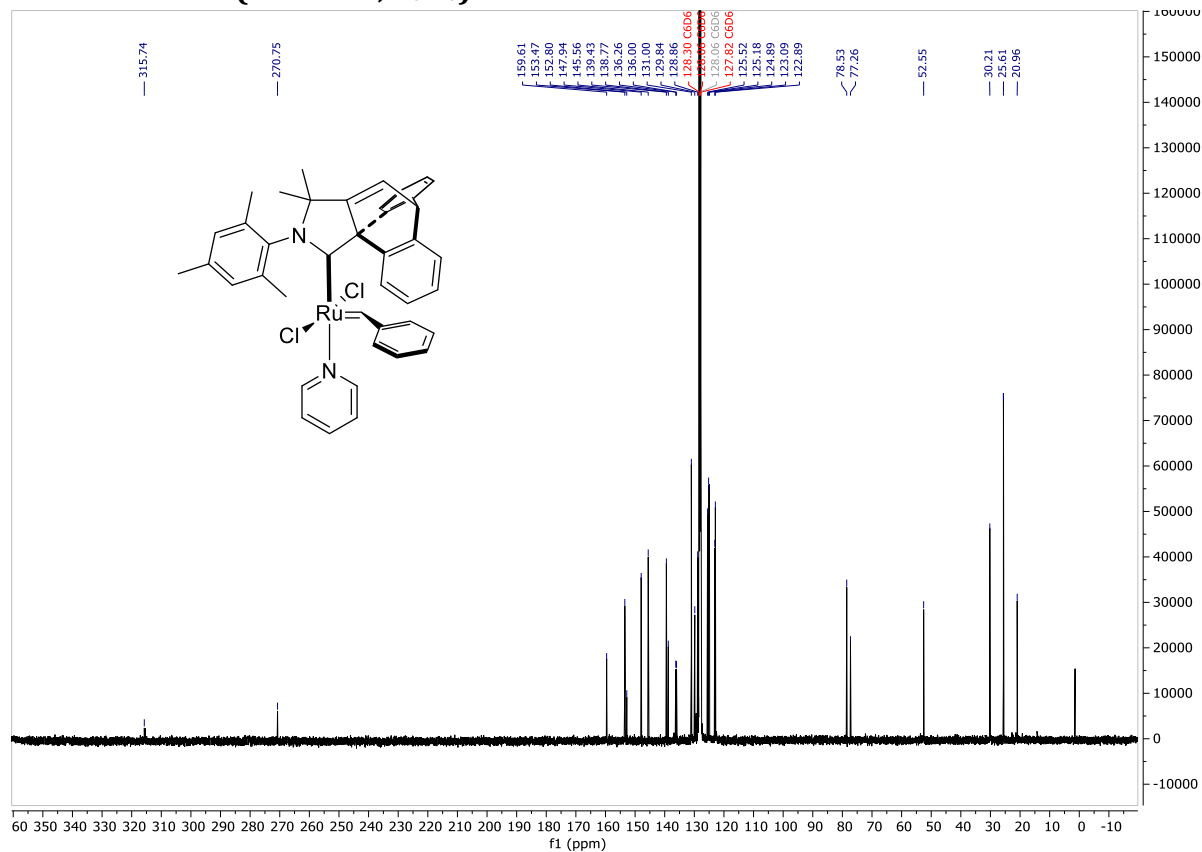

### 2.7.11 <sup>1</sup>H NMR (400 MHz, CDCl<sub>3</sub>) of Ru-4f

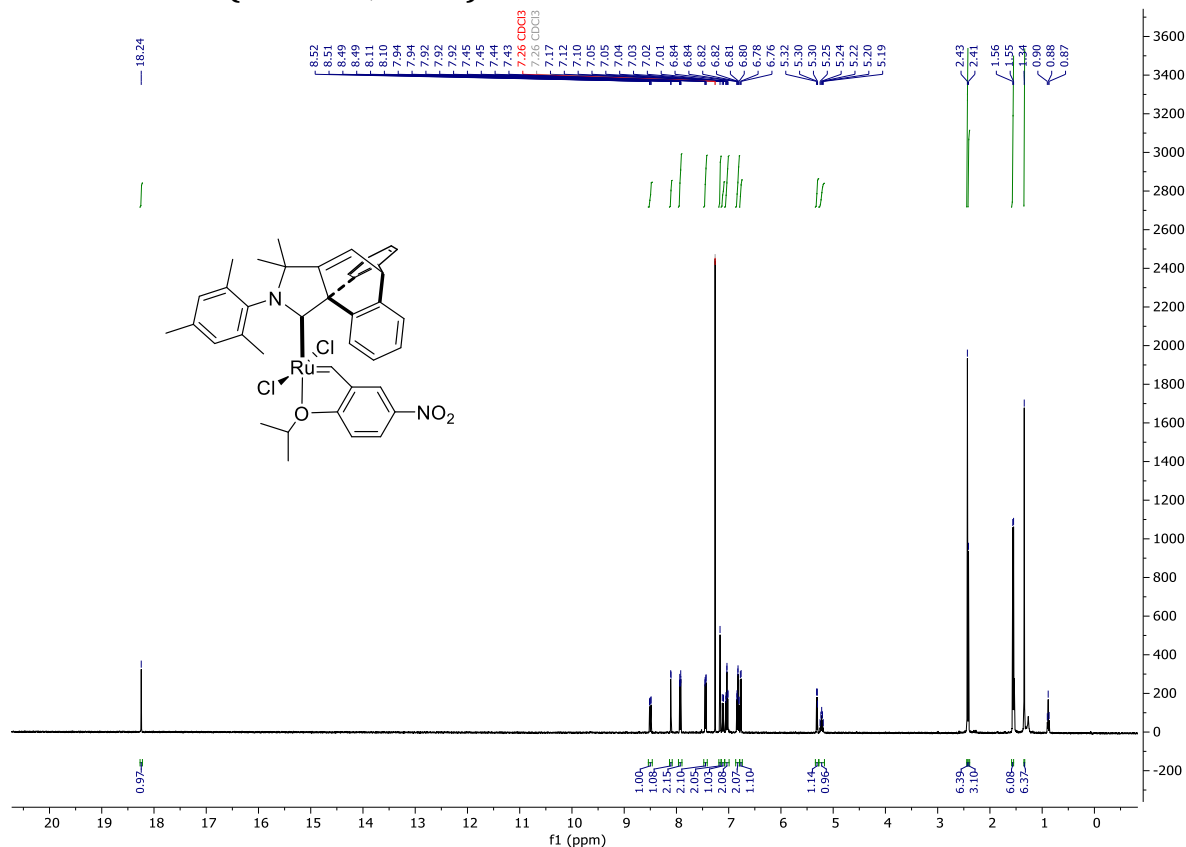

### 2.7.12 <sup>13</sup>C NMR (101 MHz, CDCl<sub>3</sub>) of Ru-4f

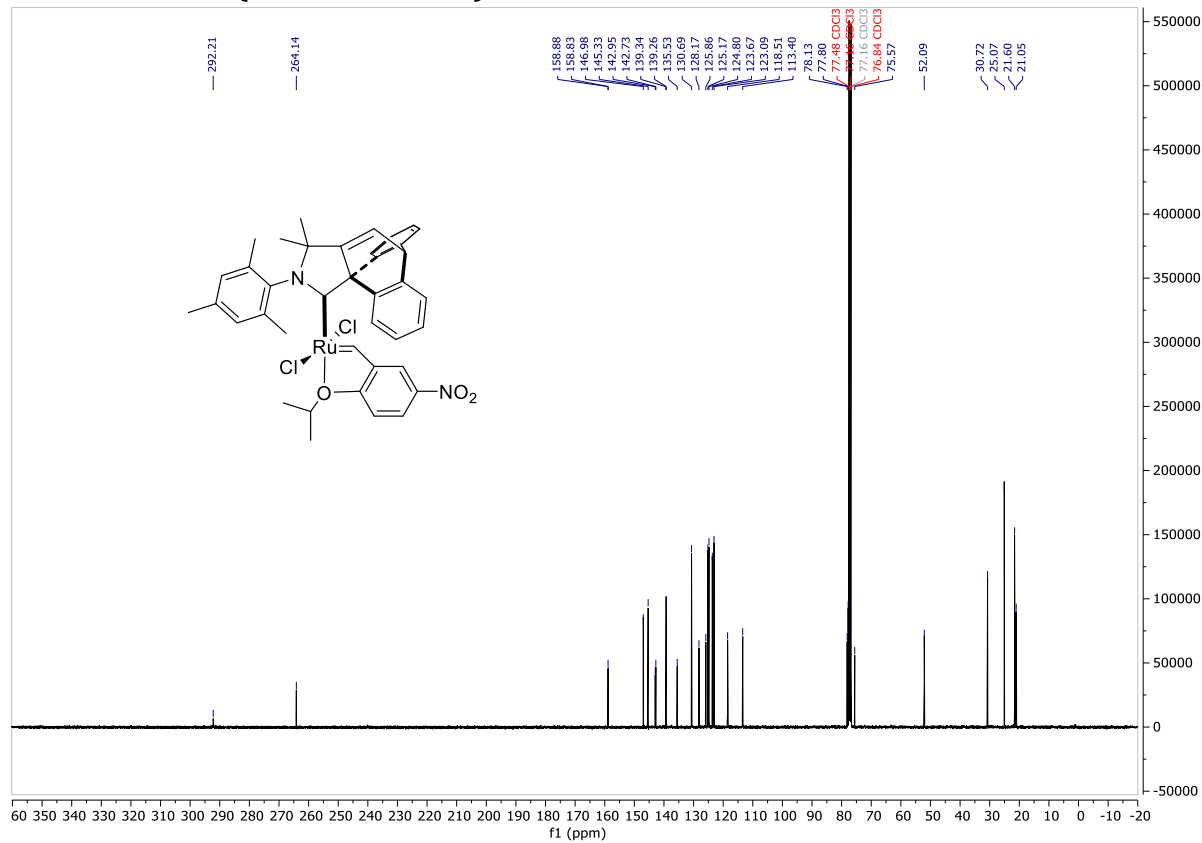

### 2.7.13 <sup>1</sup>H NMR (400 MHz, CDCl<sub>3</sub>) of Ru-4g

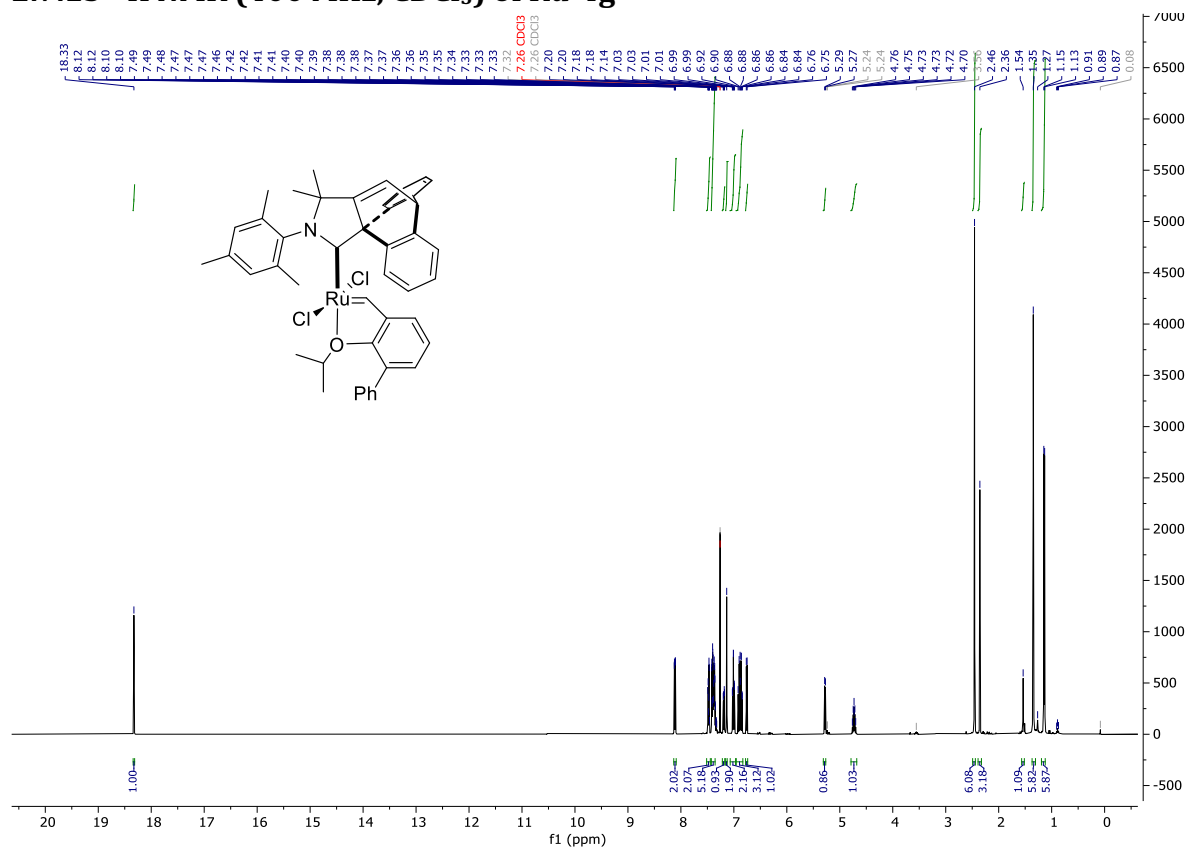

### 2.7.14 <sup>13</sup>C NMR (101 MHz, CDCl<sub>3</sub>) of Ru-4g

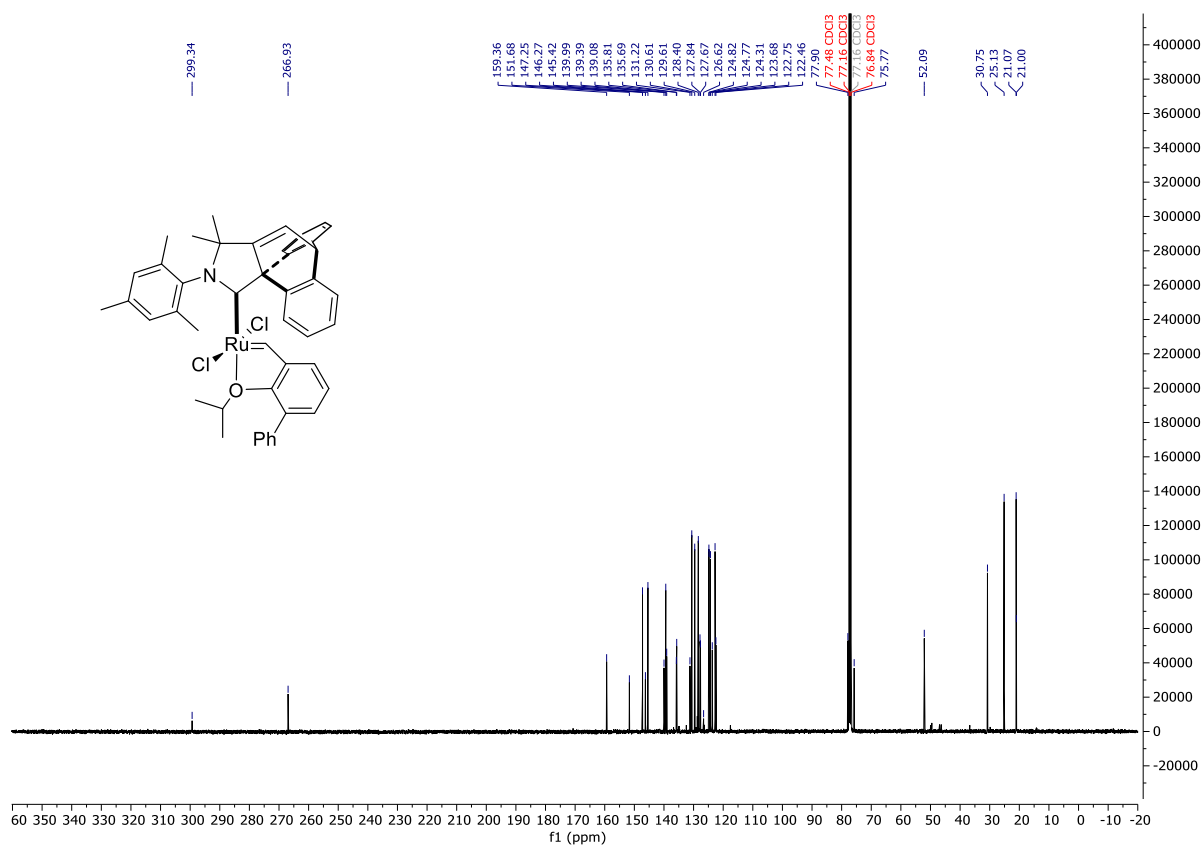

## 2.7.15 Catalytic products

### <sup>1</sup>H NMR (400 MHz, toluene-d<sub>8</sub>) (2a)

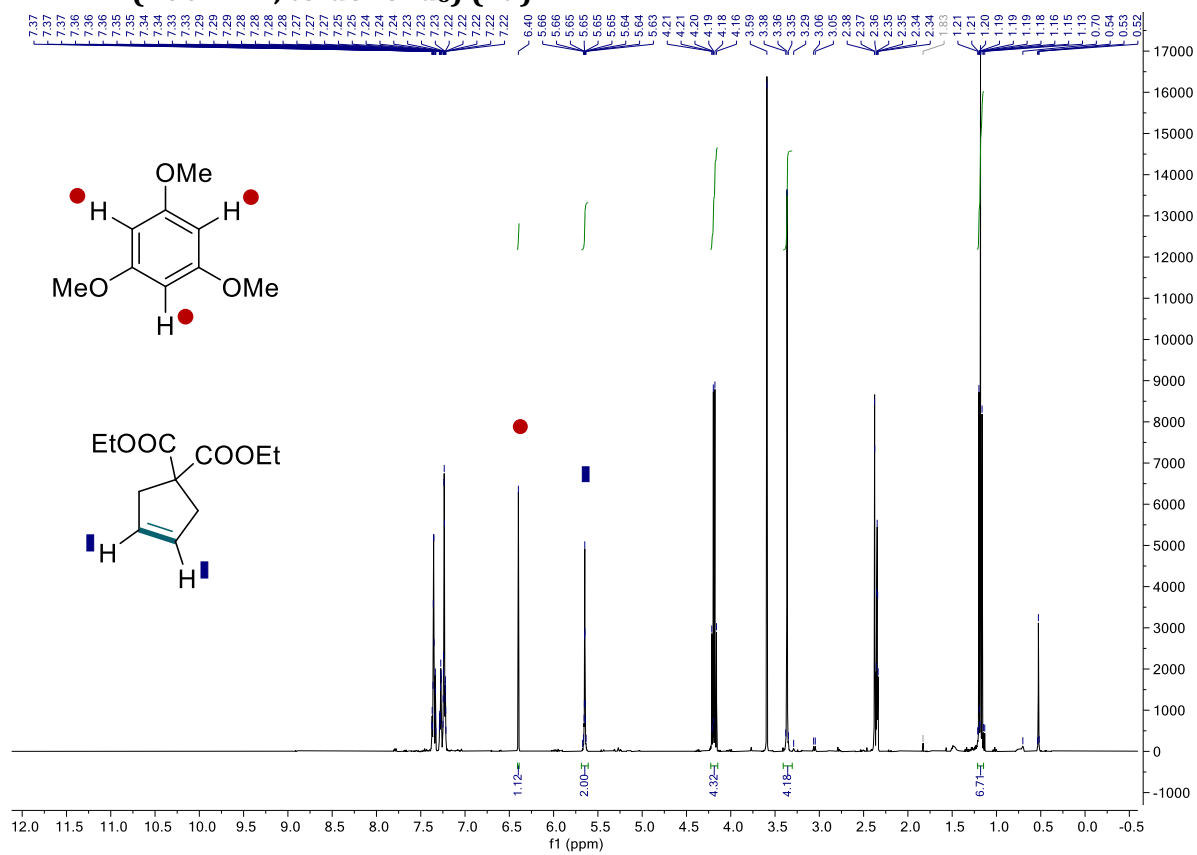

### <sup>1</sup>H NMR (400 MHz, CDCl<sub>3</sub>) (2b)

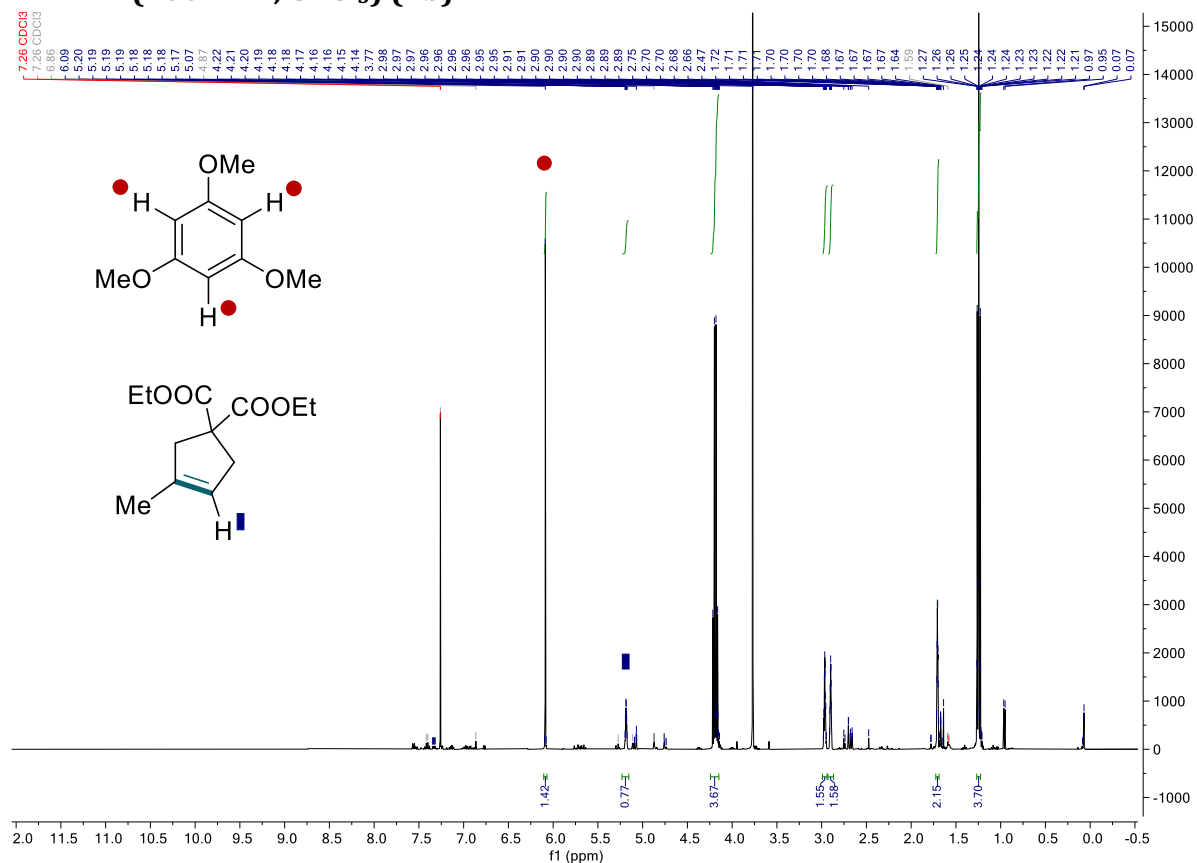

**<sup>1</sup>H NMR (400 MHz, CDCl<sub>3</sub>) (2d)**

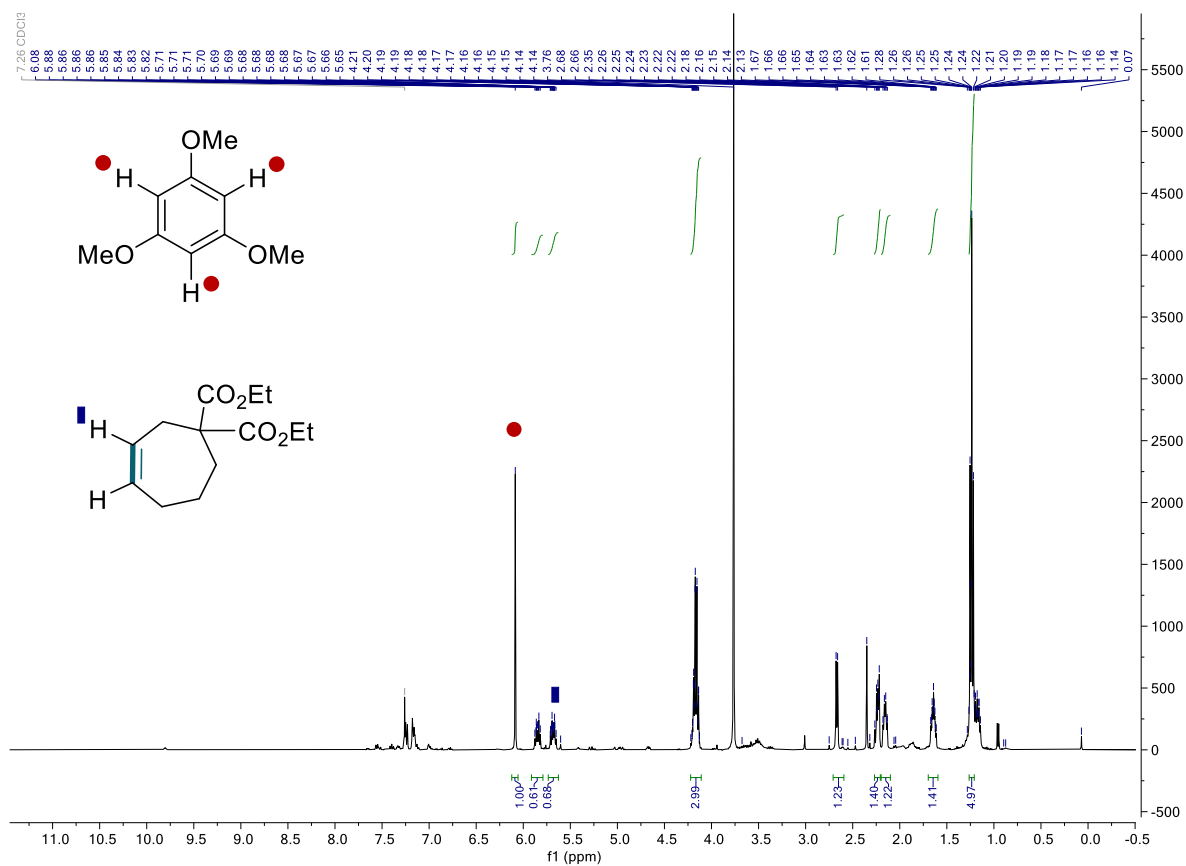

**<sup>1</sup>H NMR (400 MHz, CDCl<sub>3</sub>) (2e)**

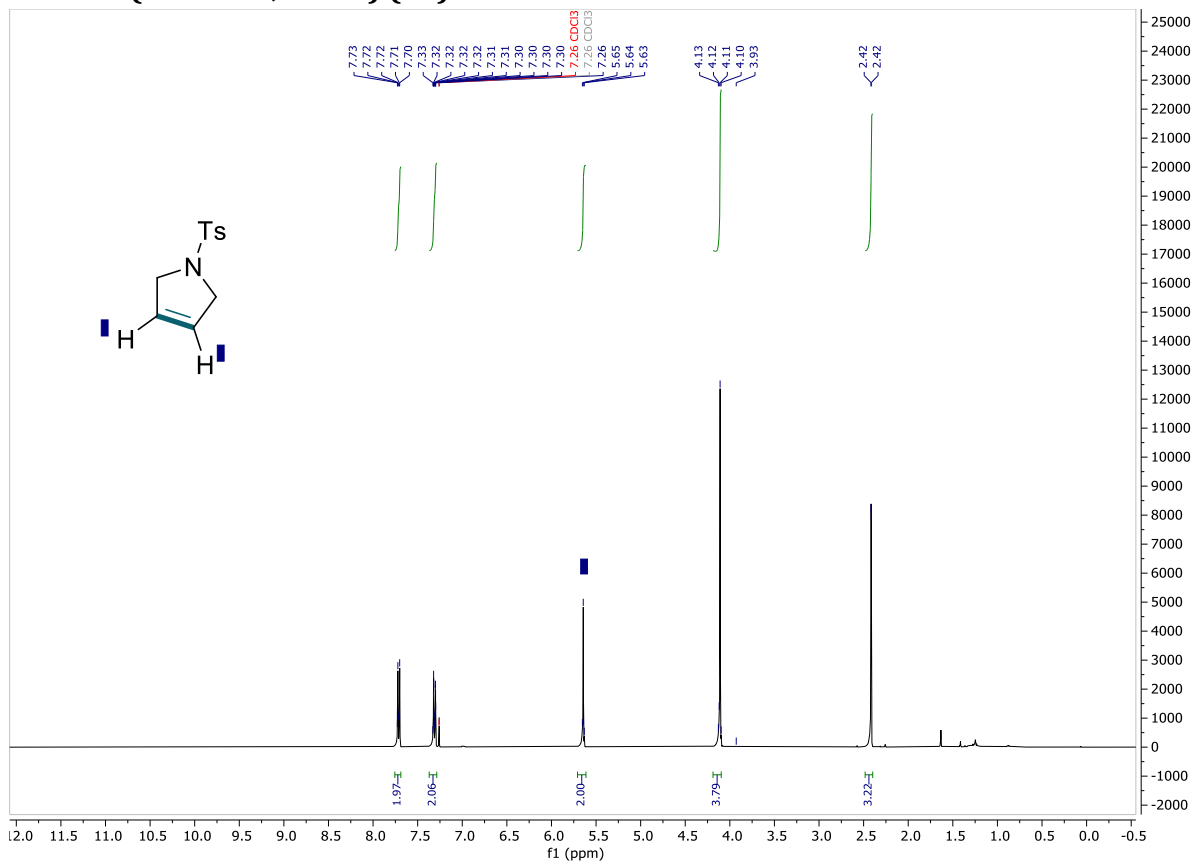

### <sup>1</sup>H NMR (400 MHz, CDCl<sub>3</sub>) (2f)

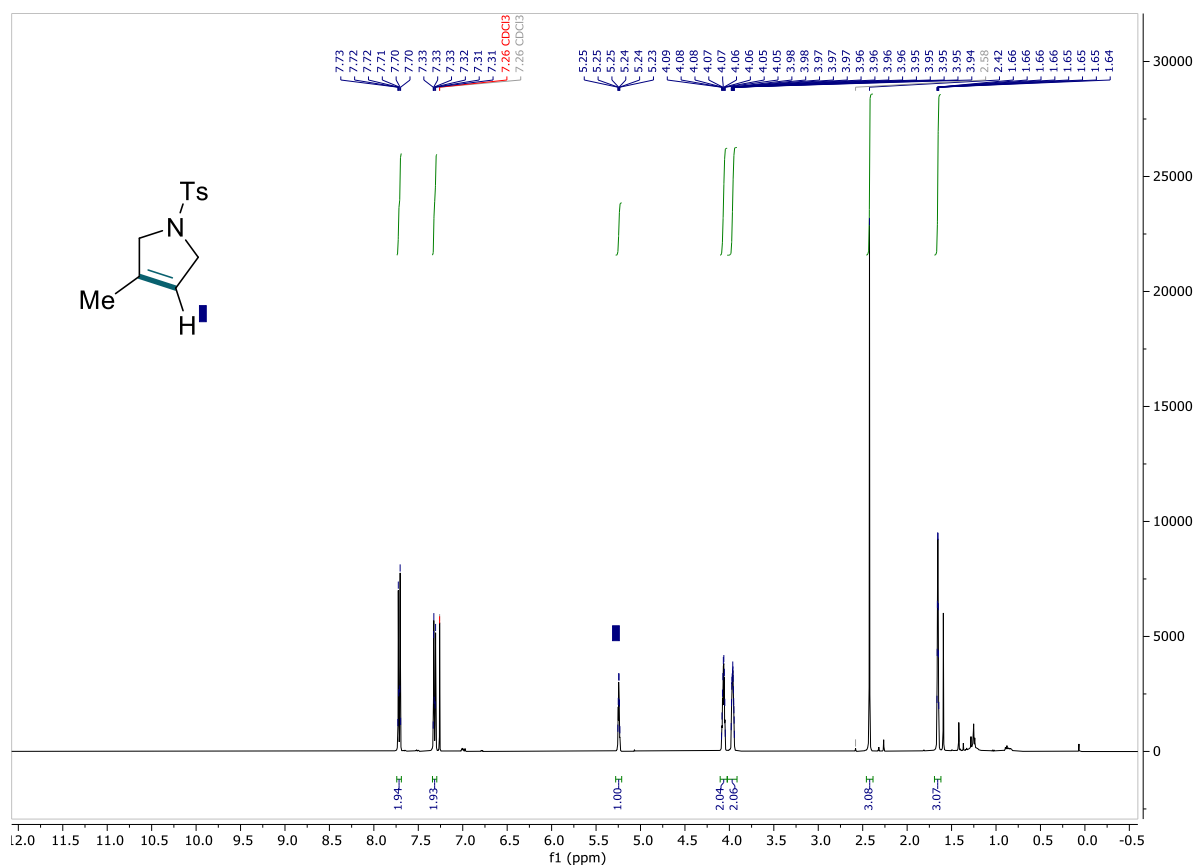

### <sup>1</sup>H NMR (400 MHz, CDCl<sub>3</sub>) (2h)

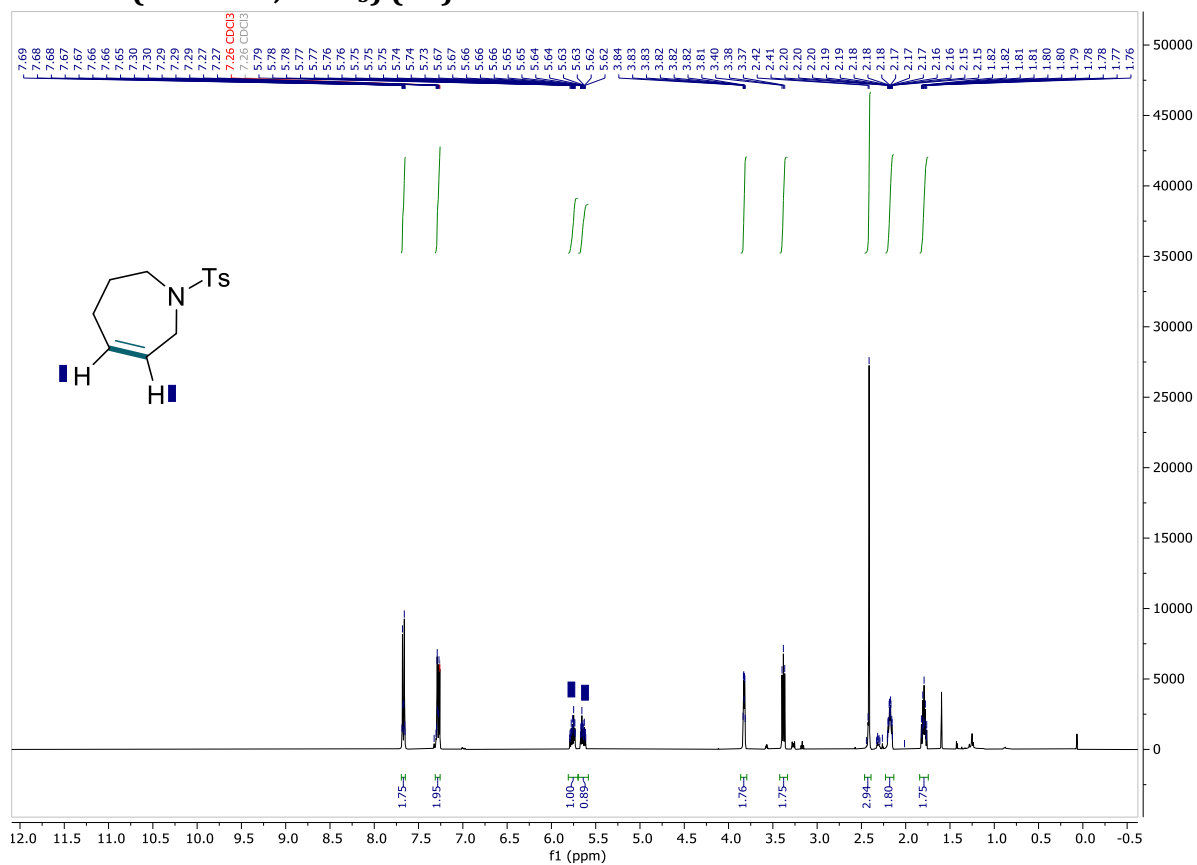

**<sup>1</sup>H NMR (400 MHz, CDCl<sub>3</sub>) (2i)**

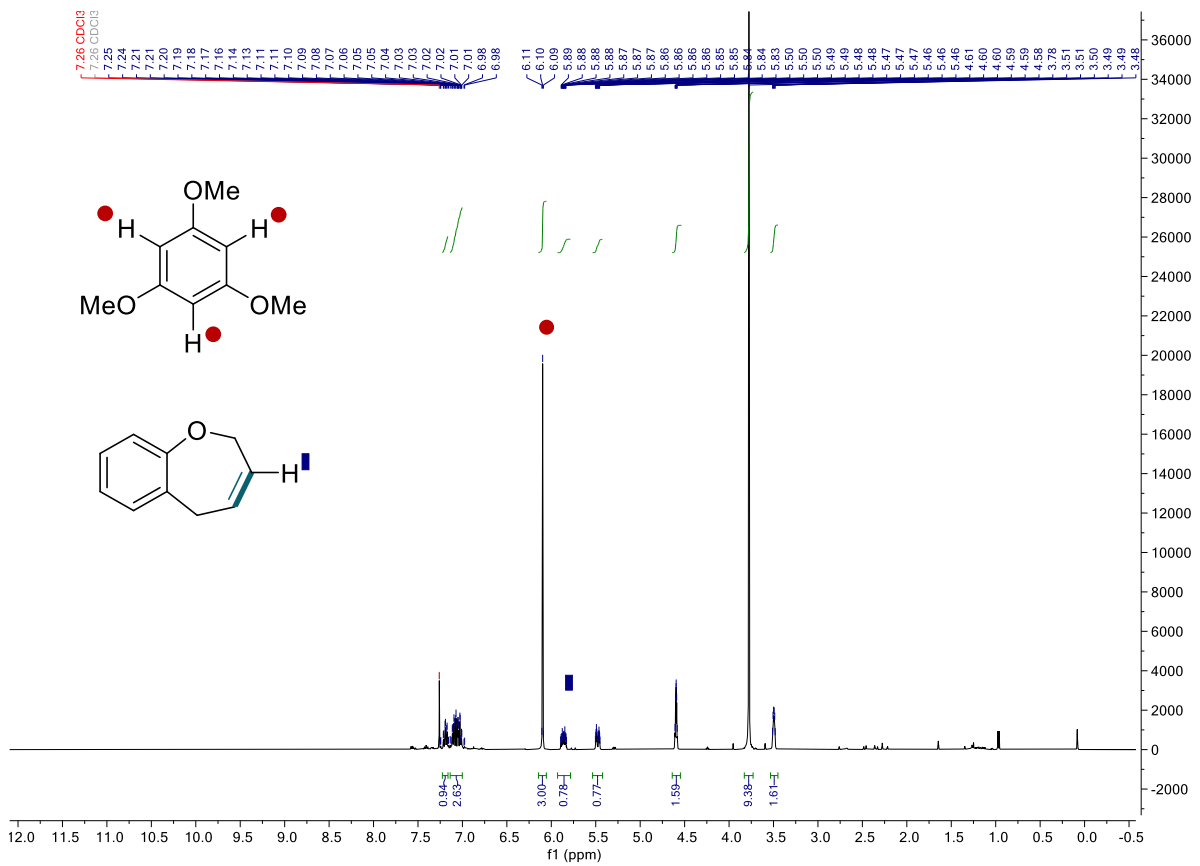

**<sup>1</sup>H NMR (400 MHz, CDCl<sub>3</sub>) (2j)**

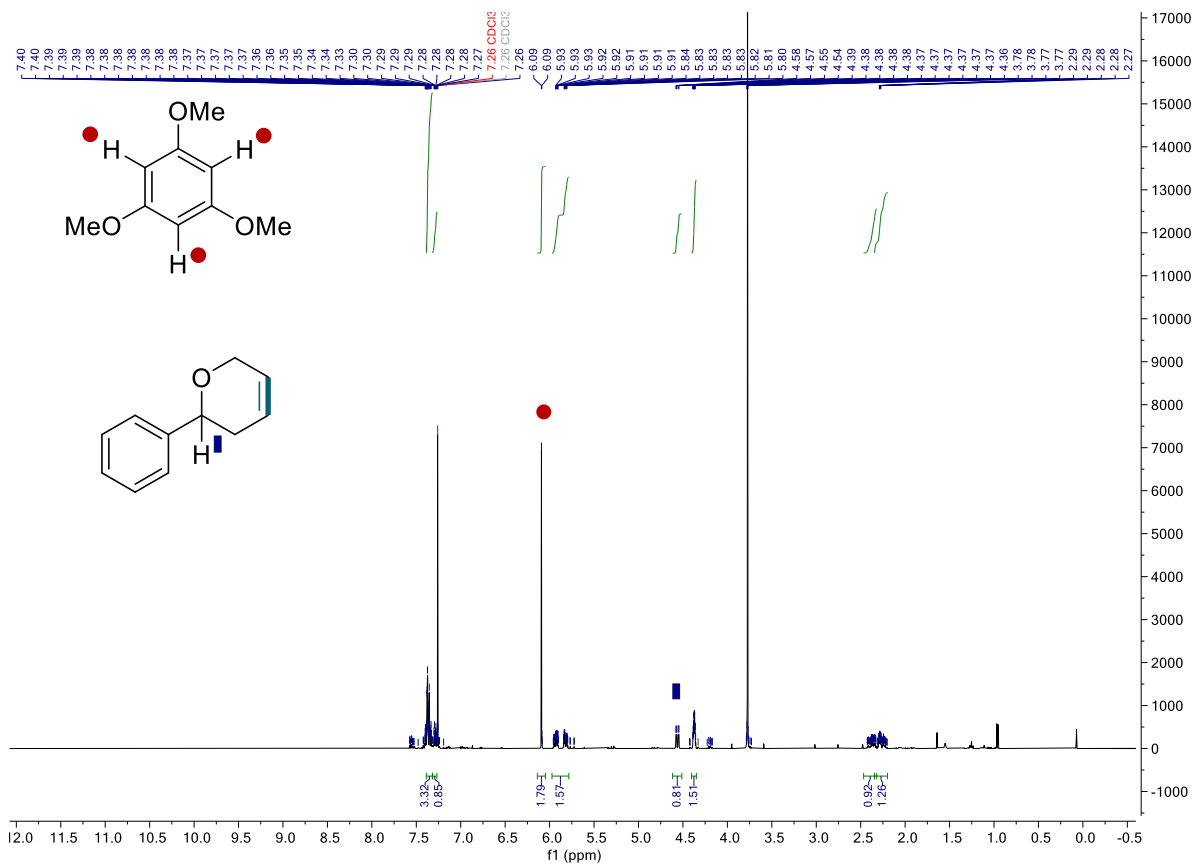

### $^1\text{H}$ NMR (400 MHz, $\text{CDCl}_3$ ) (2k)

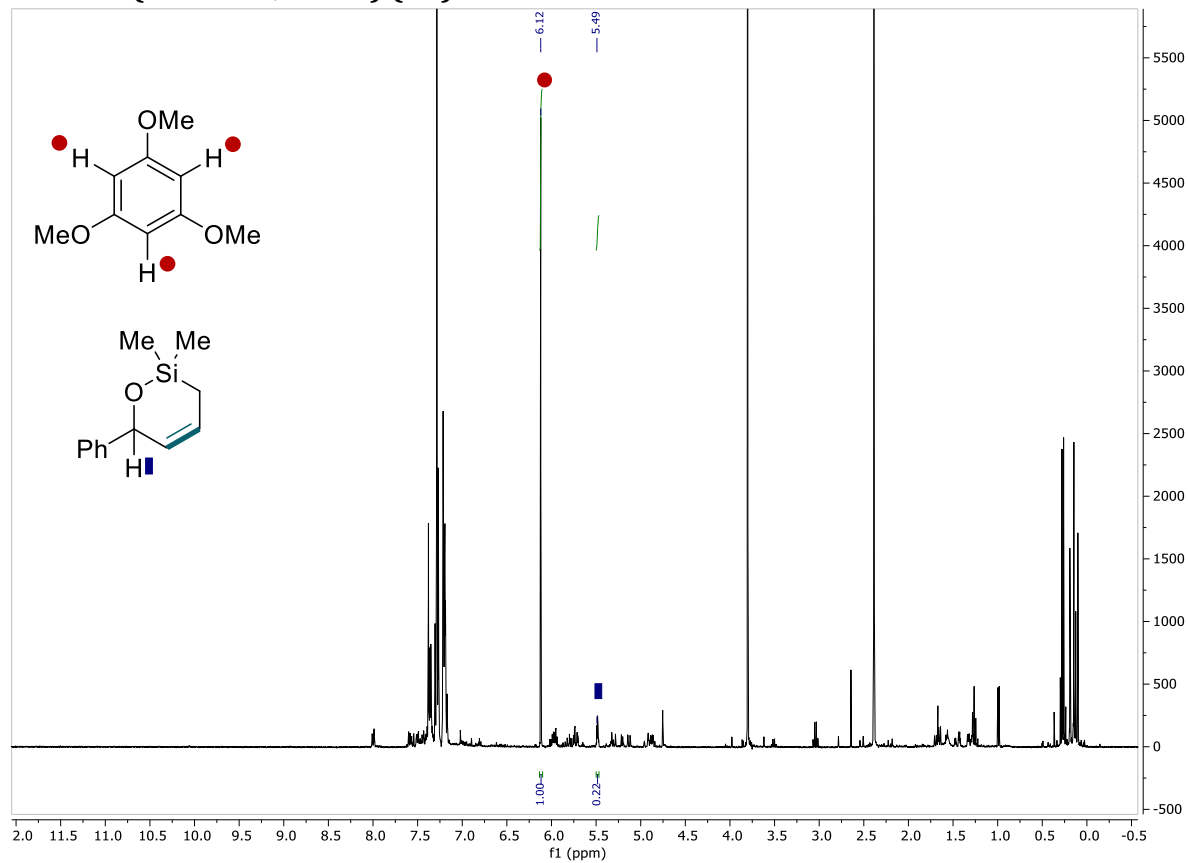

### $^1\text{H}$ NMR (400 MHz, $\text{CDCl}_3$ ) (2l)

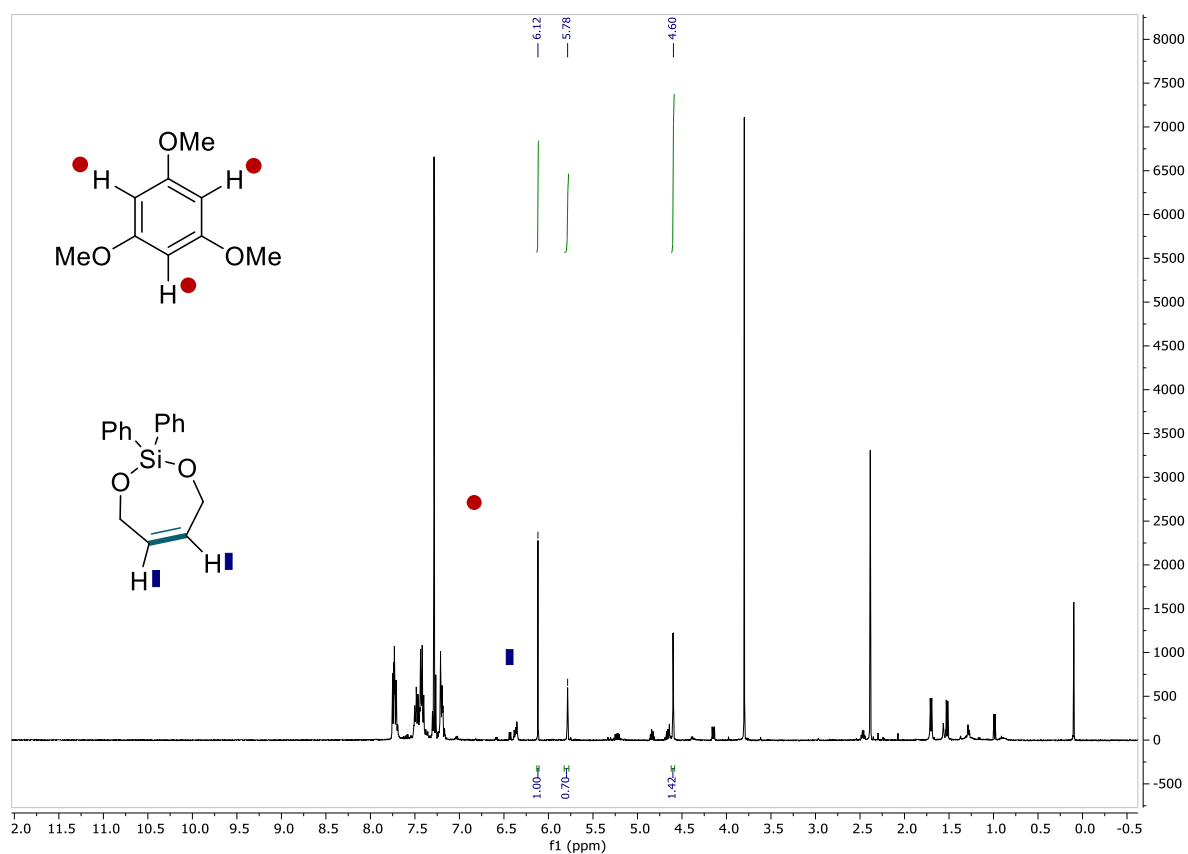



### <sup>1</sup>H NMR (400 MHz, CDCl<sub>3</sub>) (2m)

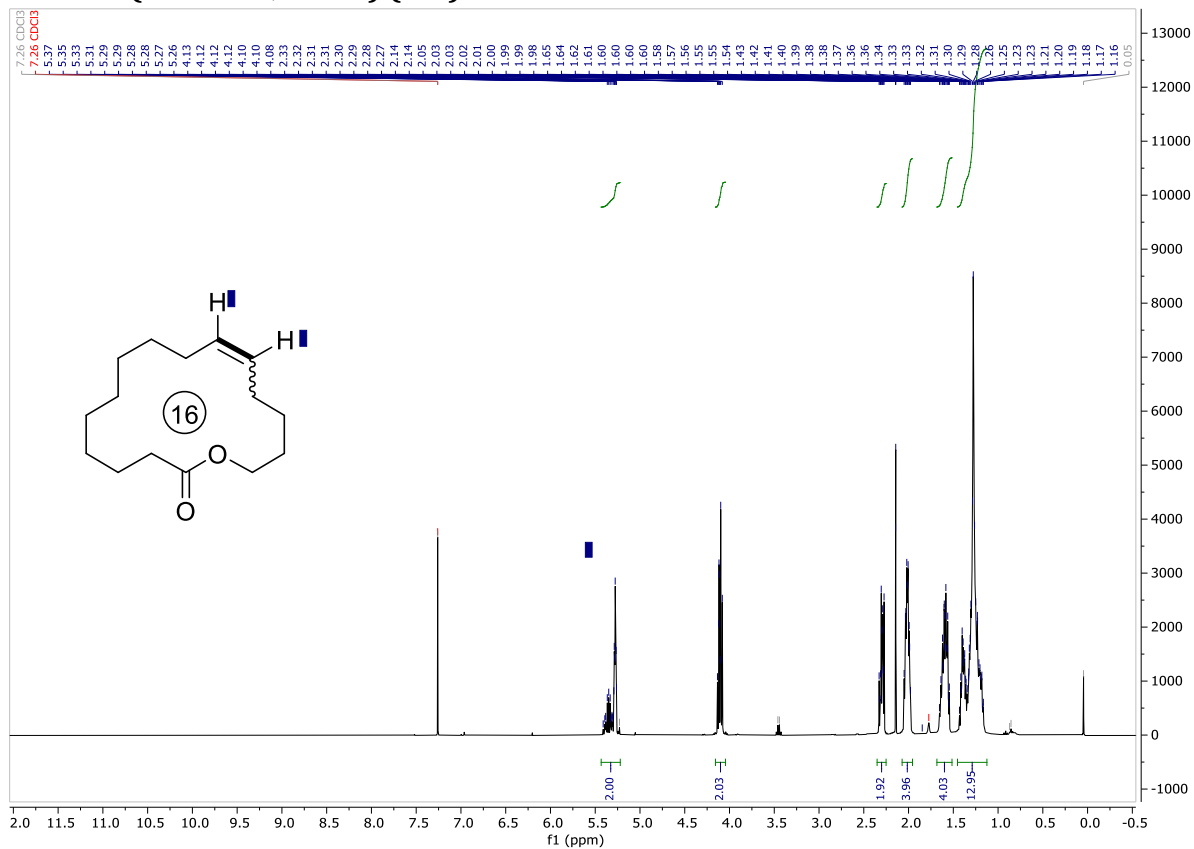

### <sup>1</sup>H NMR (400 MHz, CDCl<sub>3</sub>) (4a)

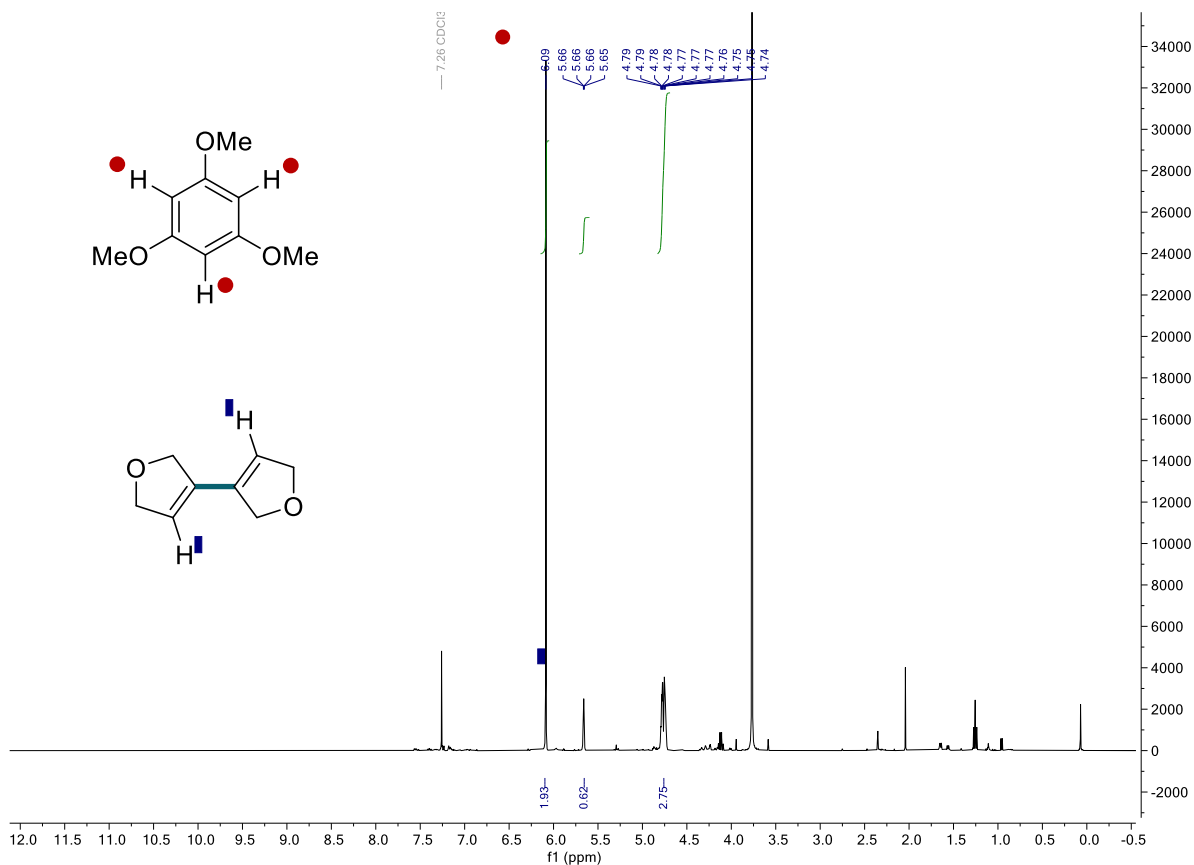

### <sup>1</sup>H NMR (400 MHz, CDCl<sub>3</sub>) (4b)

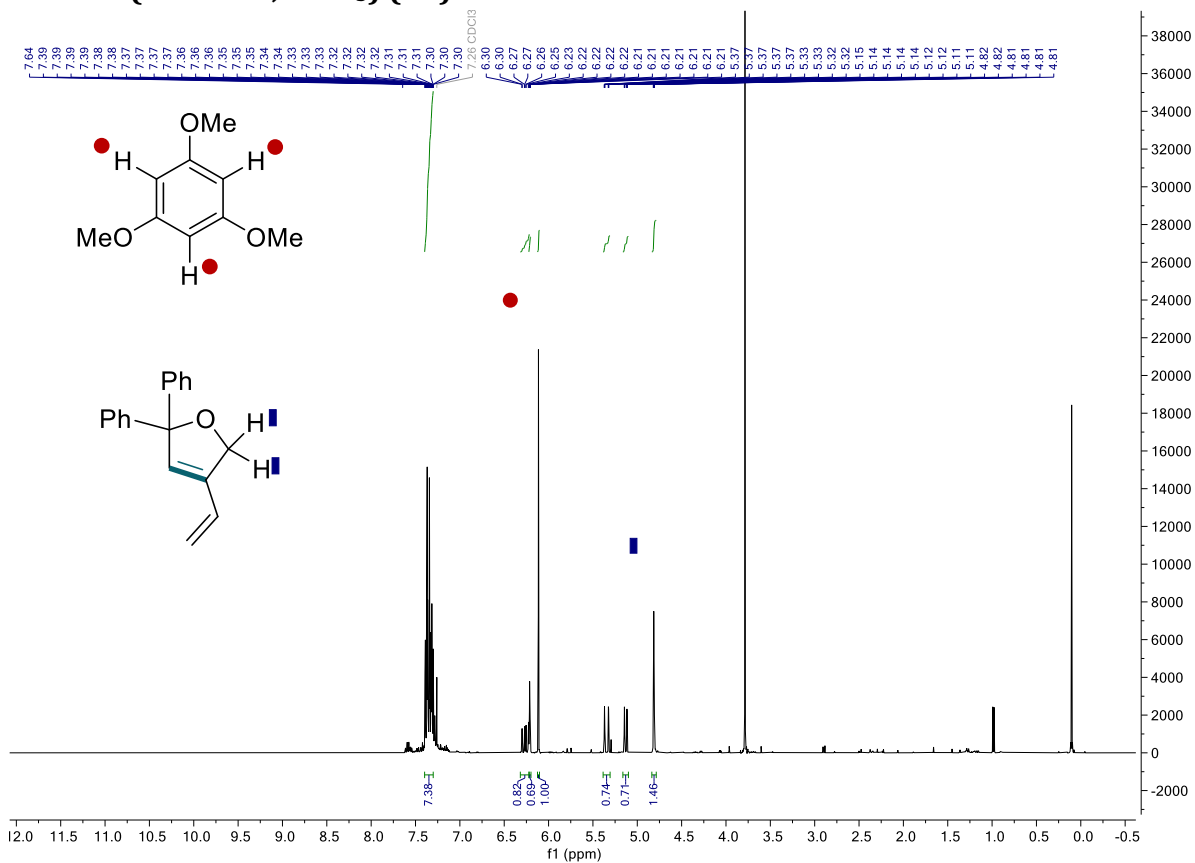

### <sup>1</sup>H NMR (400 MHz, CDCl<sub>3</sub>) (4c)

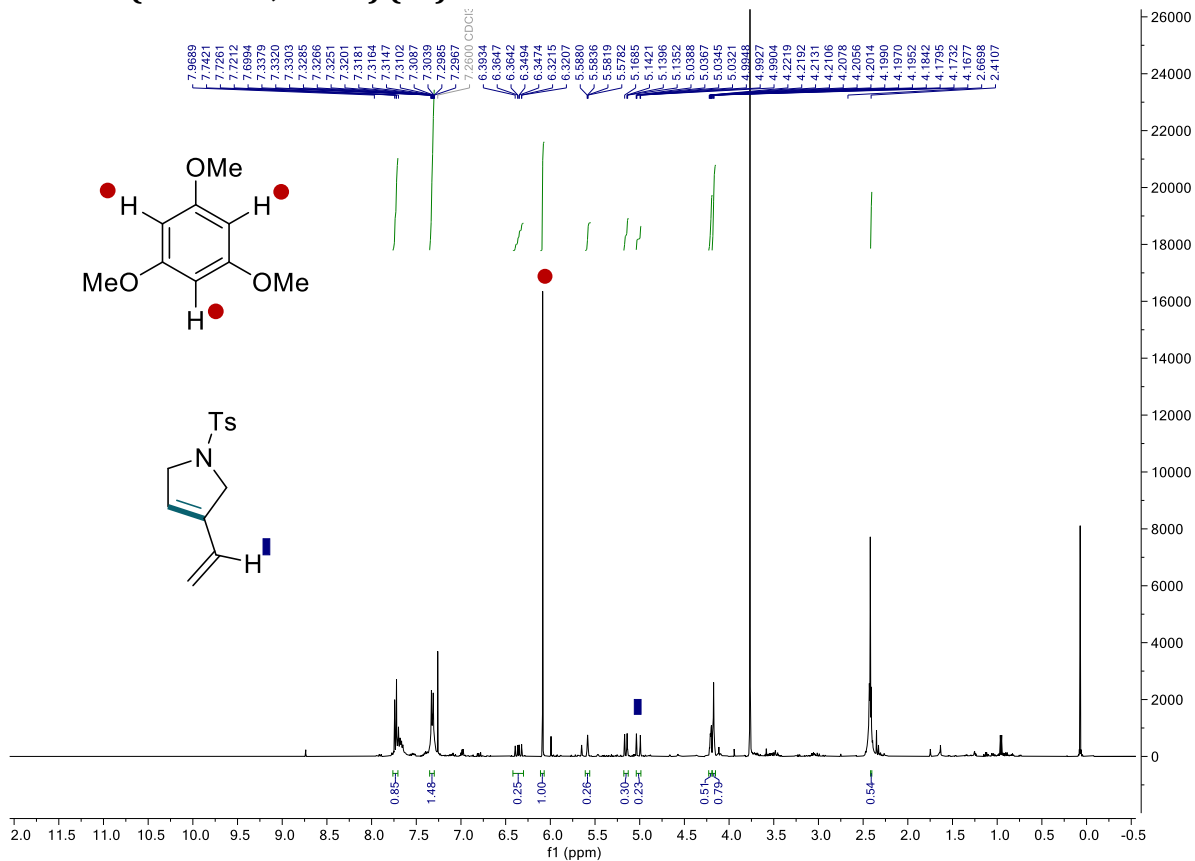

### $^1\text{H NMR}$ (400 MHz, $\text{CDCl}_3$ ) (6a)

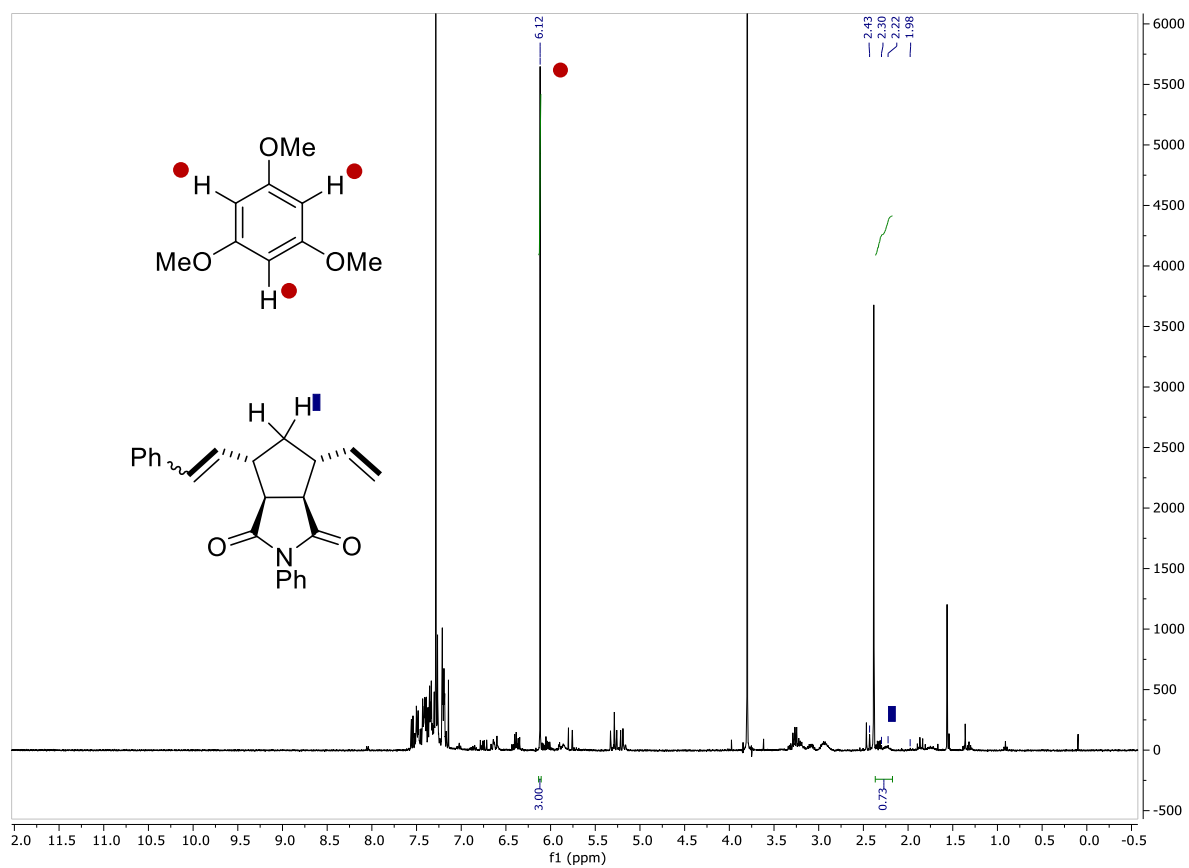

### $^1\text{H NMR}$ (400 MHz, $\text{CDCl}_3$ ) (6b)

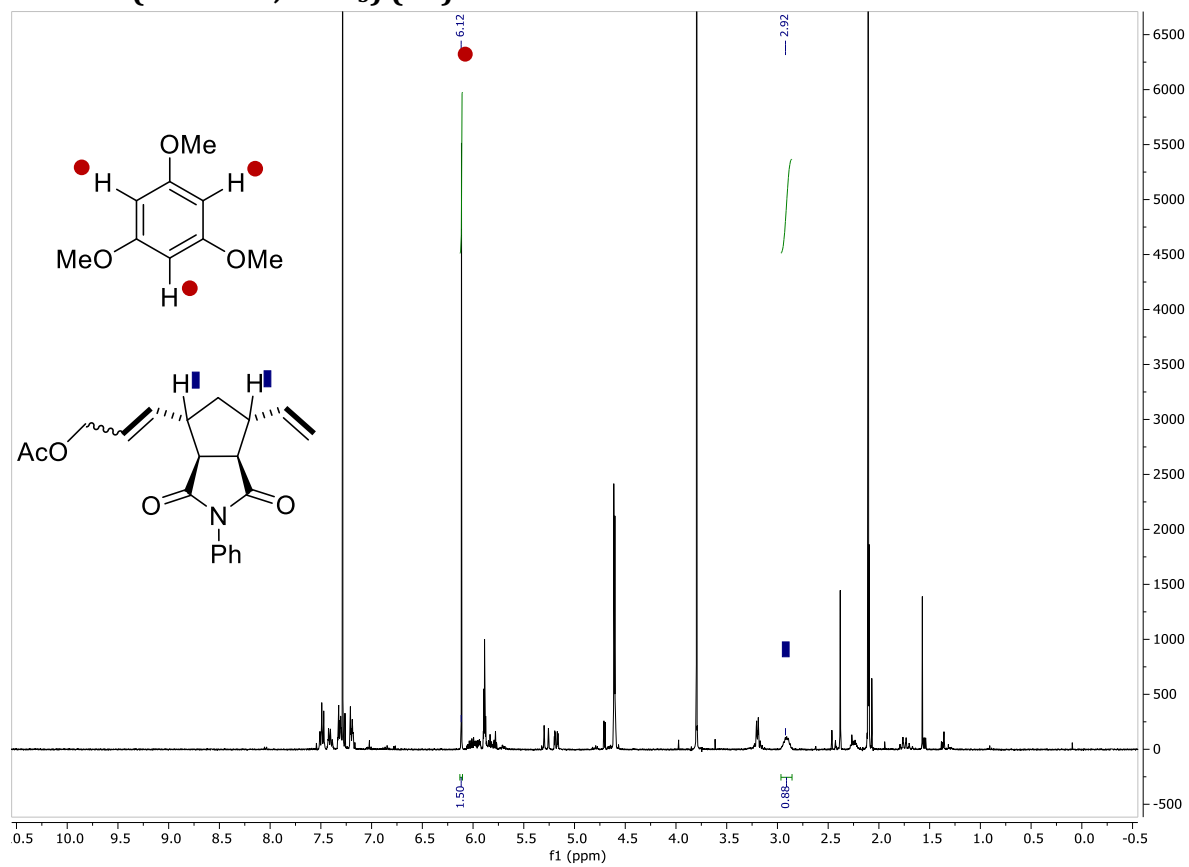

### $^1\text{H NMR}$ (400 MHz, $\text{CDCl}_3$ ) (6c)

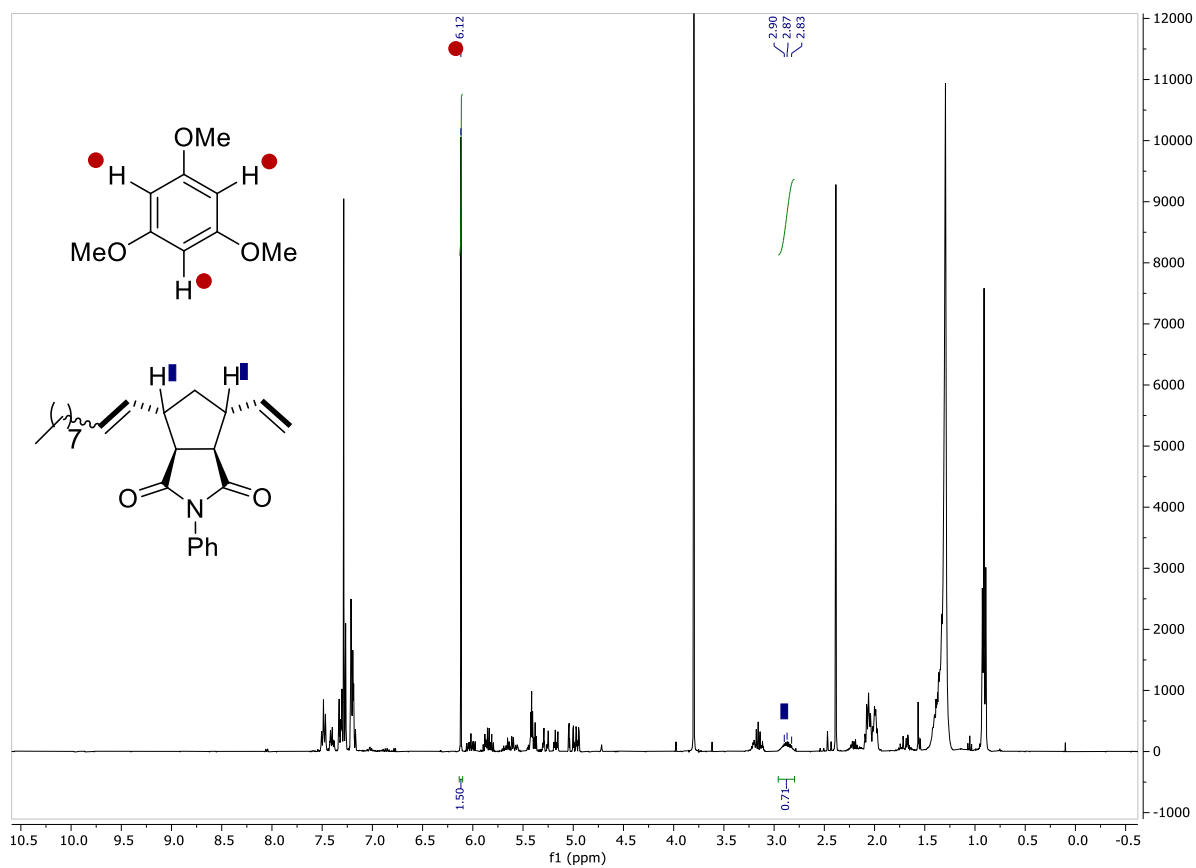

### $^1\text{H NMR}$ (400 MHz, $\text{CDCl}_3$ ) (9)

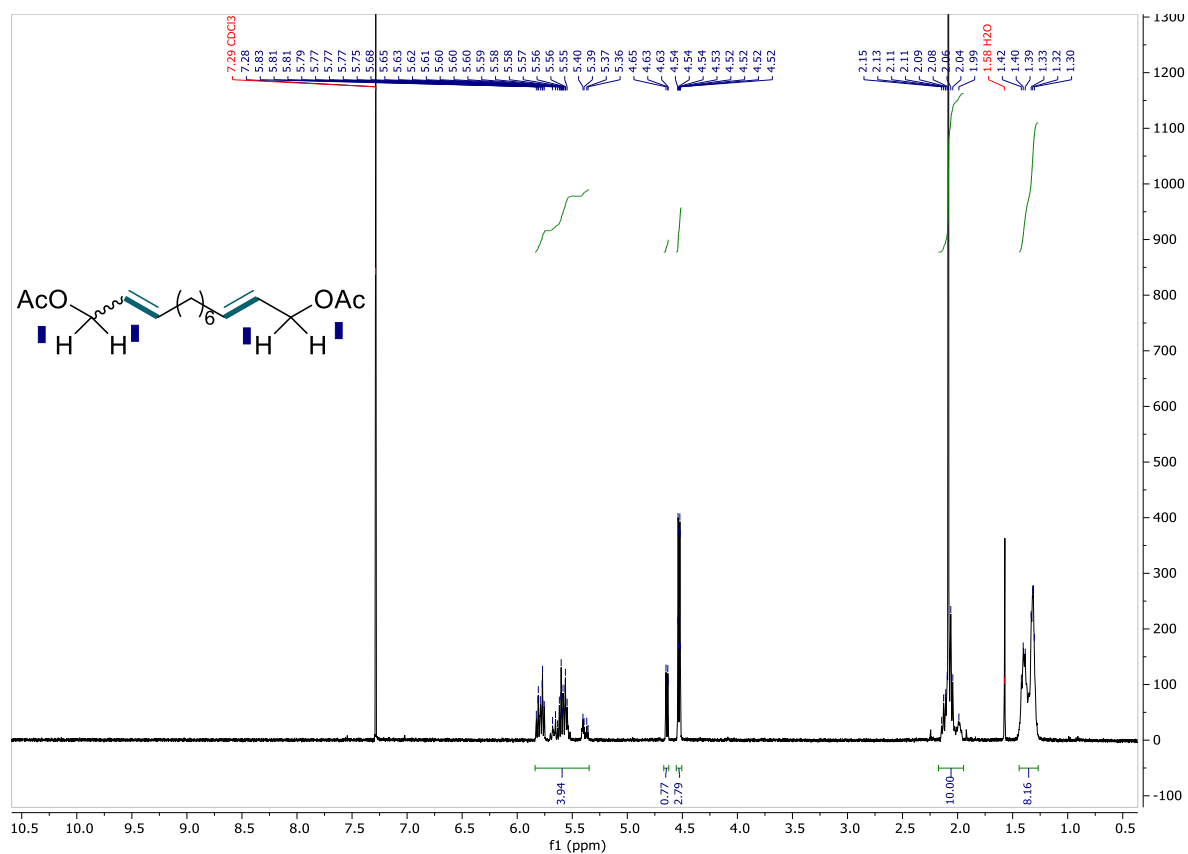

### $^1\text{H NMR}$ (400 MHz, $\text{CDCl}_3$ ) (11a) from allyl acetate 10

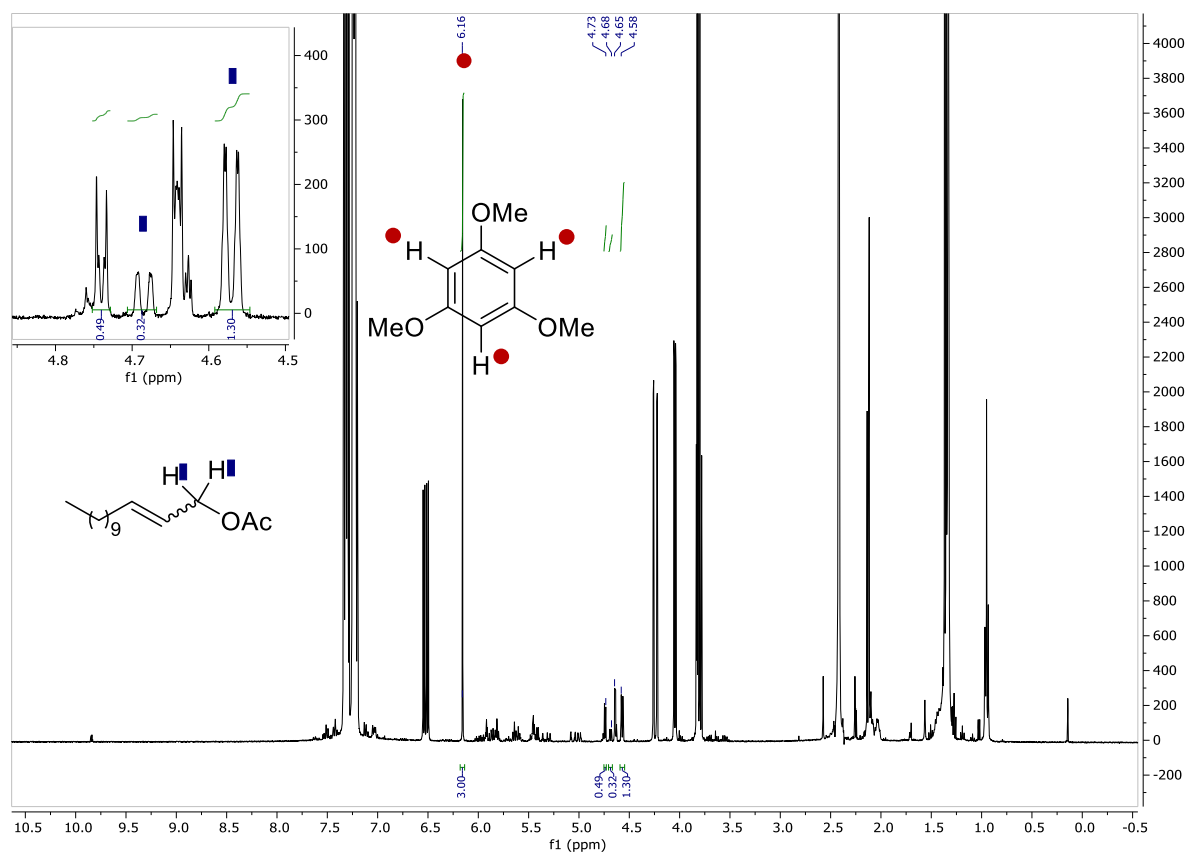

### $^1\text{H NMR}$ (400 MHz, $\text{CDCl}_3$ ) (11a) from diacetoxybutene 8

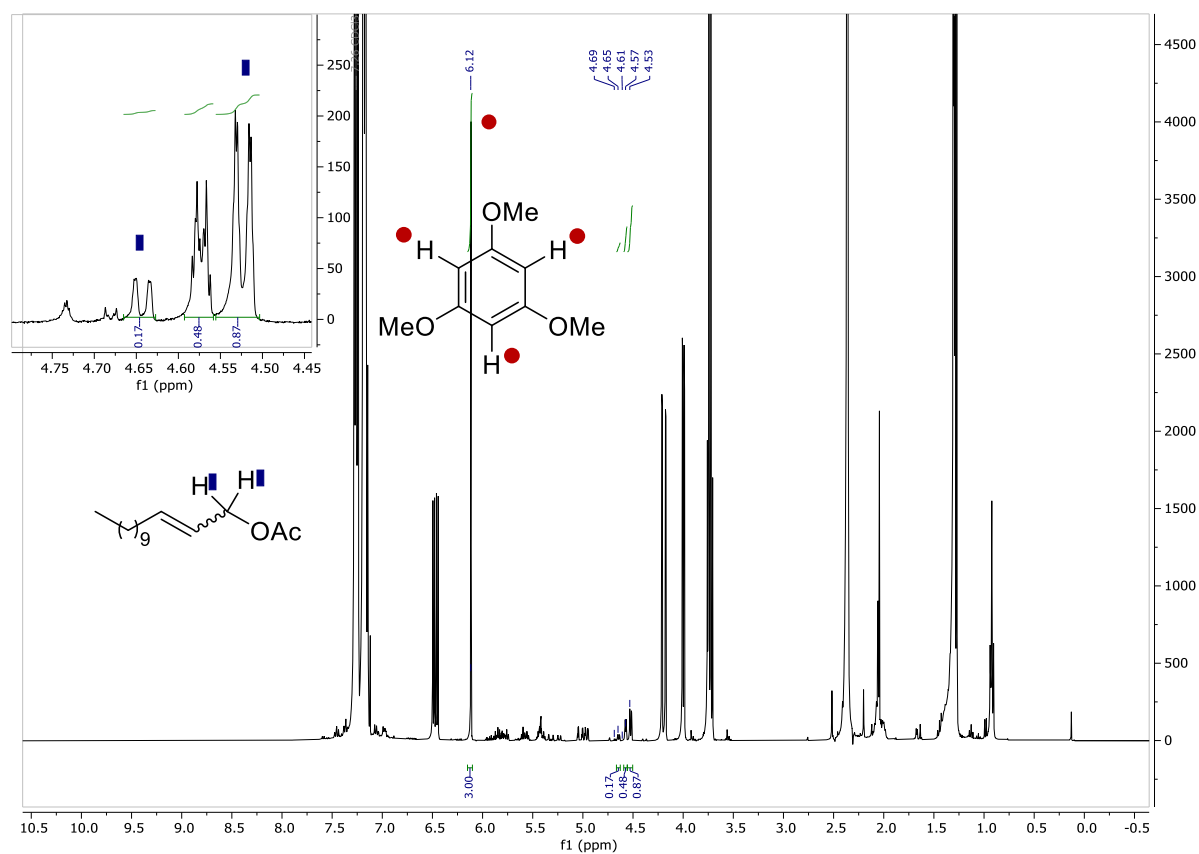

# <sup>1</sup>H NMR (400 MHz, CDCl<sub>3</sub>) (11b)

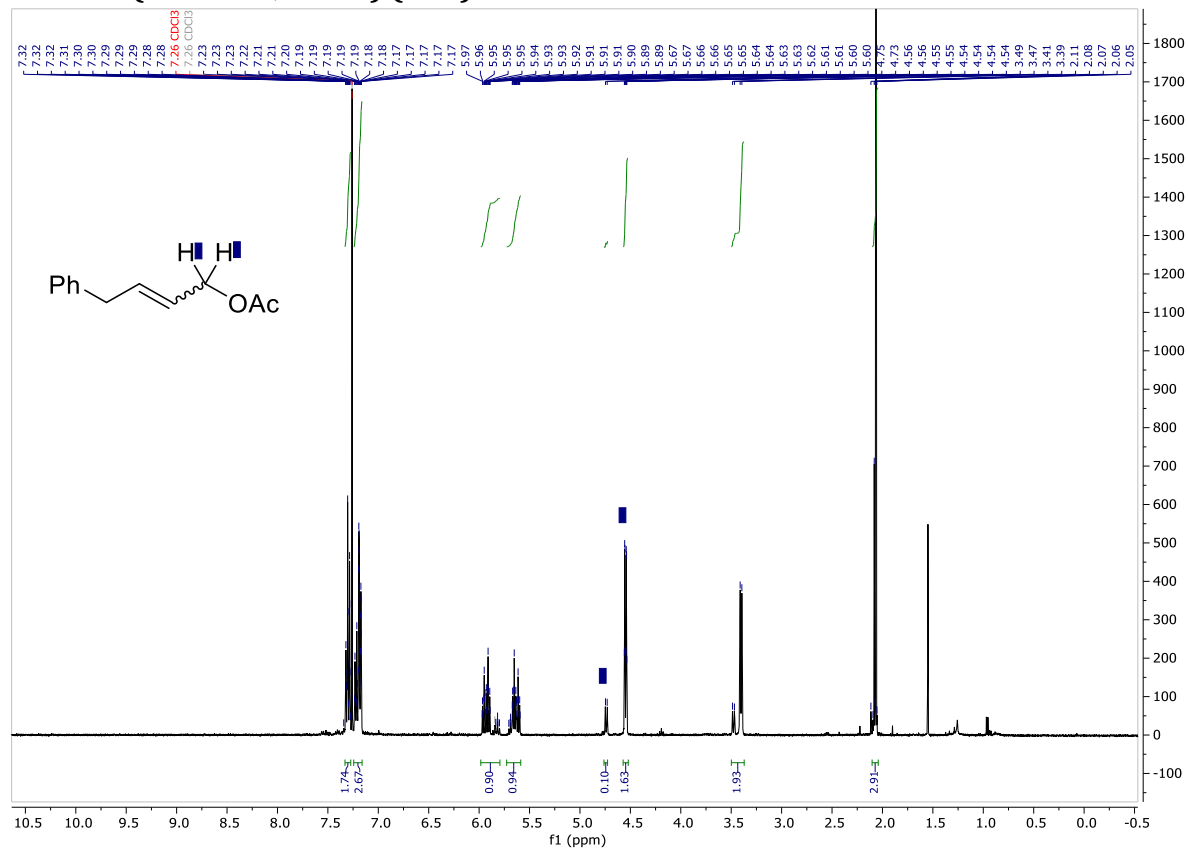

## 2.7.16 Highlighting weak hydrogen bond interactions by $^1\text{H}$ NMR in Ru-4b

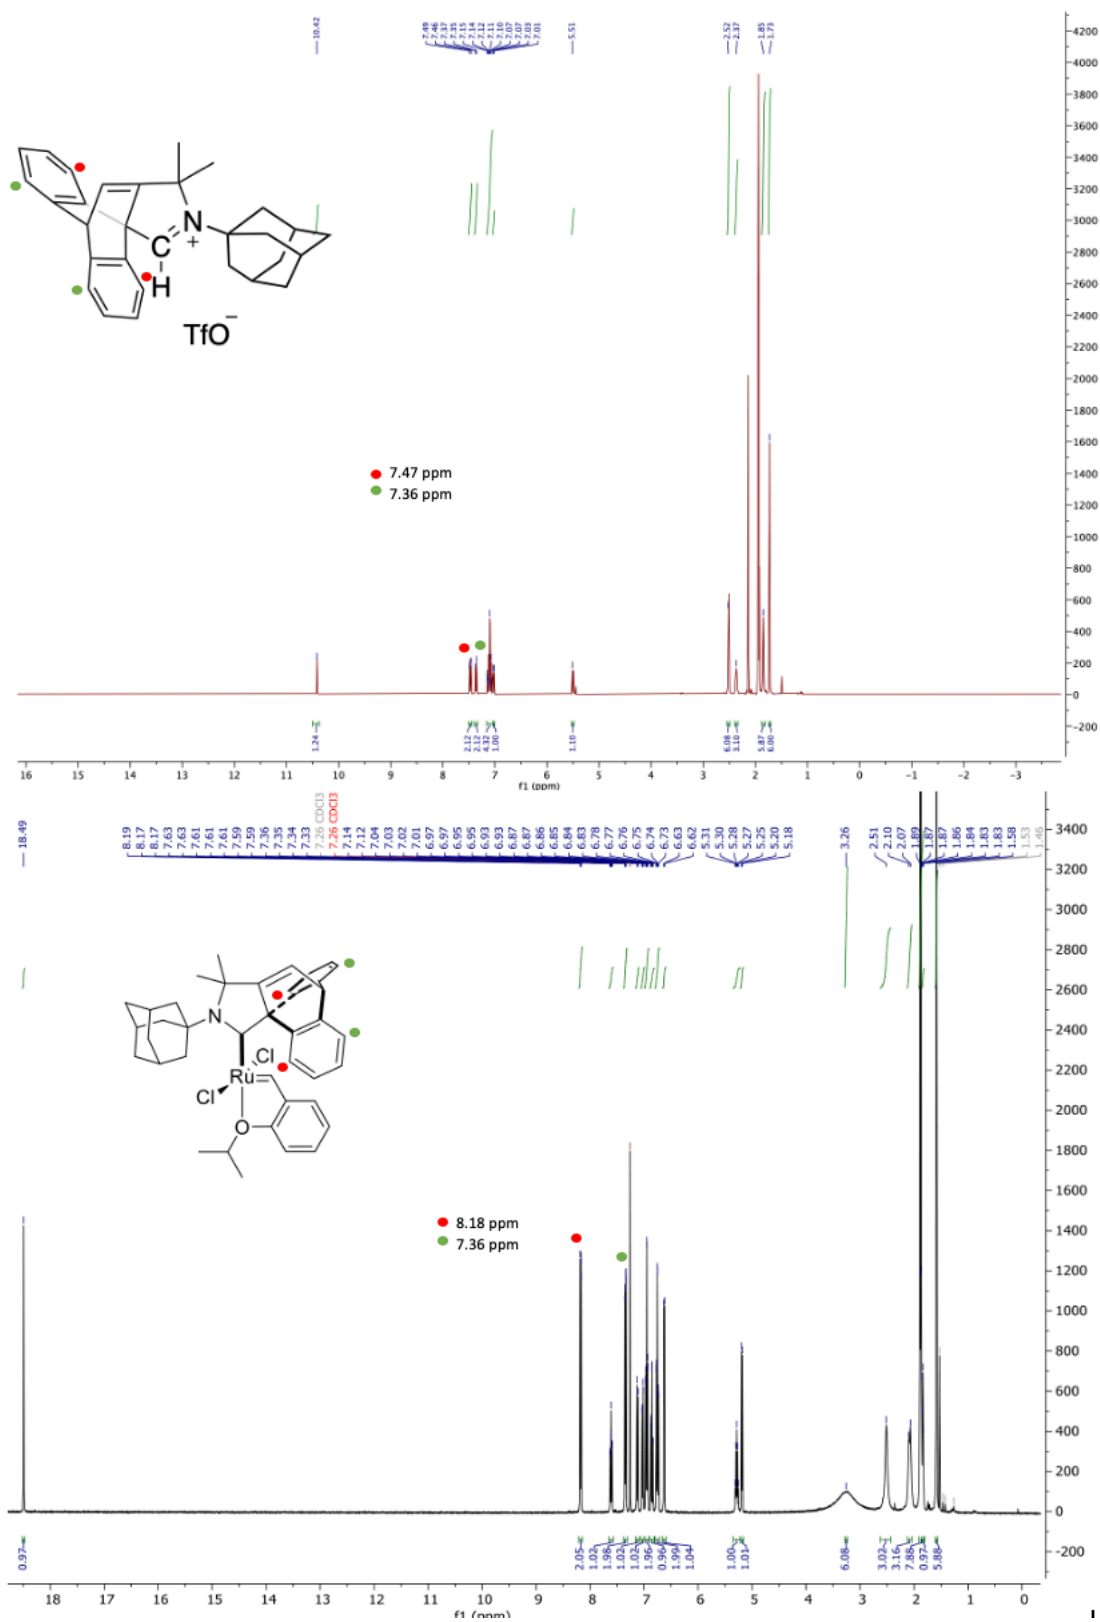

### 3 Computational details

All calculations were performed using Gaussian 16, Revision C.01.<sup>15</sup> All structures were calculated without constraints using B3LYP and LACVP\*\* basis set.<sup>16</sup> This method was chosen based for its accuracy for describing non-covalent interactions and outstanding performance for predicting structural parameters of related systems. The optimized geometric parameters were verified as true minima by the absence of negative eigenvalues in the harmonic vibrational frequency analysis. Energy reported for all molecules in this manuscript were the Gibbs free energies corrected with the zero-point energies. Geometry optimizations were benchmarked using B3LYP-d3 and several functionals comparing with X-ray structures. Based on these results, B3LYP-d3 and LACVP\*\* basis set showed the best accuracy and were selected to perform analyze all other compounds. Gibbs free energies reported in this manuscript were corrected with the zero-point energies obtained from frequency calculations.

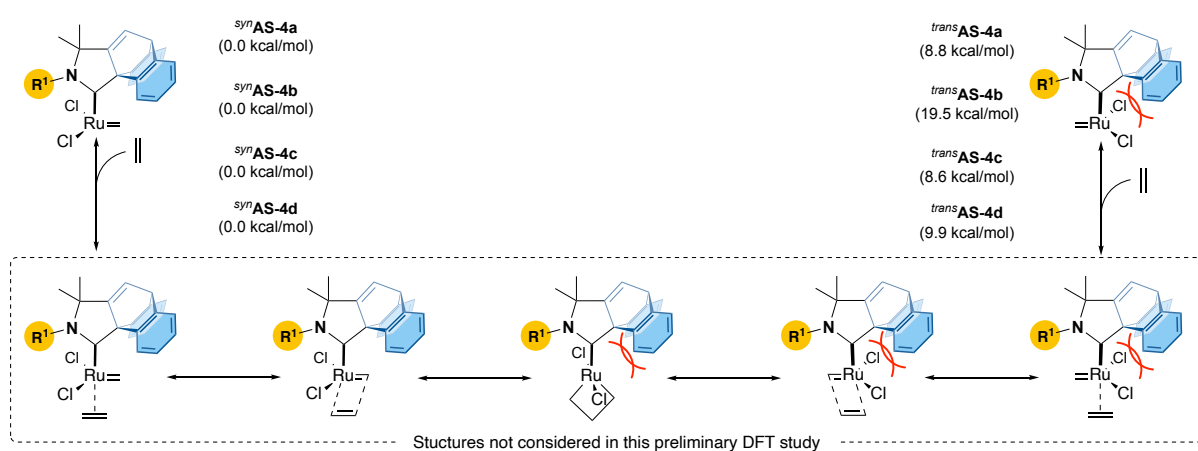

|           | R           | N-C1-Ru-C4 ° | C1-Ru-C4-H ° | G (Hartree)  | G (kCal)     | ΔG (kCal)     |
|-----------|-------------|--------------|--------------|--------------|--------------|---------------|
| SynAS-4a  | <i>i</i> Pr | 177.17       | 4.21         | -1107.641401 | -694657.3046 | 0             |
| AntiAS-4a | <i>i</i> Pr | 59.81        | 5.65         | -1107.627295 | -694648.4581 | 8.847         |
| SynAS-4b  | Ad          | 177.74       | 1.93         | -1379.02862  | -864857.799  | 0             |
| AntiAS-4b | Ad          | 56.16        | 3.1          | -1378.997547 | -864838.3116 | <b>19.487</b> |
| SynAS-4c  | Ph          | 179.98       | 0.09         | -1220.739806 | -765586.9693 | 0             |
| AntiAS-4c | Ph          | 45.94        | 3.62         | -1220.726062 | -765578.3498 | <b>8.62</b>   |
| SynAS-4d  | Mes         | 179.95       | 0.08         | -1338.589978 | -839496.7047 | 0             |
| AntiAS-4d | Mes         | 45.07        | 3.23         | -1338.574117 | -839486.7575 | <b>9.947</b>  |



### 3.1 SynAS-4a

|    |           |          |           |
|----|-----------|----------|-----------|
| Ru | 9.939000  | 2.326000 | 12.710000 |
| Cl | 8.751000  | 0.779000 | 14.084000 |
| Cl | 11.983000 | 3.512000 | 12.404000 |
| N  | 8.790000  | 4.312000 | 14.397000 |
| C  | 8.768000  | 3.779000 | 13.172000 |
| C  | 7.103000  | 5.486000 | 13.325000 |
| C  | 9.465000  | 5.345000 | 10.594000 |
| H  | 10.274000 | 4.759000 | 11.011000 |
| C  | 6.481000  | 3.654000 | 11.854000 |
| C  | 6.263000  | 2.284000 | 11.949000 |
| H  | 6.993000  | 1.634000 | 12.416000 |
| C  | 8.186000  | 5.295000 | 11.138000 |
| C  | 6.153000  | 6.277000 | 12.832000 |
| H  | 5.607000  | 7.038000 | 13.378000 |
| C  | 9.340000  | 2.059000 | 11.026000 |
| H  | 8.589000  | 2.664000 | 10.513000 |
| C  | 7.697000  | 4.468000 | 12.347000 |
| C  | 5.490000  | 4.491000 | 11.307000 |
| C  | 7.163000  | 6.101000 | 10.611000 |
| C  | 7.403000  | 6.925000 | 9.519000  |
| H  | 6.604000  | 7.539000 | 9.114000  |
| C  | 5.065000  | 1.748000 | 11.454000 |
| H  | 4.893000  | 0.680000 | 11.529000 |
| C  | 9.859000  | 3.932000 | 15.361000 |
| H  | 10.319000 | 3.035000 | 14.920000 |
| C  | 7.671000  | 5.284000 | 14.702000 |
| C  | 4.311000  | 3.956000 | 10.809000 |
| H  | 3.555000  | 4.607000 | 10.380000 |
| C  | 5.845000  | 5.974000 | 11.361000 |
| H  | 5.061000  | 6.609000 | 10.945000 |
| C  | 6.596000  | 4.608000 | 15.578000 |
| H  | 6.927000  | 4.469000 | 16.608000 |
| H  | 6.323000  | 3.636000 | 15.156000 |
| H  | 5.706000  | 5.244000 | 15.583000 |
| C  | 9.706000  | 6.183000 | 9.497000  |
| H  | 10.703000 | 6.222000 | 9.072000  |
| C  | 8.161000  | 6.591000 | 15.322000 |
| H  | 8.944000  | 7.045000 | 14.711000 |
| H  | 8.532000  | 6.444000 | 16.340000 |
| H  | 7.317000  | 7.287000 | 15.371000 |
| C  | 4.101000  | 2.572000 | 10.879000 |
| H  | 3.179000  | 2.147000 | 10.496000 |
| C  | 8.685000  | 6.961000 | 8.957000  |
| H  | 8.882000  | 7.604000 | 8.105000  |
| C  | 9.340000  | 3.498000 | 16.726000 |
| H  | 8.580000  | 2.720000 | 16.625000 |
| H  | 8.939000  | 4.337000 | 17.303000 |
| H  | 10.178000 | 3.082000 | 17.294000 |

|   |           |          |           |
|---|-----------|----------|-----------|
| C | 10.956000 | 4.995000 | 15.441000 |
| H | 10.637000 | 5.876000 | 16.001000 |
| H | 11.277000 | 5.288000 | 14.440000 |
| H | 11.822000 | 4.565000 | 15.955000 |
| H | 9.778000  | 1.224000 | 10.460000 |

### 3.2 AntiAS-4a

|    |           |          |           |
|----|-----------|----------|-----------|
| Ru | 10.125000 | 2.457000 | 13.378000 |
| Cl | 12.046000 | 3.628000 | 14.108000 |
| Cl | 9.095000  | 1.436000 | 11.481000 |
| N  | 7.392000  | 3.607000 | 13.449000 |
| C  | 8.718000  | 3.785000 | 13.461000 |
| C  | 7.643000  | 5.904000 | 13.151000 |
| C  | 9.891000  | 5.301000 | 15.851000 |
| H  | 9.892000  | 4.221000 | 15.931000 |
| C  | 9.889000  | 5.771000 | 12.216000 |
| C  | 10.559000 | 5.020000 | 11.260000 |
| H  | 10.501000 | 3.935000 | 11.245000 |
| C  | 9.536000  | 5.922000 | 14.662000 |
| C  | 7.632000  | 7.233000 | 13.062000 |
| H  | 6.761000  | 7.859000 | 12.907000 |
| C  | 9.694000  | 1.508000 | 14.859000 |
| H  | 8.920000  | 1.753000 | 15.590000 |
| C  | 9.013000  | 5.266000 | 13.366000 |
| C  | 9.907000  | 7.175000 | 12.156000 |
| C  | 9.551000  | 7.322000 | 14.560000 |
| C  | 9.965000  | 8.102000 | 15.632000 |
| H  | 9.985000  | 9.184000 | 15.545000 |
| C  | 11.296000 | 5.677000 | 10.267000 |
| H  | 11.826000 | 5.093000 | 9.523000  |
| C  | 6.756000  | 2.300000 | 13.766000 |
| H  | 7.580000  | 1.588000 | 13.688000 |
| C  | 6.589000  | 4.840000 | 13.057000 |
| C  | 10.643000 | 7.826000 | 11.176000 |
| H  | 10.663000 | 8.911000 | 11.138000 |
| C  | 9.036000  | 7.836000 | 13.220000 |
| H  | 9.046000  | 8.925000 | 13.154000 |
| C  | 6.134000  | 4.724000 | 11.588000 |
| H  | 5.312000  | 4.019000 | 11.459000 |
| H  | 6.972000  | 4.415000 | 10.957000 |
| H  | 5.798000  | 5.712000 | 11.257000 |
| C  | 10.296000 | 6.088000 | 16.937000 |
| H  | 10.588000 | 5.607000 | 17.864000 |
| C  | 5.416000  | 5.120000 | 13.994000 |
| H  | 5.751000  | 5.181000 | 15.033000 |
| H  | 4.630000  | 4.366000 | 13.906000 |
| H  | 4.983000  | 6.087000 | 13.720000 |
| C  | 11.348000 | 7.069000 | 10.231000 |

|   |           |          |           |
|---|-----------|----------|-----------|
| H | 11.926000 | 7.570000 | 9.461000  |
| C | 10.342000 | 7.477000 | 16.828000 |
| H | 10.665000 | 8.078000 | 17.671000 |
| C | 5.702000  | 1.837000 | 12.767000 |
| H | 6.108000  | 1.834000 | 11.753000 |
| H | 4.787000  | 2.436000 | 12.801000 |
| H | 5.428000  | 0.808000 | 13.021000 |
| C | 6.239000  | 2.277000 | 15.210000 |
| H | 5.279000  | 2.786000 | 15.319000 |
| H | 6.953000  | 2.749000 | 15.893000 |
| H | 6.101000  | 1.236000 | 15.521000 |
| H | 10.301000 | 0.618000 | 15.073000 |

### 3.3 SynAS-4b

|    |           |          |           |
|----|-----------|----------|-----------|
| Ru | 6.967000  | 8.562000 | 4.586000  |
| Cl | 9.286000  | 8.744000 | 3.910000  |
| Cl | 4.625000  | 8.692000 | 4.037000  |
| C  | 7.017000  | 9.720000 | 5.985000  |
| H  | 7.060000  | 9.468000 | 7.046000  |
| C  | 6.960000  | 6.916000 | 5.593000  |
| N  | 6.968000  | 5.672000 | 5.070000  |
| C  | 7.239000  | 5.369000 | 3.612000  |
| C  | 6.751000  | 6.512000 | 2.703000  |
| H  | 7.301000  | 7.451000 | 2.902000  |
| H  | 5.679000  | 6.675000 | 2.836000  |
| C  | 7.083000  | 6.233000 | 1.221000  |
| H  | 6.731000  | 7.090000 | 0.633000  |
| C  | 8.605000  | 6.077000 | 1.067000  |
| H  | 9.111000  | 7.002000 | 1.371000  |
| H  | 8.856000  | 5.890000 | 0.014000  |
| C  | 9.081000  | 4.907000 | 1.941000  |
| H  | 10.167000 | 4.785000 | 1.836000  |
| C  | 8.366000  | 3.614000 | 1.511000  |
| H  | 8.707000  | 2.771000 | 2.128000  |
| H  | 8.613000  | 3.374000 | 0.468000  |
| C  | 6.846000  | 3.798000 | 1.657000  |
| H  | 6.332000  | 2.871000 | 1.371000  |
| C  | 6.496000  | 4.104000 | 3.127000  |
| H  | 6.765000  | 3.232000 | 3.726000  |
| H  | 5.415000  | 4.261000 | 3.222000  |
| C  | 8.764000  | 5.196000 | 3.420000  |
| H  | 9.264000  | 6.115000 | 3.747000  |
| H  | 9.133000  | 4.372000 | 4.037000  |
| C  | 6.373000  | 4.953000 | 0.767000  |
| H  | 5.284000  | 5.073000 | 0.845000  |
| H  | 6.607000  | 4.746000 | -0.285000 |
| C  | 6.784000  | 4.552000 | 6.096000  |
| C  | 7.895000  | 3.494000 | 6.085000  |

|   |           |           |           |
|---|-----------|-----------|-----------|
| H | 8.872000  | 3.965000  | 6.219000  |
| H | 7.909000  | 2.881000  | 5.183000  |
| H | 7.725000  | 2.828000  | 6.938000  |
| C | 5.375000  | 3.931000  | 5.999000  |
| H | 5.188000  | 3.372000  | 6.920000  |
| H | 5.261000  | 3.249000  | 5.157000  |
| H | 4.624000  | 4.723000  | 5.924000  |
| C | 6.867000  | 5.319000  | 7.381000  |
| C | 6.882000  | 4.937000  | 8.657000  |
| H | 6.839000  | 3.916000  | 9.019000  |
| C | 6.968000  | 6.123000  | 9.619000  |
| H | 6.980000  | 5.828000  | 10.670000 |
| C | 8.210000  | 6.901000  | 9.213000  |
| C | 9.276000  | 7.216000  | 10.046000 |
| H | 9.250000  | 6.930000  | 11.093000 |
| C | 10.384000 | 7.891000  | 9.518000  |
| H | 11.223000 | 8.138000  | 10.161000 |
| C | 10.412000 | 8.229000  | 8.168000  |
| H | 11.276000 | 8.736000  | 7.750000  |
| C | 9.333000  | 7.921000  | 7.327000  |
| H | 9.382000  | 8.184000  | 6.279000  |
| C | 8.222000  | 7.275000  | 7.858000  |
| C | 5.793000  | 7.027000  | 9.276000  |
| C | 4.815000  | 7.447000  | 10.167000 |
| H | 4.871000  | 7.156000  | 11.212000 |
| C | 3.754000  | 8.234000  | 9.703000  |
| H | 2.983000  | 8.563000  | 10.392000 |
| C | 3.684000  | 8.577000  | 8.355000  |
| H | 2.853000  | 9.168000  | 7.985000  |
| C | 4.676000  | 8.162000  | 7.455000  |
| H | 4.590000  | 8.424000  | 6.409000  |
| C | 5.745000  | 7.404000  | 7.920000  |
| C | 6.935000  | 6.817000  | 7.121000  |
| H | 7.018000  | 10.796000 | 5.749000  |

### 3.4 AntiAS-4b

|    |          |           |          |
|----|----------|-----------|----------|
| Ru | 3.998000 | 6.754000  | 5.874000 |
| Cl | 3.887000 | 6.465000  | 3.512000 |
| Cl | 2.906000 | 6.060000  | 7.894000 |
| C  | 4.151000 | 8.558000  | 5.841000 |
| H  | 5.050000 | 9.150000  | 6.011000 |
| C  | 5.790000 | 6.177000  | 6.411000 |
| N  | 6.657000 | 6.388000  | 7.424000 |
| C  | 6.690000 | 7.596000  | 8.355000 |
| C  | 7.384000 | 8.739000  | 7.577000 |
| H  | 6.841000 | 8.918000  | 6.643000 |
| H  | 8.398000 | 8.438000  | 7.295000 |
| C  | 7.443000 | 10.016000 | 8.431000 |

|   |          |           |           |
|---|----------|-----------|-----------|
| H | 7.926000 | 10.810000 | 7.846000  |
| C | 6.021000 | 10.447000 | 8.824000  |
| H | 5.425000 | 10.653000 | 7.924000  |
| H | 6.057000 | 11.377000 | 9.407000  |
| C | 5.360000 | 9.331000  | 9.651000  |
| H | 4.334000 | 9.619000  | 9.909000  |
| C | 6.174000 | 9.087000  | 10.927000 |
| H | 5.686000 | 8.322000  | 11.545000 |
| H | 6.238000 | 10.005000 | 11.527000 |
| C | 7.574000 | 8.623000  | 10.511000 |
| H | 8.173000 | 8.392000  | 11.403000 |
| C | 7.469000 | 7.333000  | 9.670000  |
| H | 6.940000 | 6.569000  | 10.251000 |
| H | 8.481000 | 6.976000  | 9.487000  |
| C | 5.290000 | 8.037000  | 8.820000  |
| H | 4.631000 | 8.209000  | 7.975000  |
| H | 4.834000 | 7.229000  | 9.399000  |
| C | 8.266000 | 9.729000  | 9.698000  |
| H | 9.285000 | 9.420000  | 9.423000  |
| H | 8.355000 | 10.638000 | 10.306000 |
| C | 7.802000 | 5.346000  | 7.490000  |
| C | 7.709000 | 4.466000  | 8.749000  |
| H | 6.665000 | 4.215000  | 8.954000  |
| H | 8.152000 | 4.918000  | 9.634000  |
| H | 8.245000 | 3.533000  | 8.542000  |
| C | 9.197000 | 5.961000  | 7.272000  |
| H | 9.914000 | 5.135000  | 7.211000  |
| H | 9.525000 | 6.629000  | 8.067000  |
| H | 9.224000 | 6.494000  | 6.318000  |
| C | 7.518000 | 4.506000  | 6.282000  |
| C | 8.183000 | 3.515000  | 5.688000  |
| H | 9.074000 | 3.025000  | 6.065000  |
| C | 7.624000 | 3.196000  | 4.296000  |
| H | 8.169000 | 2.401000  | 3.783000  |
| C | 6.151000 | 2.872000  | 4.480000  |
| C | 5.514000 | 1.710000  | 4.064000  |
| H | 6.069000 | 0.948000  | 3.526000  |
| C | 4.157000 | 1.527000  | 4.358000  |
| H | 3.651000 | 0.624000  | 4.035000  |
| C | 3.465000 | 2.496000  | 5.080000  |
| H | 2.420000 | 2.348000  | 5.331000  |
| C | 4.110000 | 3.667000  | 5.497000  |
| H | 3.552000 | 4.366000  | 6.115000  |
| C | 5.443000 | 3.870000  | 5.169000  |
| C | 7.670000 | 4.524000  | 3.543000  |
| C | 8.350000 | 4.772000  | 2.358000  |
| H | 8.864000 | 3.965000  | 1.845000  |
| C | 8.381000 | 6.076000  | 1.846000  |
| H | 8.913000 | 6.280000  | 0.923000  |
| C | 7.739000 | 7.110000  | 2.523000  |

|   |          |          |          |
|---|----------|----------|----------|
| H | 7.767000 | 8.119000 | 2.126000 |
| C | 7.036000 | 6.857000 | 3.708000 |
| H | 6.504000 | 7.656000 | 4.210000 |
| C | 6.989000 | 5.560000 | 4.202000 |
| C | 6.337000 | 5.066000 | 5.520000 |
| H | 3.250000 | 9.124000 | 5.562000 |

### 3.5 SynAS-4c

|    |           |          |           |
|----|-----------|----------|-----------|
| Ru | 7.188000  | 8.199000 | 13.600000 |
| Cl | 9.266000  | 7.167000 | 14.156000 |
| Cl | 5.951000  | 9.629000 | 12.144000 |
| C  | 6.500000  | 8.600000 | 15.223000 |
| H  | 5.745000  | 8.022000 | 15.759000 |
| C  | 6.168000  | 6.599000 | 13.325000 |
| N  | 6.322000  | 5.889000 | 12.203000 |
| C  | 7.234000  | 6.262000 | 11.155000 |
| C  | 6.792000  | 7.088000 | 10.117000 |
| H  | 5.785000  | 7.485000 | 10.144000 |
| C  | 7.673000  | 7.426000 | 9.091000  |
| H  | 7.338000  | 8.079000 | 8.292000  |
| C  | 8.983000  | 6.944000 | 9.103000  |
| H  | 9.667000  | 7.215000 | 8.306000  |
| C  | 9.420000  | 6.129000 | 10.149000 |
| H  | 10.444000 | 5.772000 | 10.174000 |
| C  | 8.548000  | 5.784000 | 11.181000 |
| H  | 8.882000  | 5.186000 | 12.019000 |
| C  | 5.484000  | 4.642000 | 12.059000 |
| C  | 4.562000  | 4.770000 | 10.843000 |
| H  | 3.912000  | 3.892000 | 10.792000 |
| H  | 5.143000  | 4.829000 | 9.917000  |
| H  | 3.933000  | 5.661000 | 10.931000 |
| C  | 6.392000  | 3.413000 | 11.950000 |
| H  | 7.053000  | 3.347000 | 12.819000 |
| H  | 6.997000  | 3.453000 | 11.039000 |
| H  | 5.772000  | 2.512000 | 11.918000 |
| C  | 4.726000  | 4.677000 | 13.353000 |
| C  | 3.807000  | 3.883000 | 13.899000 |
| H  | 3.403000  | 2.979000 | 13.459000 |
| C  | 3.342000  | 4.381000 | 15.272000 |
| H  | 2.588000  | 3.740000 | 15.730000 |
| C  | 4.599000  | 4.511000 | 16.123000 |
| C  | 4.819000  | 3.894000 | 17.347000 |
| H  | 4.047000  | 3.273000 | 17.791000 |
| C  | 6.048000  | 4.074000 | 17.995000 |
| H  | 6.230000  | 3.592000 | 18.950000 |
| C  | 7.039000  | 4.856000 | 17.407000 |
| H  | 7.998000  | 4.981000 | 17.898000 |
| C  | 6.817000  | 5.488000 | 16.174000 |
| H  | 7.606000  | 6.076000 | 15.721000 |

|   |          |          |           |
|---|----------|----------|-----------|
| C | 5.588000 | 5.327000 | 15.545000 |
| C | 5.128000 | 5.903000 | 14.189000 |
| C | 3.804000 | 6.649000 | 14.462000 |
| C | 3.478000 | 7.963000 | 14.147000 |
| H | 4.186000 | 8.612000 | 13.645000 |
| C | 2.200000 | 8.443000 | 14.468000 |
| H | 1.945000 | 9.469000 | 14.222000 |
| C | 1.265000 | 7.619000 | 15.089000 |
| H | 0.280000 | 8.003000 | 15.336000 |
| C | 1.588000 | 6.289000 | 15.385000 |
| H | 0.860000 | 5.635000 | 15.855000 |
| C | 2.849000 | 5.808000 | 15.061000 |
| H | 6.873000 | 9.507000 | 15.722000 |

### 3.6 AntiAS-4c

|    |          |          |           |
|----|----------|----------|-----------|
| Ru | 6.702000 | 8.480000 | 12.936000 |
| Cl | 8.745000 | 7.997000 | 11.837000 |
| Cl | 4.558000 | 9.522000 | 12.736000 |
| C  | 7.271000 | 8.848000 | 14.614000 |
| H  | 7.227000 | 8.184000 | 15.477000 |
| C  | 5.933000 | 6.745000 | 13.215000 |
| N  | 5.125000 | 6.328000 | 14.198000 |
| C  | 4.945000 | 6.961000 | 15.475000 |
| C  | 5.720000 | 6.506000 | 16.547000 |
| H  | 6.447000 | 5.718000 | 16.379000 |
| C  | 5.561000 | 7.079000 | 17.808000 |
| H  | 6.166000 | 6.731000 | 18.638000 |
| C  | 4.629000 | 8.104000 | 17.995000 |
| H  | 4.509000 | 8.554000 | 18.975000 |
| C  | 3.858000 | 8.549000 | 16.921000 |
| H  | 3.142000 | 9.352000 | 17.060000 |
| C  | 4.007000 | 7.977000 | 15.656000 |
| H  | 3.444000 | 8.342000 | 14.807000 |
| C  | 4.276000 | 5.103000 | 13.885000 |
| C  | 4.398000 | 4.044000 | 14.980000 |
| H  | 3.824000 | 3.162000 | 14.681000 |
| H  | 4.002000 | 4.408000 | 15.933000 |
| H  | 5.441000 | 3.743000 | 15.111000 |
| C  | 2.824000 | 5.560000 | 13.699000 |
| H  | 2.767000 | 6.346000 | 12.940000 |
| H  | 2.411000 | 5.939000 | 14.639000 |
| H  | 2.221000 | 4.709000 | 13.371000 |
| C  | 4.907000 | 4.656000 | 12.602000 |
| C  | 4.791000 | 3.562000 | 11.849000 |
| H  | 4.097000 | 2.746000 | 12.012000 |
| C  | 5.838000 | 3.512000 | 10.729000 |
| H  | 5.765000 | 2.616000 | 10.111000 |
| C  | 5.688000 | 4.794000 | 9.921000  |

|   |           |          |           |
|---|-----------|----------|-----------|
| C | 5.484000  | 4.874000 | 8.550000  |
| H | 5.428000  | 3.969000 | 7.953000  |
| C | 5.347000  | 6.131000 | 7.949000  |
| H | 5.189000  | 6.204000 | 6.878000  |
| C | 5.404000  | 7.287000 | 8.725000  |
| H | 5.284000  | 8.261000 | 8.264000  |
| C | 5.610000  | 7.204000 | 10.108000 |
| H | 5.601000  | 8.121000 | 10.690000 |
| C | 5.770000  | 5.959000 | 10.702000 |
| C | 6.005000  | 5.636000 | 12.178000 |
| C | 7.292000  | 4.778000 | 12.243000 |
| C | 8.418000  | 4.991000 | 13.024000 |
| H | 8.507000  | 5.880000 | 13.636000 |
| C | 9.465000  | 4.060000 | 12.973000 |
| H | 10.355000 | 4.227000 | 13.570000 |
| C | 9.376000  | 2.937000 | 12.153000 |
| H | 10.196000 | 2.227000 | 12.114000 |
| C | 8.228000  | 2.717000 | 11.379000 |
| H | 8.148000  | 1.837000 | 10.749000 |
| C | 7.186000  | 3.631000 | 11.438000 |
| H | 7.731000  | 9.835000 | 14.769000 |

### 3.7 SynAS-4d

|    |          |           |          |
|----|----------|-----------|----------|
| Ru | 3.279000 | 14.448000 | 4.215000 |
| Cl | 2.491000 | 13.549000 | 2.153000 |
| Cl | 4.982000 | 15.745000 | 5.261000 |
| C  | 1.806000 | 15.346000 | 4.760000 |
| H  | 1.113000 | 15.026000 | 5.541000 |
| C  | 3.079000 | 12.963000 | 5.424000 |
| N  | 3.946000 | 11.938000 | 5.453000 |
| C  | 5.093000 | 11.880000 | 4.576000 |
| C  | 6.315000 | 12.450000 | 4.994000 |
| C  | 7.404000 | 12.389000 | 4.118000 |
| H  | 8.343000 | 12.838000 | 4.430000 |
| C  | 7.314000 | 11.789000 | 2.861000 |
| C  | 6.092000 | 11.231000 | 2.481000 |
| H  | 5.998000 | 10.767000 | 1.503000 |
| C  | 4.969000 | 11.262000 | 3.313000 |
| C  | 6.517000 | 13.113000 | 6.330000 |
| H  | 7.061000 | 12.451000 | 7.014000 |
| H  | 5.578000 | 13.404000 | 6.799000 |
| H  | 7.100000 | 14.028000 | 6.206000 |
| C  | 8.490000 | 11.782000 | 1.923000 |
| H  | 8.469000 | 10.912000 | 1.260000 |
| H  | 9.438000 | 11.772000 | 2.470000 |
| H  | 8.486000 | 12.678000 | 1.290000 |
| C  | 3.699000 | 10.627000 | 2.813000 |
| H  | 3.755000 | 9.534000  | 2.887000 |

|   |           |           |           |   |           |           |          |
|---|-----------|-----------|-----------|---|-----------|-----------|----------|
| H | 3.541000  | 10.889000 | 1.765000  | C | 0.268000  | 14.314000 | 5.941000 |
| H | 2.818000  | 10.969000 | 3.355000  | C | -0.635000 | 15.360000 | 6.154000 |
| C | 3.666000  | 10.836000 | 6.458000  | H | -1.546000 | 15.389000 | 5.561000 |
| C | 4.807000  | 10.703000 | 7.471000  | C | -0.393000 | 16.367000 | 7.091000 |
| H | 4.944000  | 11.626000 | 8.036000  | C | 0.794000  | 16.310000 | 7.822000 |
| H | 5.743000  | 10.439000 | 6.968000  | H | 1.013000  | 17.092000 | 8.544000 |
| H | 4.555000  | 9.904000  | 8.175000  | C | 1.732000  | 15.285000 | 7.652000 |
| C | 3.437000  | 9.492000  | 5.759000  | C | -0.063000 | 13.298000 | 4.876000 |
| H | 3.232000  | 8.735000  | 6.522000  | H | -0.847000 | 12.611000 | 5.214000 |
| H | 4.328000  | 9.189000  | 5.201000  | H | 0.799000  | 12.698000 | 4.584000 |
| H | 2.581000  | 9.537000  | 5.085000  | H | -0.441000 | 13.799000 | 3.978000 |
| C | 2.413000  | 11.358000 | 7.092000  | C | -1.363000 | 17.502000 | 7.276000 |
| C | 1.614000  | 10.901000 | 8.055000  | H | -1.335000 | 17.890000 | 8.299000 |
| H | 1.744000  | 9.976000  | 8.605000  | H | -2.389000 | 17.192000 | 7.057000 |
| C | 0.436000  | 11.840000 | 8.336000  | H | -1.121000 | 18.335000 | 6.603000 |
| H | -0.227000 | 11.478000 | 9.123000  | C | 2.982000  | 15.334000 | 8.487000 |
| C | 1.048000  | 13.196000 | 8.663000  | H | 2.758000  | 15.111000 | 9.537000 |
| C | 0.840000  | 13.925000 | 9.826000  | H | 3.421000  | 16.333000 | 8.439000 |
| H | 0.161000  | 13.553000 | 10.588000 | H | 3.747000  | 14.646000 | 8.134000 |
| C | 1.525000  | 15.133000 | 10.011000 | C | 2.194000  | 11.944000 | 7.416000 |
| H | 1.371000  | 15.706000 | 10.920000 | C | 0.806000  | 11.318000 | 7.221000 |
| C | 2.412000  | 15.588000 | 9.039000  | H | 0.669000  | 10.986000 | 6.190000 |
| H | 2.957000  | 16.514000 | 9.189000  | H | 0.017000  | 12.026000 | 7.492000 |
| C | 2.617000  | 14.860000 | 7.858000  | H | 0.727000  | 10.442000 | 7.872000 |
| H | 3.321000  | 15.224000 | 7.118000  | C | 2.408000  | 12.281000 | 8.892000 |
| C | 1.917000  | 13.674000 | 7.665000  | H | 2.301000  | 11.357000 | 9.469000 |
| C | 2.004000  | 12.701000 | 6.470000  | H | 1.658000  | 12.995000 | 9.246000 |
| C | 0.560000  | 12.478000 | 5.973000  | H | 3.407000  | 12.680000 | 9.069000 |
| C | 0.068000  | 12.614000 | 4.679000  | C | 3.261000  | 11.049000 | 6.869000 |
| H | 0.710000  | 12.925000 | 3.864000  | C | 3.633000  | 9.799000  | 7.142000 |
| C | -1.283000 | 12.331000 | 4.431000  | H | 3.256000  | 9.184000  | 7.951000 |
| H | -1.667000 | 12.439000 | 3.422000  | C | 4.594000  | 9.235000  | 6.089000 |
| C | -2.124000 | 11.915000 | 5.460000  | H | 4.892000  | 8.204000  | 6.284000 |
| H | -3.169000 | 11.703000 | 5.257000  | C | 3.854000  | 9.394000  | 4.761000 |
| C | -1.620000 | 11.755000 | 6.757000  | C | 3.526000  | 8.369000  | 3.885000 |
| H | -2.265000 | 11.412000 | 7.561000  | H | 3.847000  | 7.353000  | 4.091000 |
| C | -0.281000 | 12.024000 | 7.004000  | C | 2.761000  | 8.658000  | 2.747000 |
| H | 1.580000  | 16.302000 | 4.266000  | H | 2.496000  | 7.862000  | 2.059000 |

### 3.8 AntiAS-4d

|    |          |           |          |   |          |           |          |
|----|----------|-----------|----------|---|----------|-----------|----------|
| Ru | 4.093000 | 14.448000 | 4.443000 | C | 2.336000 | 9.962000  | 2.503000 |
| Cl | 4.713000 | 13.248000 | 2.495000 | H | 1.745000 | 10.185000 | 1.622000 |
| Cl | 5.055000 | 15.897000 | 6.069000 | C | 2.683000 | 11.001000 | 3.378000 |
| C  | 2.610000 | 15.321000 | 3.889000 | H | 2.389000 | 12.018000 | 3.154000 |
| H  | 1.582000 | 15.126000 | 4.183000 | C | 3.454000 | 10.716000 | 4.496000 |
| C  | 3.325000 | 13.092000 | 5.586000 | C | 3.898000 | 11.679000 | 5.628000 |
| N  | 2.363000 | 13.172000 | 6.522000 | C | 5.414000 | 11.517000 | 5.771000 |
| C  | 1.455000 | 14.280000 | 6.706000 | C | 6.389000 | 12.505000 | 5.720000 |
|    |          |           |          | H | 6.140000 | 13.555000 | 5.605000 |
|    |          |           |          | C | 7.736000 | 12.152000 | 5.873000 |
|    |          |           |          | H | 8.495000 | 12.926000 | 5.826000 |
|    |          |           |          | C | 8.100000 | 10.825000 | 6.087000 |

|   |          |           |          |   |          |           |          |
|---|----------|-----------|----------|---|----------|-----------|----------|
| H | 9.146000 | 10.559000 | 6.201000 | C | 5.781000 | 10.183000 | 6.013000 |
| C | 7.116000 | 9.832000  | 6.165000 | H | 2.777000 | 16.148000 | 3.182000 |
| H | 7.390000 | 8.797000  | 6.345000 |   |          |           |          |

## 4 Topological Steric Maps

Topological steric maps analyzed in this study were performed using SambVca 2.1 program developed by Cavallo *et al.*<sup>17</sup>. Using the directions provided by these authors on their website,<sup>18</sup> topological steric maps were obtained using the xyz coordinates generated through computation (see section 3 of this ESI).

## 5 Bibliography

- 1 M. R. Serrato, M. Melaimi and G. Bertrand, *Chem. Commun.*, 2022, **58**, 7519–7521.
- 2 T. M. Trnka, E. L. Dias, M. W. Day and R. H. Grubbs, *Arkivoc*, 2002, **2002**, 28–41.
- 3 A. Michrowska, R. Bujok, S. Harutyunyan, V. Sashuk, G. Dolgonos and K. Grela, *J. Am. Chem. Soc.*, 2004, **126**, 9318–9325.
- 4 J. J. Van Veldhuizen, D. G. Gillingham, S. B. Garber, O. Kataoka and A. H. Hoveyda, *J. Am. Chem. Soc.*, 2003, **125**, 12502–12508.
- 5 H. Clavier and S. P. Nolan, *Chem. - A Eur. J.*, 2007, **13**, 8029–8036.
- 6 H. Clavier, F. Caijo, E. Borré, D. Rix, F. Boeda, S. P. Nolan and M. Mauduit, *European J. Org. Chem.*, 2009, **2009**, 4254–4265.
- 7 T. R. Hoye and M. A. Promo, *Tetrahedron Lett.*, 1999, **40**, 1429–1432.
- 8 A. Dumas, S. Colombel-Rouen, I. Curbet, G. Forcher, F. Tripoteau, F. Caijo, P. Queval, M. Rouen, O. Baslé and M. Mauduit, *Catal. Sci. Technol.*, 2019, **9**, 436–443.
- 9 J. Morvan, F. Vermersch, J. Lorkowski, J. Talcik, T. Vives, T. Roisnel, C. Crévisy, N. Vanthuyne, G. Bertrand, R. Jazzar and M. Mauduit, *Catal. Sci. Technol.*, 2023, **13**, 381–388.
- 10 J. Hartung and R. H. Grubbs, *J. Am. Chem. Soc.*, 2013, **135**, 10183–10185.
- 11 J. Morvan, F. Vermersch, Z. Zhang, T. Vives, T. Roisnel, C. Crévisy, L. Falivene, L. Cavallo, N. Vanthuyne, G. Bertrand, R. Jazzar and M. Mauduit, *Organometallics*, 2023, **42**, 495–504.
- 12 C. Theunissen, M. A. Ashley and T. Rovis, *J. Am. Chem. Soc.*, 2019, **141**, 6791–6796.
- 13 A. Del Vecchio, J. Talcik, S. Colombel-Rouen, J. Lorkowski, M. R. Serrato, T. Roisnel, N. Vanthuyne, G. Bertrand, R. Jazzar and M. Mauduit, *ACS Catal.*, 2023, **13**, 6195–6202.
- 14 W. H. Henderson, C. T. Check, N. Proust and J. P. Stambuli, *Org. Lett.*, 2010, **12**, 824–827.

- 15 M. J. Frisch, G. W. Trucks, H. B. Schlegel, G. E. Scuseria, M. A. Robb, J. R. Cheeseman, G. Scalmani, V. Barone, G. A. Petersson, H. Nakatsuji, X. Li, M. Caricato, A. V. Marenich, J. Bloino, B. G. Janesko, R. Gomperts, B. Mennucci, H. P. Hratchian, J. V. Ortiz, A. F. Izmaylov, J. L. Sonnenberg, D. Williams-Young, F. Ding, F. Lipparini, F. Egidi, J. Goings, B. Peng, A. Petrone, T. Henderson, D. Ranasinghe, V. G. Zakrzewski, J. Gao, N. Rega, G. Zheng, W. Liang, M. Hada, M. Ehara, K. Toyota, R. Fukuda, J. Hasegawa, M. Ishida, T. Nakajima, Y. Honda, O. Kitao, H. Nakai, T. Vreven, K. Throssell, J. A. Montgomery, Jr., J. E. Peralta, F. Ogliaro, M. J. Bearpark, J. J. Heyd, E. N. Brothers, K. N. Kudin, V. N. Staroverov, T. A. Keith, R. Kobayashi, J. Normand, K. Raghavachari, A. P. Rendell, J. C. Burant, S. S. Iyengar, J. Tomasi, M. Cossi, J. M. Millam, M. Klene, C. Adamo, R. Cammi, J. W. Ochterski, R. L. Martin, K. Morokuma, O. Farkas, J. B. Foresman, and D. J. Fox, Gaussian, Inc., Wallingford CT, 2016.
- 16 Y. Yang, M. N. Weaver, and K. M. Merz, Jr. Assessment of the “6-31+G\*\*+LANL2DZ” Mixed Basis Set Coupled with Density Functional Theory Methods and the Effective Core Potential: Prediction of Heats of Formation and Ionization Potentials for First-Row Transition-Metal Complexes. *J. Phys. Chem.* **A2009**, *113*, 9843–9851.
- 17 L. Falivene, Z. Cao, A. Petta, L. Serra, A. Poater, R. Oliva, V. Scarano and L. Cavallo. *Nature Chem.* **2019**, *11*, 872-879.
- 18 <https://www.molnac.unisa.it/OMtools/sambvca2.1/help/help.html>
